# Supplementary material for: Modelling the drivers of the spread of Plasmodium falciparum hrp2 gene deletions in sub-Saharan Africa
Source: eLife journal article supplement (doi:10.7554/elife.25008), 2017-08-24

Starting  
*pfhrp2*-deletion  
frequency = 3%

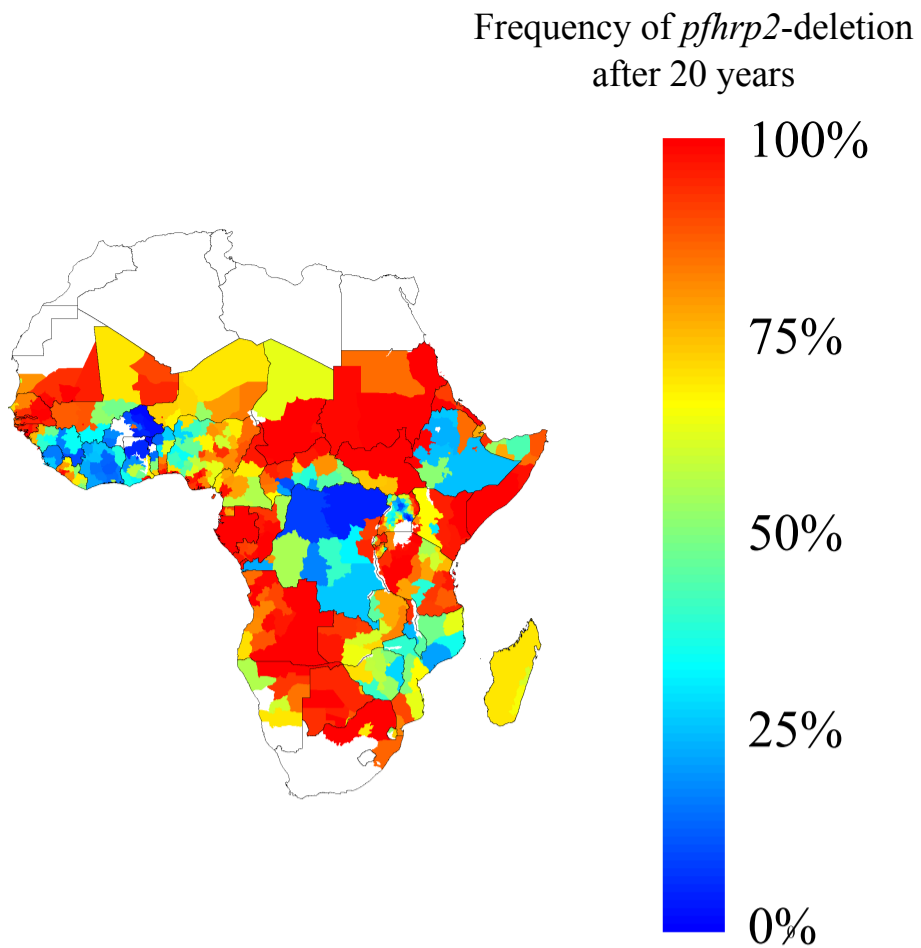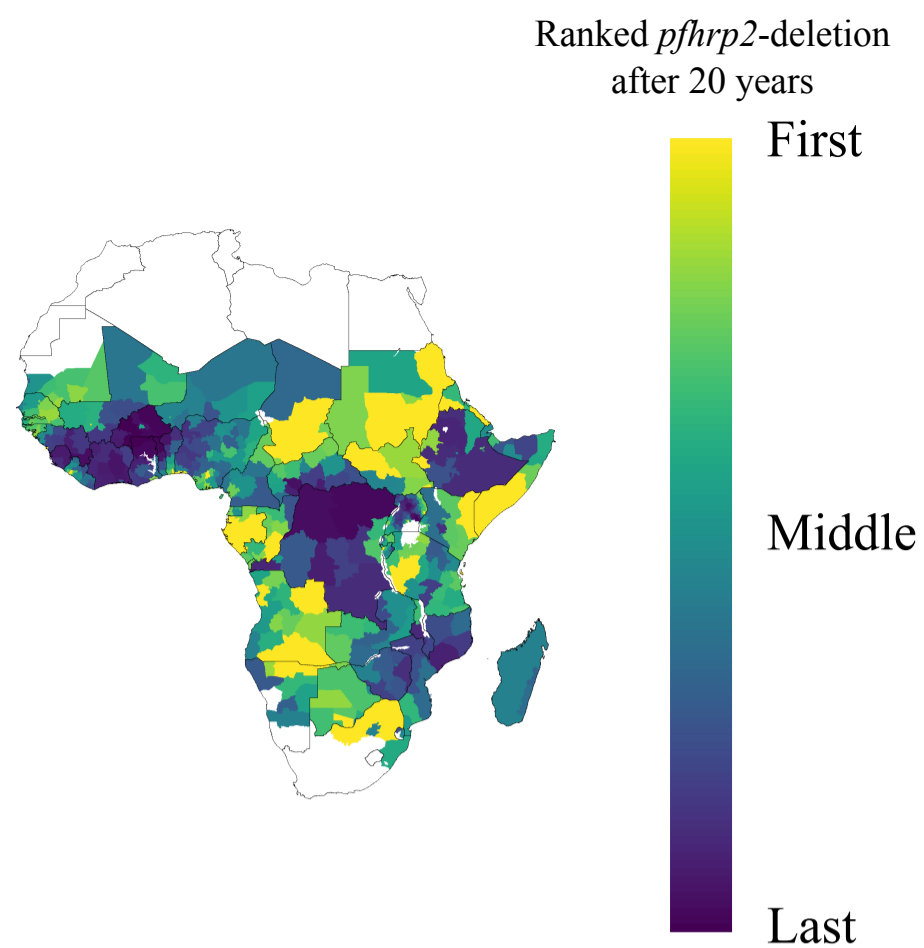

Starting  
*pfhrp2*-deletion  
frequency = 4.5%

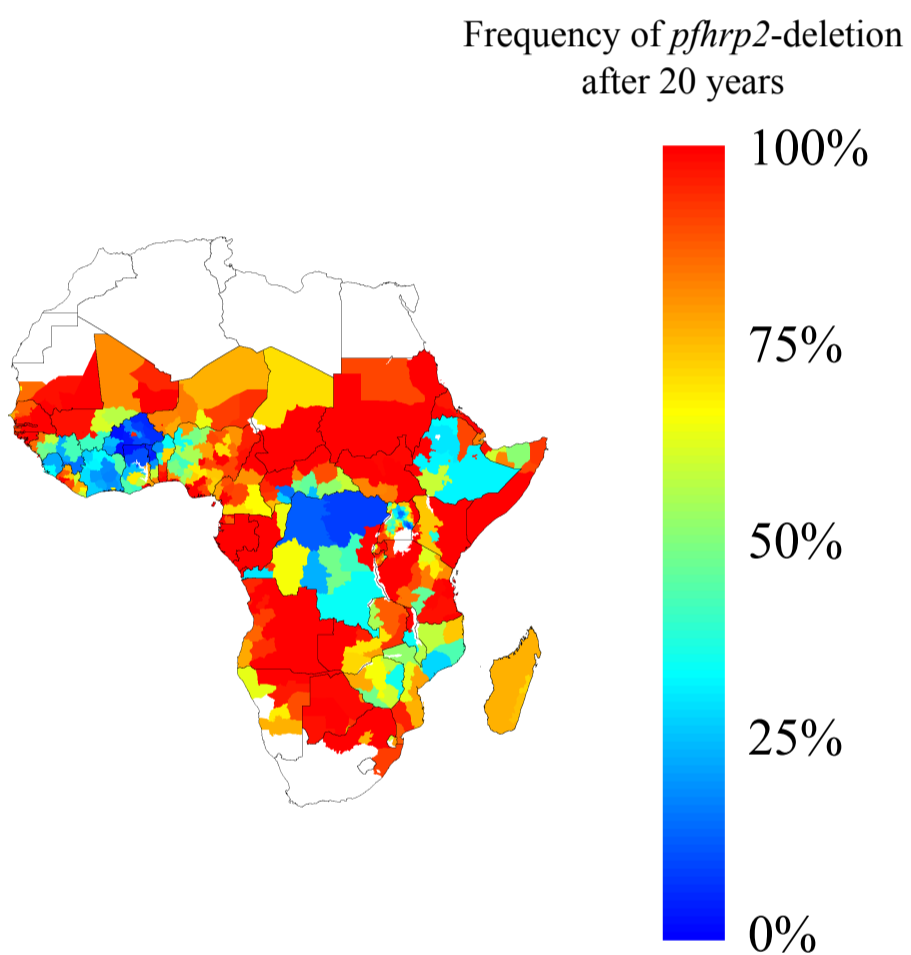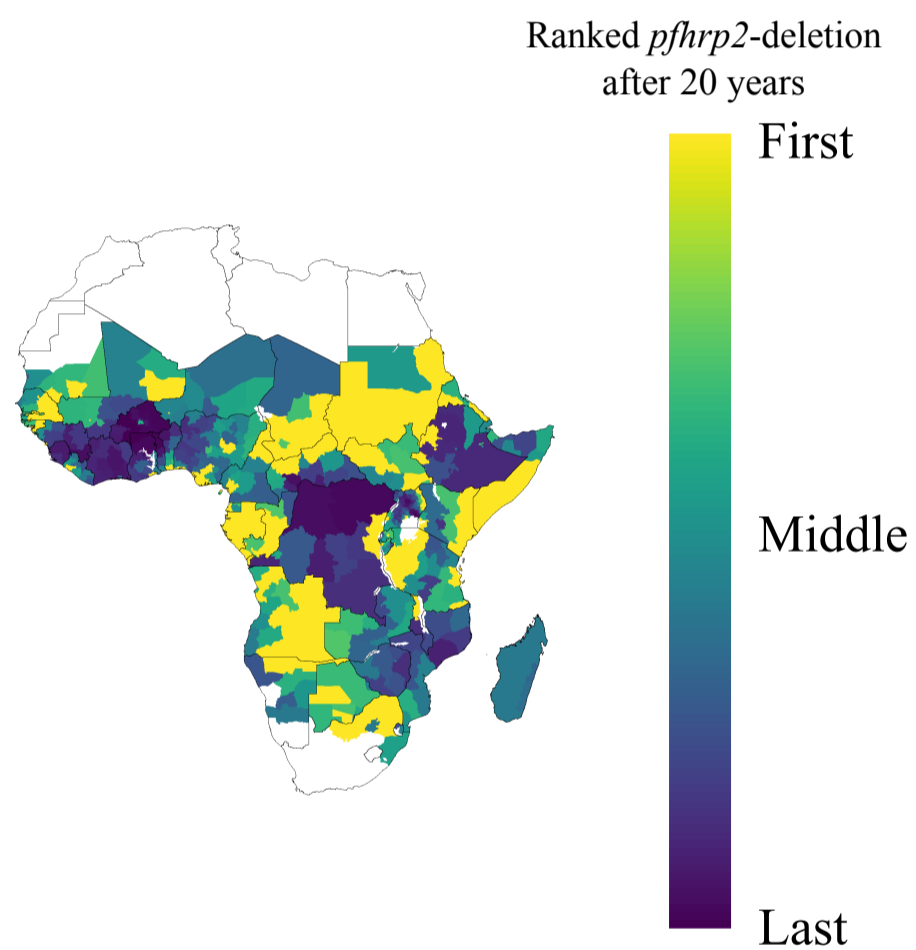

Starting  
*pfhrp2*-deletion  
frequency = 7.5%

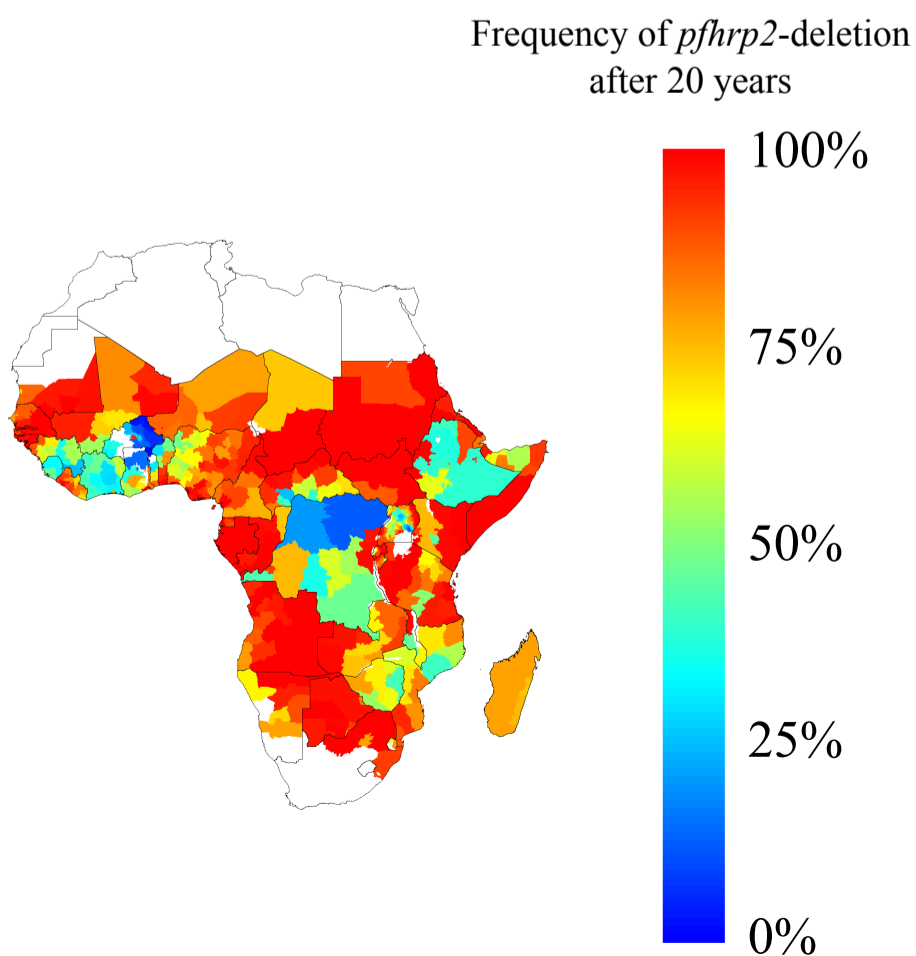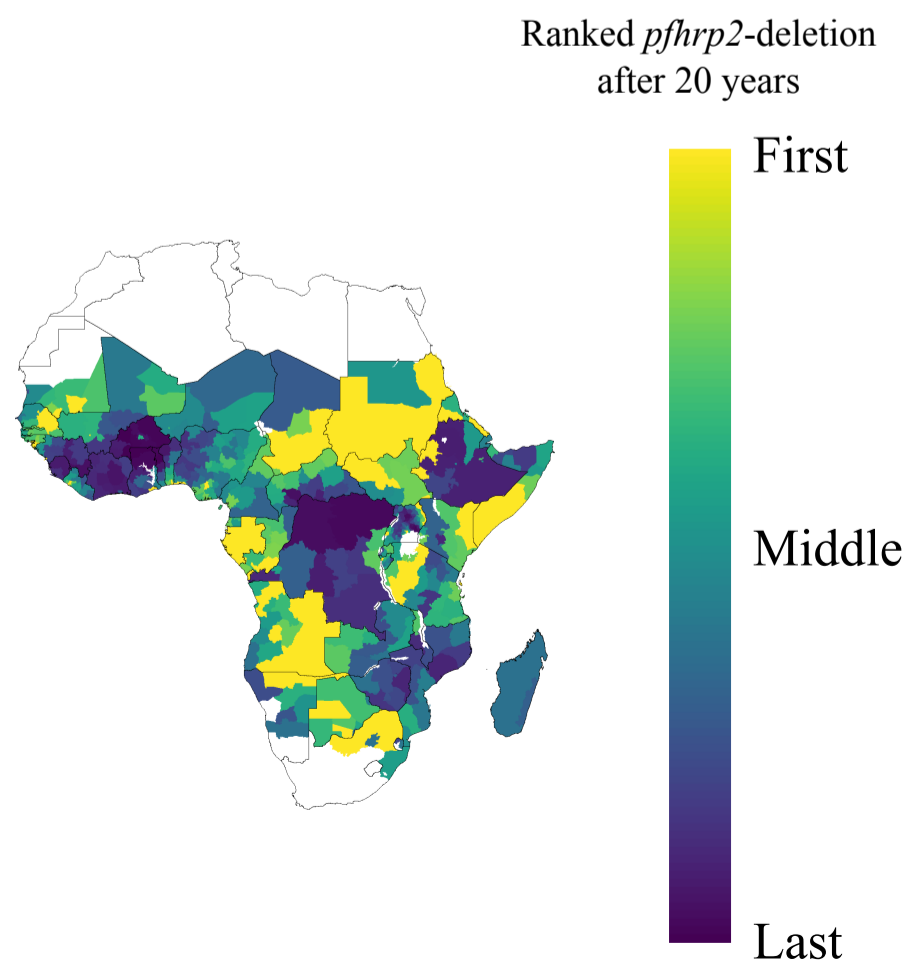

Supplement: supp [file elife-25008-supp-v1.zip]
