# Supplementary material for: Modelling the drivers of the spread of Plasmodium falciparum hrp2 gene deletions in sub-Saharan Africa
Source: eLife journal article supplement (doi:10.7554/elife.25008), 2017-08-24
Supplement: supp [file elife-25008-supp-v1.zip]

a

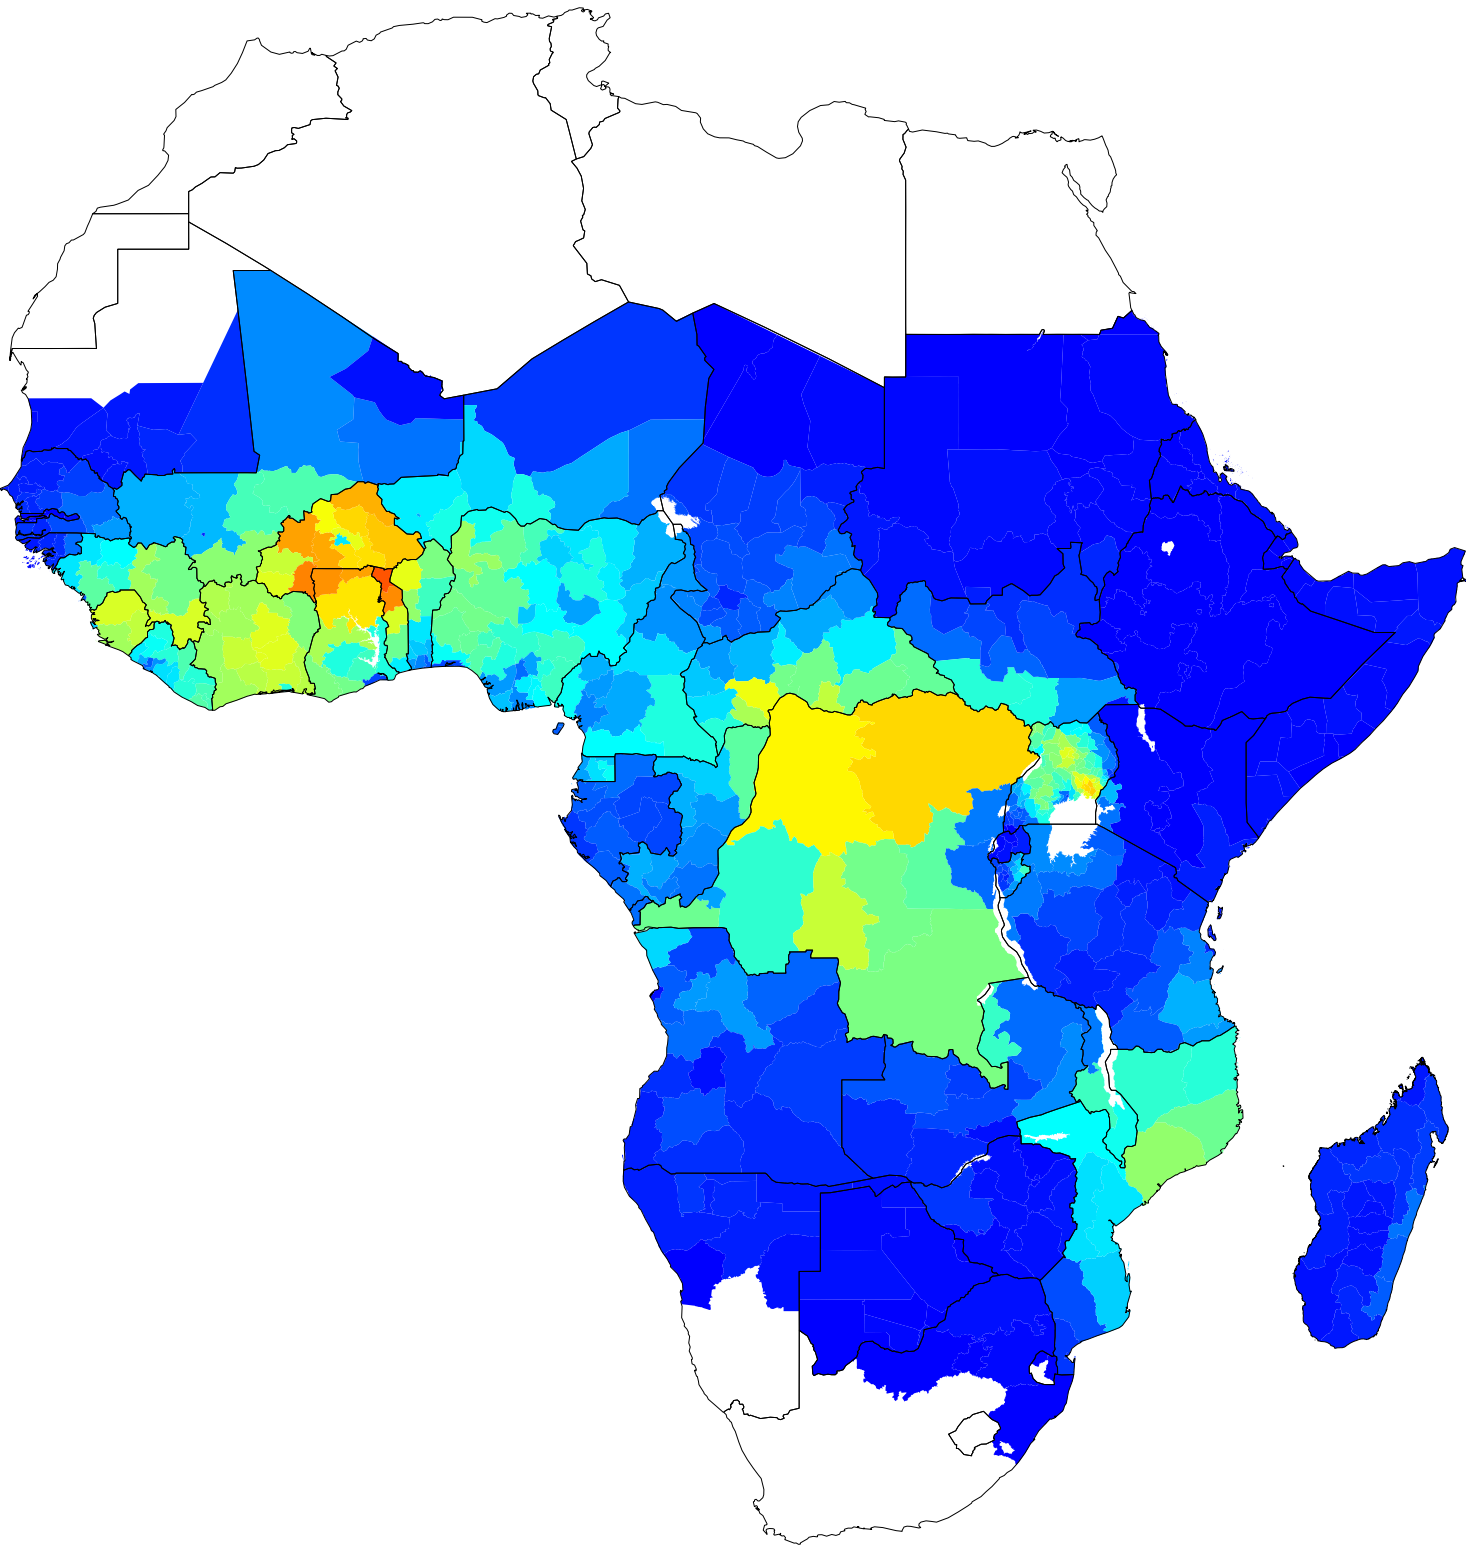

**Microscopy  
PfPR 2–10**

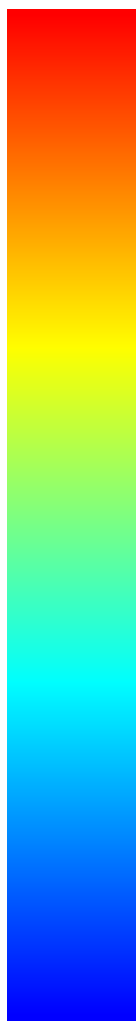

100%  
75%  
50%  
25%  
0%

b

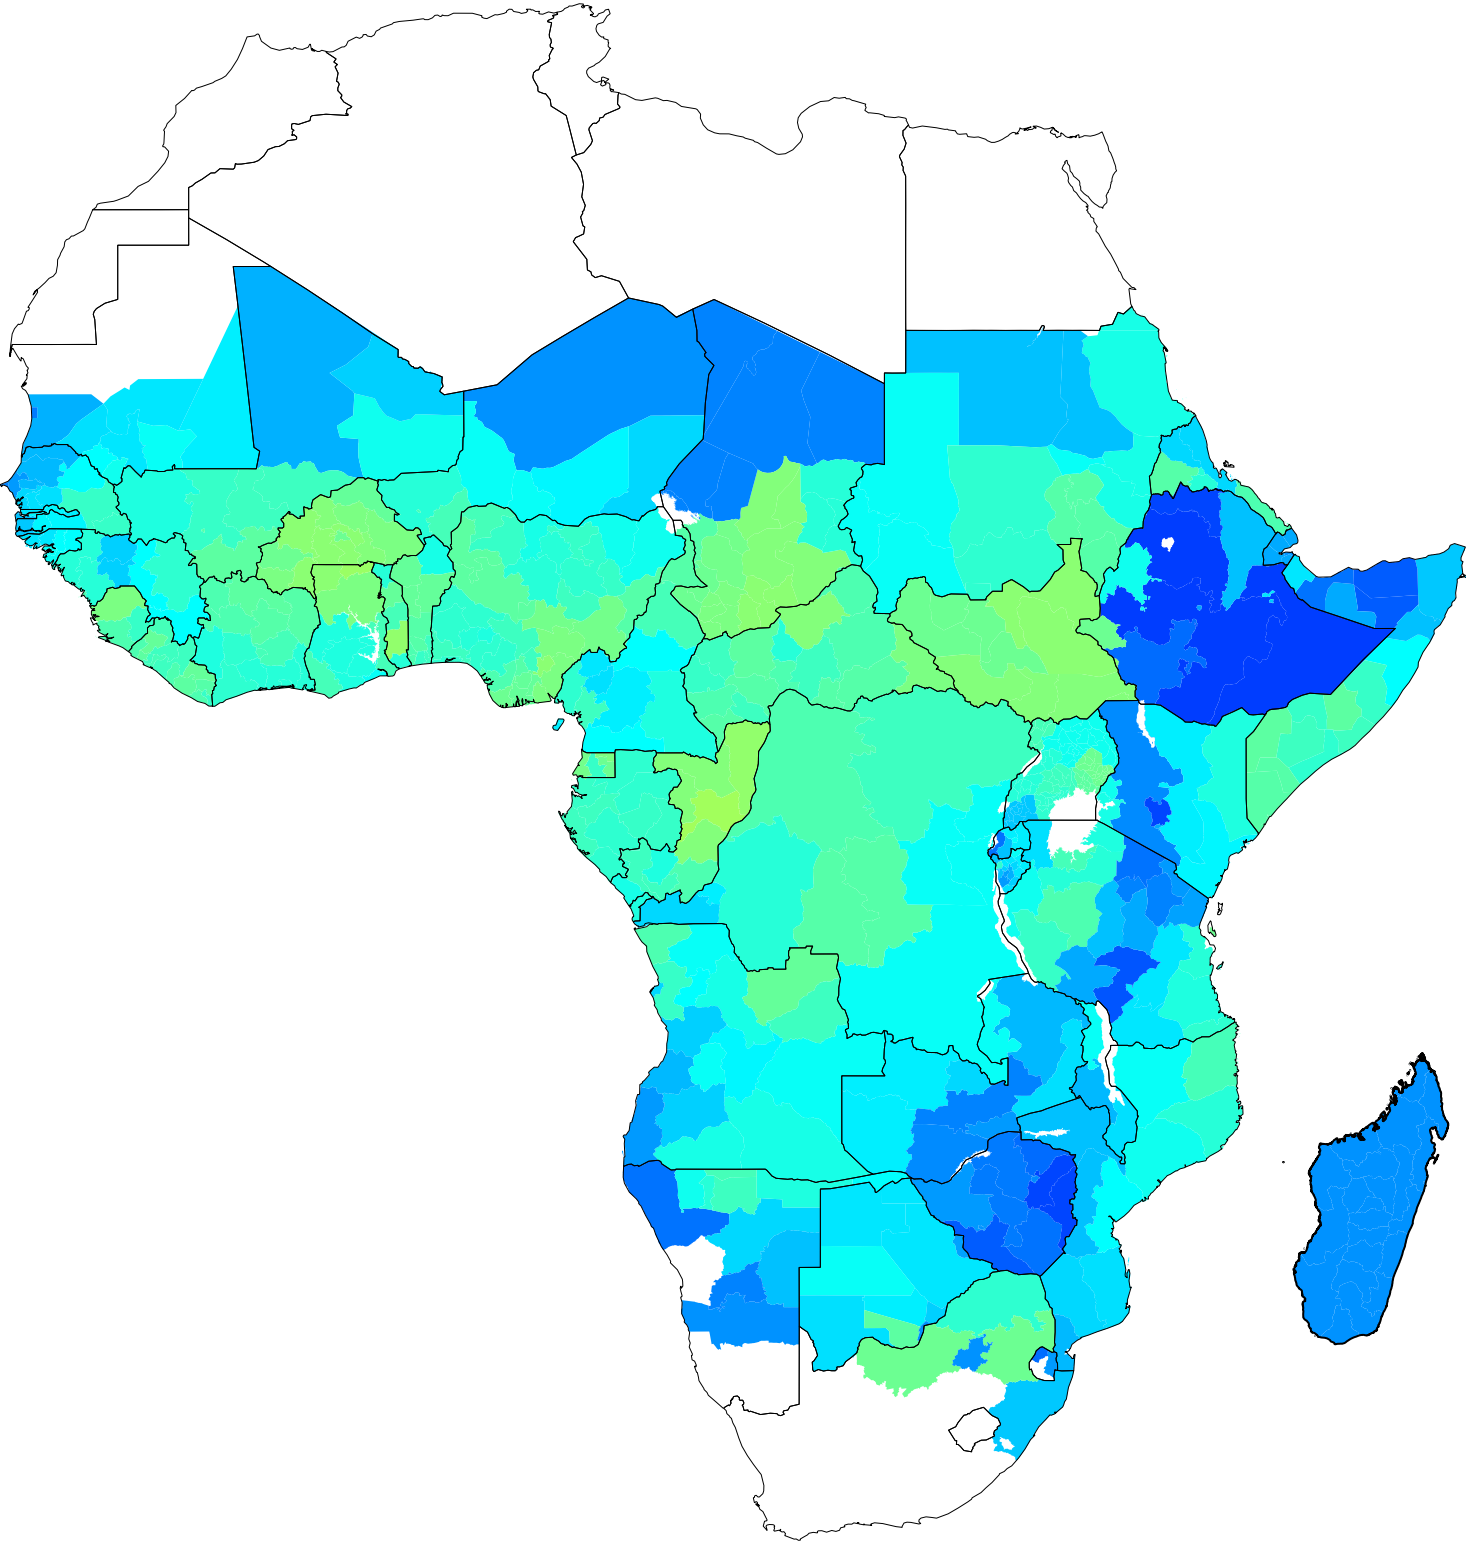

**Probability of seeking  
treatment (fT)**

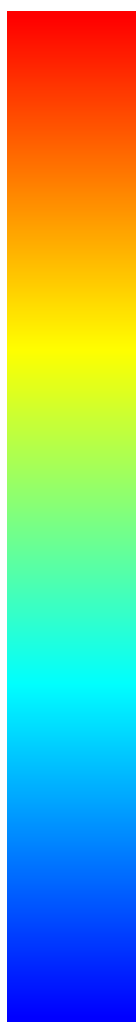

100%  
75%  
50%  
25%  
0%

c

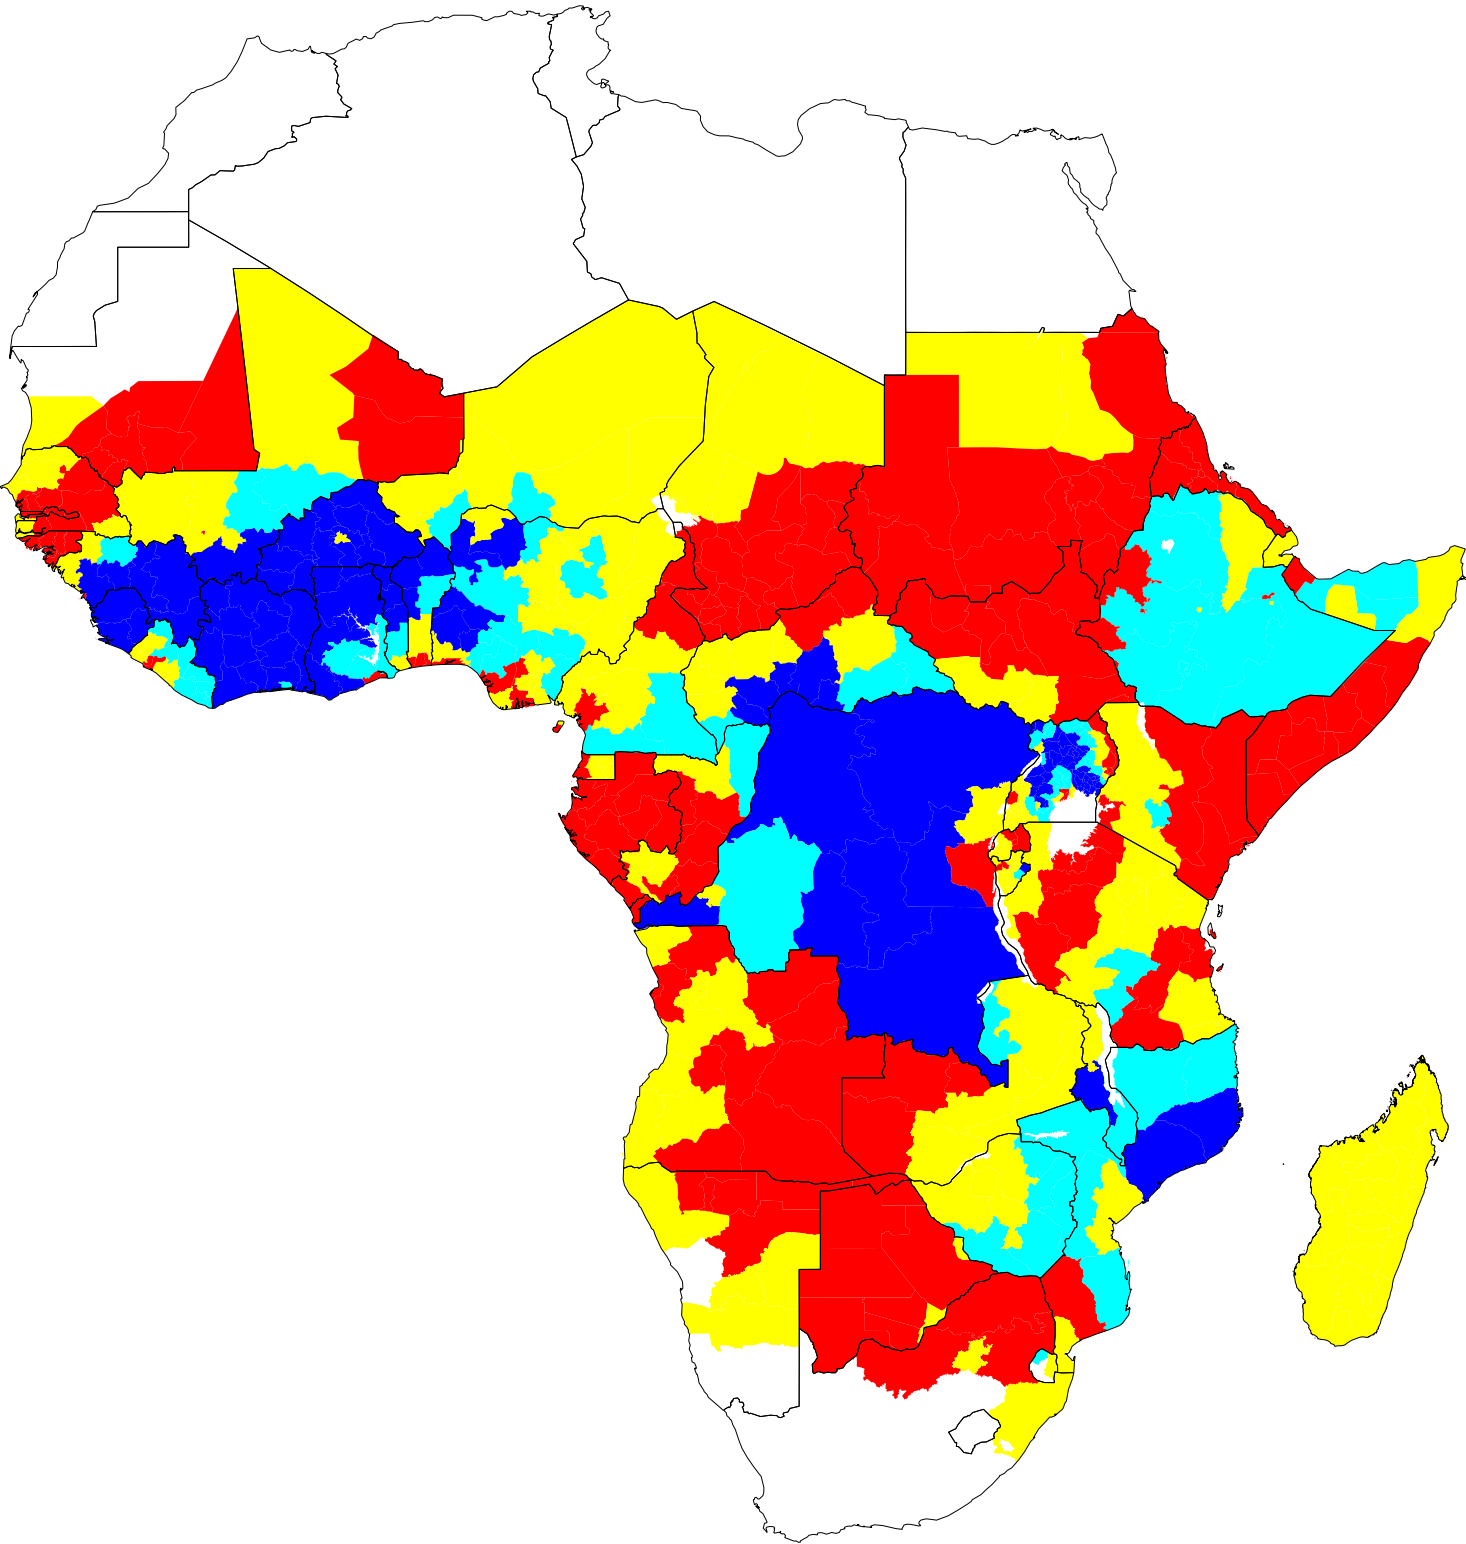

**HRP2 Concern**

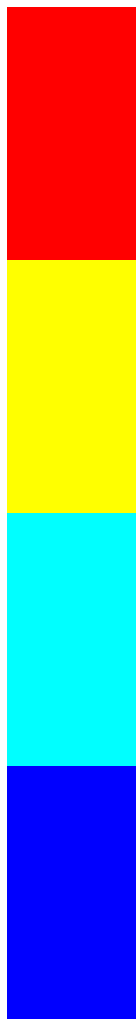

High  
Moderate  
Slight  
Marginal
