# Supplementary material for: Modelling the drivers of the spread of Plasmodium falciparum hrp2 gene deletions in sub-Saharan Africa
Source: eLife journal article supplement (doi:10.7554/elife.25008), 2017-08-24
Supplement: supp [file elife-25008-supp-v2.zip]

Archive with 20 entries (20 files):
- elife_poa_e25008_Figure_3_source_data_1_Sourced_from_doi:_10.1093/infdis/jiw538.xlsx
- elife_poa_e25008_Video_1.mp4
- elife_poa_e25008_Figure_3_source_data_1.csv
- elife_poa_e25008_Figure_1_Figure_Supplement_3.pdf
- elife_poa_e25008_Figure_2_source_data_1.csv
- elife_poa_e25008_Figure_4_Figure_Supplement_5.pdf
- elife_poa_e25008_Figure_4_Figure_Supplement_2.pdf
- elife_poa_e25008_Figure_1_Figure_Supplement_5.pdf
- elife_poa_e25008_Figure_4_Figure_Supplement_1.pdf
- elife_poa_e25008_Figure_4_Figure_Supplement_4.pdf
- elife_poa_e25008_Figure_1_Figure_Supplement_2.pdf
- elife_poa_e25008_Figure_3_Figure_Supplement_1.pdf
- elife_poa_e25008_Figure_2_Figure_Supplement_1.pdf
- elife_poa_e25008_Figure_4_source_data_1.csv
- elife_poa_e25008_Figure_1_Figure_Supplement_1.pdf
- elife_poa_e25008_Figure_1_Figure_Supplement_4.pdf
- elife_poa_e25008_Figure_1_source_data_1.csv
- elife_poa_e25008_Transparent_Reporting_File.pdf
- elife_poa_e25008_Supplementary_File_1.docx
- elife_poa_e25008_Figure_4_Figure_Supplement_3.pdf
