# Supplementary material for: Modelling the drivers of the spread of Plasmodium falciparum hrp2 gene deletions in sub-Saharan Africa
Source: eLife journal article supplement (doi:10.7554/elife.25008), 2017-08-24
Supplement: supp [file elife-25008-supp-v2.zip › elife_poa_e25008_Figure_1_source_data_1.csv]

	hrp2.Deletion.Allele.Frequency_A	Prevalence	Years	hrp2.Deletion.Allele.Frequency_B	Starting Frequency	Years	hrp2.Deletion.Allele.Frequency_CD	Proportion.of.Monoinfections.Due.to.hrp2.Deleted.Strains	PCR.Prevalence
1	0.080042556	10	0.083333333	0.019875443	12	0.083333333	0.61600519	0.393707402	0.151172333
2	0.079053191	10	0.166666667	0.019847332	12	0.166666667	0.637853498	0.414398209	0.148620333
3	0.079611734	10	0.25	0.019814513	12	0.25	0.655774849	0.423164924	0.164625333
4	0.078903973	10	0.333333333	0.020193441	12	0.333333333	0.538232945	0.339917368	0.161923667
5	0.078777781	10	0.416666667	0.020361986	12	0.416666667	0.56447828	0.363030158	0.181156667
6	0.077690954	10	0.5	0.020133667	12	0.5	0.564981166	0.360725326	0.191288667
7	0.077889034	10	0.583333333	0.01999874	12	0.583333333	0.473068625	0.299044336	0.194733667
8	0.078652293	10	0.666666667	0.020015677	12	0.666666667	0.601119462	0.391011519	0.216825667
9	0.078909706	10	0.75	0.020499584	12	0.75	0.451475859	0.287657044	0.225918333
10	0.078532107	10	0.833333333	0.020595166	12	0.833333333	0.46581193	0.29789689	0.232845667
11	0.078205031	10	0.916666667	0.020632846	12	0.916666667	0.458417401	0.29698633	0.25141
12	0.078484504	10	1	0.02051184	12	1	0.475342566	0.304245888	0.257472667
13	0.0789013	10	1.083333333	0.020625553	12	1.083333333	0.432445344	0.278570008	0.268253333
14	0.079577811	10	1.166666667	0.02041973	12	1.166666667	0.354336618	0.221157629	0.282180333
15	0.080118892	10	1.25	0.020368354	12	1.25	0.387486528	0.24296899	0.305859333
16	0.079967223	10	1.333333333	0.02001686	12	1.333333333	0.345816651	0.212886687	0.321567
17	0.081451313	10	1.416666667	0.019820202	12	1.416666667	0.301087366	0.185370331	0.326469
18	0.081463519	10	1.5	0.019877155	12	1.5	0.326036044	0.201025751	0.351807333
19	0.0811077	10	1.583333333	0.019837256	12	1.583333333	0.305604925	0.18868186	0.365596
20	0.080636861	10	1.666666667	0.019796313	12	1.666666667	0.268196128	0.161761402	0.381279667
21	0.080845339	10	1.75	0.019767972	12	1.75	0.240489247	0.143216449	0.399712
22	0.081553407	10	1.833333333	0.019594848	12	1.833333333	0.217132728	0.128318998	0.409825
23	0.081426464	10	1.916666667	0.019566856	12	1.916666667	0.261529435	0.154293801	0.432002667
24	0.082289021	10	2	0.019420375	12	2	0.238563912	0.138961669	0.456476
25	0.082344329	10	2.083333333	0.019428825	12	2.083333333	0.214377182	0.123224985	0.465536
26	0.080285746	10	2.166666667	0.019373847	12	2.166666667	0.202671111	0.114258552	0.492287
27	0.080975828	10	2.25	0.019089272	12	2.25	0.188391384	0.102985086	0.506160667
28	0.080495529	10	2.333333333	0.018803775	12	2.333333333	0.160025928	0.085407459	0.522335333
29	0.079717405	10	2.416666667	0.018693247	12	2.416666667	0.173272227	0.092594889	0.543039333
30	0.079821658	10	2.5	0.018635679	12	2.5	0.163865426	0.083256137	0.559542333
31	0.079943527	10	2.583333333	0.018470356	12	2.583333333	0.14570612	0.073964909	0.578806
32	0.080080709	10	2.666666667	0.01844258	12	2.666666667	0.147583337	0.072596224	0.592377
33	0.080454328	10	2.75	0.018370269	12	2.75	0.151948884	0.0750805	0.606105
34	0.080253412	10	2.833333333	0.018465722	12	2.833333333	0.128733317	0.061480492	0.623585333
35	0.080712885	10	2.916666667	0.018507601	12	2.916666667	0.139450682	0.06434586	0.640036
36	0.080466966	10	3	0.018189169	12	3	0.129730906	0.059187102	0.656449333
37	0.081250444	10	3.083333333	0.018340863	12	3.083333333	0.135081978	0.058792724	0.674698
38	0.081170824	10	3.166666667	0.018267469	12	3.166666667	0.111736817	0.048732118	0.681569667
39	0.080682016	10	3.25	0.01812277	12	3.25	0.114226177	0.046547679	0.701417
40	0.080832796	10	3.333333333	0.017742702	12	3.333333333	0.120367657	0.047378821	0.712751667
41	0.080125402	10	3.416666667	0.017559554	12	3.416666667	0.112711073	0.044362064	0.729767667
42	0.079192717	10	3.5	0.017543708	12	3.5	0.106138801	0.040492917	0.741273667
43	0.079423626	10	3.583333333	0.01754113	12	3.583333333	0.100081435	0.036050981	0.756123667
44	0.07931148	10	3.666666667	0.017413327	12	3.666666667	0.100528245	0.035245759	0.769813667
45	0.078661584	10	3.75	0.017142645	12	3.75	0.104648509	0.034839843	0.777787667
46	0.078607289	10	3.833333333	0.016961979	12	3.833333333	0.100304874	0.030876181	0.791354333
47	0.07841242	10	3.916666667	0.016990088	12	3.916666667	0.096064081	0.030453396	0.801881
48	0.077822349	10	4	0.01691776	12	4	0.097864763	0.029145199	0.807806
49	0.078497875	10	4.083333333	0.016997885	12	4.083333333	0.094436628	0.026951379	0.823272667
50	0.077770152	10	4.166666667	0.016801884	12	4.166666667	0.091095481	0.025209194	0.831284
51	0.078083687	10	4.25	0.016800957	12	4.25	0.089778267	0.022970333	0.843566333
52	0.077408904	10	4.333333333	0.016711308	12	4.333333333	0.09242419	0.022847994	0.850446667
53	0.077428607	10	4.416666667	0.016790382	12	4.416666667	0.091144959	0.021891334	0.858878667
54	0.077846642	10	4.5	0.016627443	12	4.5	0.08838714	0.020599847	0.868598667
55	0.077451357	10	4.583333333	0.016706835	12	4.583333333	0.084385273	0.018471282	0.873987333
56	0.078237151	10	4.666666667	0.016612188	12	4.666666667	0.624587127	0.400853959	0.149343667
57	0.078688213	10	4.75	0.016529264	12	4.75	0.582481554	0.369370902	0.143014333
58	0.080923038	10	4.833333333	0.01660188	12	4.833333333	0.638957846	0.414194104	0.164932333
59	0.082139162	10	4.916666667	0.016739804	12	4.916666667	0.660753112	0.429804198	0.176181
60	0.082711664	10	5	0.01679522	12	5	0.582541229	0.376346658	0.181158333
61	0.084207914	10	5.083333333	0.016709436	12	5.083333333	0.632397983	0.413981223	0.202304667
62	0.084507538	10	5.166666667	0.016581657	12	5.166666667	0.476824568	0.302125665	0.197020667
63	0.084807087	10	5.25	0.016727129	12	5.25	0.561599635	0.36378115	0.209714
64	0.085512992	10	5.333333333	0.016564626	12	5.333333333	0.436240426	0.278884045	0.222804667
65	0.086410707	10	5.416666667	0.016660388	12	5.416666667	0.431065223	0.27246967	0.228211333
66	0.086350414	10	5.5	0.016634592	12	5.5	0.447961541	0.284557765	0.246223
67	0.086844335	10	5.583333333	0.016757593	12	5.583333333	0.414806167	0.265589592	0.253299333
68	0.087675099	10	5.666666667	0.016702004	12	5.666666667	0.366165928	0.232798909	0.261049333
69	0.088136306	10	5.75	0.016770476	12	5.75	0.3911028	0.245831509	0.285495
70	0.088825906	10	5.833333333	0.016642418	12	5.833333333	0.335926349	0.210711068	0.301874667
71	0.088941487	10	5.916666667	0.016628119	12	5.916666667	0.395503571	0.249727604	0.327036333
72	0.087879399	10	6	0.016545635	12	6	0.323347036	0.203121961	0.327379667
73	0.088861398	10	6.083333333	0.016189548	12	6.083333333	0.341723742	0.2124076	0.354573
74	0.089083217	10	6.166666667	0.015995196	12	6.166666667	0.325004388	0.200010592	0.365049
75	0.090140999	10	6.25	0.015919227	12	6.25	0.277686102	0.169185235	0.381676333
76	0.090582818	10	6.333333333	0.015802383	12	6.333333333	0.26057073	0.155119308	0.403117667
77	0.090685632	10	6.416666667	0.015667551	12	6.416666667	0.260566447	0.155960909	0.411310333
78	0.091379573	10	6.5	0.015442557	12	6.5	0.235001082	0.135739591	0.429796
79	0.090884344	10	6.583333333	0.015133356	12	6.583333333	0.193462435	0.11125025	0.452520333
80	0.090940426	10	6.666666667	0.014860009	12	6.666666667	0.209818857	0.121514658	0.467828333
81	0.09050356	10	6.75	0.014603379	12	6.75	0.206725669	0.117186015	0.489299
82	0.090023554	10	6.833333333	0.014706652	12	6.833333333	0.197860868	0.10855803	0.504532
83	0.089416455	10	6.916666667	0.014910703	12	6.916666667	0.183031222	0.100348163	0.525424
84	0.089431384	10	7	0.015120657	12	7	0.173501832	0.090503413	0.542900333
85	0.089562976	10	7.083333333	0.015161423	12	7.083333333	0.148690876	0.076836256	0.559653333
86	0.08887174	10	7.166666667	0.015112456	12	7.166666667	0.149452683	0.078374609	0.576985333
87	0.08883004	10	7.25	0.014702005	12	7.25	0.149521616	0.076092367	0.591277
88	0.088166846	10	7.333333333	0.014966769	12	7.333333333	0.143040192	0.069073961	0.608502333
89	0.087992194	10	7.416666667	0.014951906	12	7.416666667	0.135473232	0.063428428	0.628661333
90	0.088277534	10	7.5	0.014710441	12	7.5	0.135663057	0.063388726	0.639093667
91	0.088080984	10	7.583333333	0.014704544	12	7.583333333	0.13811067	0.064442081	0.657810333
92	0.08707217	10	7.666666667	0.014914925	12	7.666666667	0.125194894	0.055096628	0.668062667
93	0.086496175	10	7.75	0.015103956	12	7.75	0.111848792	0.047502967	0.683157333
94	0.086390922	10	7.833333333	0.015449555	12	7.833333333	0.117380246	0.047131756	0.704705333
95	0.084486544	10	7.916666667	0.015527082	12	7.916666667	0.111160551	0.044773149	0.710150333
96	0.084713652	10	8	0.015241658	12	8	0.115361095	0.044516045	0.730178667
97	0.084048716	10	8.083333333	0.014905648	12	8.083333333	0.109026685	0.040621578	0.742347667
98	0.084048156	10	8.166666667	0.014655855	12	8.166666667	0.103090506	0.037530578	0.751911333
99	0.083147543	10	8.25	0.014638198	12	8.25	0.107604455	0.038024317	0.768078667
100	0.082537218	10	8.333333333	0.014408543	12	8.333333333	0.097835302	0.031866422	0.776355333
101	0.082684561	10	8.416666667	0.014565882	12	8.416666667	0.097487656	0.030827972	0.792256667
102	0.082901147	10	8.5	0.014772877	12	8.5	0.099692777	0.030938166	0.802978
103	0.083038506	10	8.583333333	0.014816464	12	8.583333333	0.095344574	0.029289018	0.809416
104	0.081471127	10	8.666666667	0.014816604	12	8.666666667	0.092240595	0.026548956	0.823108333
105	0.080696193	10	8.75	0.014653586	12	8.75	0.095332266	0.025663702	0.830706333
106	0.081004929	10	8.833333333	0.014514968	12	8.833333333	0.088680074	0.023090579	0.843056667
107	0.080295299	10	8.916666667	0.014513419	12	8.916666667	0.088807273	0.021519514	0.851614667
108	0.079798255	10	9	0.014429563	12	9	0.091988532	0.022186179	0.859874667
109	0.079321864	10	9.083333333	0.01450758	12	9.083333333	0.090097958	0.020975314	0.866606
110	0.078600274	10	9.166666667	0.014484286	12	9.166666667	0.088831435	0.018825964	0.87158
111	0.07947374	10	9.25	0.014549972	12	9.25	0.598754406	0.381451945	0.148256333
112	0.078531133	10	9.333333333	0.014399595	12	9.333333333	0.618961266	0.39010428	0.143651333
113	0.079394926	10	9.416666667	0.014351337	12	9.416666667	0.651409303	0.422642989	0.162349
114	0.078982906	10	9.5	0.014288185	12	9.5	0.586295885	0.377223804	0.16507
115	0.078221464	10	9.583333333	0.014318325	12	9.583333333	0.50861349	0.321064754	0.173523667
116	0.077926769	10	9.666666667	0.014280524	12	9.666666667	0.605978207	0.396852944	0.195526667
117	0.077892889	10	9.75	0.014430244	12	9.75	0.54054468	0.346397245	0.200841667
118	0.078882438	10	9.833333333	0.014317812	12	9.833333333	0.453264456	0.287898909	0.203064333
119	0.078830602	10	9.916666667	0.014431446	12	9.916666667	0.382367729	0.242134493	0.220392667
120	0.078757791	10	10	0.014328611	12	10	0.405373167	0.257894499	0.228566333
121	0.080953699	10	10.08333333	0.014775363	12	10.08333333	0.513528119	0.33354906	0.252376667
122	0.084464789	10	10.16666667	0.01523464	12	10.16666667	0.390573412	0.248698276	0.250949333
123	0.087363501	10	10.25	0.015780726	12	10.25	0.417160137	0.26338815	0.267743
124	0.091944754	10	10.33333333	0.016438484	12	10.33333333	0.36567628	0.230040422	0.284166
125	0.095797904	10	10.41666667	0.016863273	12	10.41666667	0.330455979	0.203443016	0.301789667
126	0.0992968	10	10.5	0.01725741	12	10.5	0.275562466	0.171614793	0.314833
127	0.104453645	10	10.58333333	0.017547884	12	10.58333333	0.332847301	0.207149598	0.327776
128	0.109881504	10	10.66666667	0.018347281	12	10.66666667	0.274278048	0.164849289	0.347784333
129	0.114543887	10	10.75	0.0188919	12	10.75	0.305066072	0.187927396	0.365488667
130	0.119094105	10	10.83333333	0.019624191	12	10.83333333	0.272654749	0.164753207	0.380433667
131	0.123960633	10	10.91666667	0.020298161	12	10.91666667	0.24456924	0.145546068	0.400762
132	0.130567878	10	11	0.02111786	12	11	0.266265786	0.158082773	0.414348333
133	0.135048389	10	11.08333333	0.02174592	12	11.08333333	0.227331845	0.132474976	0.426991333
134	0.140767921	10	11.16666667	0.022296107	12	11.16666667	0.213982242	0.12517878	0.452837667
135	0.145802143	10	11.25	0.023337266	12	11.25	0.201662995	0.113076649	0.468027667
136	0.150121597	10	11.33333333	0.024169083	12	11.33333333	0.201025037	0.112745447	0.487478667
137	0.15581336	10	11.41666667	0.025388286	12	11.41666667	0.198095988	0.108896436	0.505048667
138	0.162428408	10	11.5	0.026412464	12	11.5	0.197348051	0.107152215	0.522863667
139	0.170187364	10	11.58333333	0.02744413	12	11.58333333	0.180853189	0.096756543	0.544018333
140	0.178952263	10	11.66666667	0.02830412	12	11.66666667	0.15847657	0.081240317	0.558749667
141	0.186636447	10	11.75	0.029365841	12	11.75	0.14987705	0.07590081	0.577776
142	0.19673117	10	11.83333333	0.030688407	12	11.83333333	0.142859148	0.07133878	0.591847333
143	0.203820182	10	11.91666667	0.031557265	12	11.91666667	0.14871449	0.07088468	0.606520333
144	0.212260315	10	12	0.032522284	12	12	0.140261032	0.066677218	0.625526
145	0.223251389	10	12.08333333	0.033827365	12	12.08333333	0.136788748	0.062594991	0.639971333
146	0.23256112	10	12.16666667	0.034801384	12	12.16666667	0.132713771	0.059494039	0.657270333
147	0.240991584	10	12.25	0.036160538	12	12.25	0.123705255	0.054897466	0.671190667
148	0.24879539	10	12.33333333	0.037614089	12	12.33333333	0.117212112	0.050246139	0.680782
149	0.259624677	10	12.41666667	0.038757891	12	12.41666667	0.118848579	0.049348889	0.701954333
150	0.269079139	10	12.5	0.040681237	12	12.5	0.115845859	0.046852588	0.713443333
151	0.277401183	10	12.58333333	0.04228996	12	12.58333333	0.119251063	0.046464045	0.731971
152	0.288532558	10	12.66666667	0.043905948	12	12.66666667	0.11222625	0.041170429	0.741608333
153	0.297360672	10	12.75	0.045501286	12	12.75	0.112369206	0.041147899	0.752075667
154	0.307959236	10	12.83333333	0.047081789	12	12.83333333	0.095832961	0.032673165	0.768204333
155	0.317658395	10	12.91666667	0.048653039	12	12.91666667	0.100788466	0.033634433	0.779290667
156	0.327013147	10	13	0.050129122	12	13	0.099830928	0.031930099	0.792439333
157	0.337706122	10	13.08333333	0.051829579	12	13.08333333	0.095111991	0.028998243	0.801485333
158	0.349887139	10	13.16666667	0.05317134	12	13.16666667	0.103737036	0.031876089	0.809938333
159	0.36135557	10	13.25	0.054477025	12	13.25	0.094911684	0.026510736	0.822358667
160	0.37283139	10	13.33333333	0.056506225	12	13.33333333	0.09355148	0.026110863	0.831493
161	0.384309931	10	13.41666667	0.058852563	12	13.41666667	0.09353014	0.02421718	0.843808667
162	0.397366377	10	13.5	0.061078061	12	13.5	0.089308172	0.022184597	0.851476667
163	0.409690014	10	13.58333333	0.063243214	12	13.58333333	0.089768922	0.021336356	0.858394
164	0.420841769	10	13.66666667	0.065080001	12	13.66666667	0.090590454	0.020639252	0.867085667
165	0.43267753	10	13.75	0.066789708	12	13.75	0.090656064	0.020484982	0.872183667
166	0.442709624	10	13.83333333	0.068669188	12	13.83333333	0.611309393	0.396224867	0.150334667
167	0.454268002	10	13.91666667	0.071153699	12	13.91666667	0.630591651	0.398390564	0.144812667
168	0.467070153	10	14	0.073439566	12	14	0.55143073	0.349241988	0.153361667
169	0.477749045	10	14.08333333	0.075762161	12	14.08333333	0.630606609	0.407558854	0.167194667
170	0.490565333	10	14.16666667	0.077949432	12	14.16666667	0.562437253	0.363518118	0.181184
171	0.503604624	10	14.25	0.080573737	12	14.25	0.555606855	0.357930502	0.192678
172	0.517047317	10	14.33333333	0.082759163	12	14.33333333	0.429874975	0.268891034	0.191325333
173	0.529214643	10	14.41666667	0.085574397	12	14.41666667	0.584207995	0.376226671	0.214843
174	0.542647895	10	14.5	0.088118652	12	14.5	0.459369702	0.29061464	0.220606
175	0.554471334	10	14.58333333	0.090619487	12	14.58333333	0.453049607	0.290740743	0.231015667
176	0.567963229	10	14.66666667	0.093338333	12	14.66666667	0.416030611	0.262566441	0.246019
177	0.580695482	10	14.75	0.095655758	12	14.75	0.400369191	0.247980698	0.250746667
178	0.594437063	10	14.83333333	0.097981346	12	14.83333333	0.375173164	0.235169819	0.258549333
179	0.607981761	10	14.91666667	0.10079007	12	14.91666667	0.374584642	0.238042441	0.283502667
180	0.62131675	10	15	0.103146945	12	15	0.365139853	0.226322127	0.306186
181	0.633680065	10	15.08333333	0.10620172	12	15.08333333	0.33300375	0.206713744	0.32004
182	0.645921409	10	15.16666667	0.109629486	12	15.16666667	0.343479466	0.212367416	0.327969333
183	0.657746157	10	15.25	0.113370015	12	15.25	0.295250838	0.178850778	0.35073
184	0.669405307	10	15.33333333	0.117315157	12	15.33333333	0.270607652	0.164737234	0.361620333
185	0.681436515	10	15.41666667	0.120966427	12	15.41666667	0.256967755	0.15428678	0.375456667
186	0.691356958	10	15.5	0.124864105	12	15.5	0.241347434	0.145171661	0.398149333
187	0.702206583	10	15.58333333	0.129442904	12	15.58333333	0.224240063	0.132456729	0.409585333
188	0.712844198	10	15.66666667	0.132987611	12	15.66666667	0.220412526	0.12701132	0.428056333
189	0.723458618	10	15.75	0.13694022	12	15.75	0.216816099	0.123633107	0.454894333
190	0.733231555	10	15.83333333	0.140849297	12	15.83333333	0.222483979	0.127034501	0.467825667
191	0.744504742	10	15.91666667	0.145318833	12	15.91666667	0.17582256	0.097228688	0.488312667
192	0.754895559	10	16	0.149462198	12	16	0.18244511	0.099516895	0.504859
193	0.765096288	10	16.08333333	0.153908769	12	16.08333333	0.199485234	0.109462679	0.52191
194	0.774366442	10	16.16666667	0.157221036	12	16.16666667	0.183759316	0.097305738	0.540704667
195	0.785566582	10	16.25	0.161293834	12	16.25	0.159529973	0.08463685	0.558681
196	0.795020177	10	16.33333333	0.165903597	12	16.33333333	0.1498972	0.075467004	0.577422333
197	0.80320218	10	16.41666667	0.170441302	12	16.41666667	0.135701788	0.06702127	0.590519
198	0.811549192	10	16.5	0.175521395	12	16.5	0.141141075	0.068301891	0.607650333
199	0.820589663	10	16.58333333	0.180014124	12	16.58333333	0.142457013	0.067835993	0.624747
200	0.828898622	10	16.66666667	0.185001249	12	16.66666667	0.133537571	0.062660858	0.639022
201	0.835970844	10	16.75	0.189733587	12	16.75	0.131419292	0.059423096	0.657174333
202	0.842602658	10	16.83333333	0.194736577	12	16.83333333	0.116793377	0.049674903	0.670211
203	0.850861234	10	16.91666667	0.19964696	12	16.91666667	0.115490815	0.049475975	0.681233
204	0.857797692	10	17	0.205301129	12	17	0.115763255	0.048381512	0.704690667
205	0.864354553	10	17.08333333	0.211507243	12	17.08333333	0.116747227	0.048550742	0.710789
206	0.87133694	10	17.16666667	0.216796078	12	17.16666667	0.103661924	0.038635515	0.733151
207	0.877404216	10	17.25	0.221785801	12	17.25	0.110572323	0.041326345	0.74219
208	0.882626586	10	17.33333333	0.227251249	12	17.33333333	0.10227614	0.037412827	0.754099667
209	0.887982876	10	17.41666667	0.234045484	12	17.41666667	0.105748906	0.036831053	0.767948
210	0.893399455	10	17.5	0.240388115	12	17.5	0.100198353	0.034265472	0.778198333
211	0.89842472	10	17.58333333	0.247059324	12	17.58333333	0.096312366	0.031052483	0.792282333
212	0.903450364	10	17.66666667	0.252725449	12	17.66666667	0.092943769	0.027709714	0.802486333
213	0.907914714	10	17.75	0.259889593	12	17.75	0.095151474	0.028461629	0.810131667
214	0.913243878	10	17.83333333	0.266951221	12	17.83333333	0.098224964	0.027536722	0.822271667
215	0.917604899	10	17.91666667	0.273915233	12	17.91666667	0.097492943	0.027041306	0.8328
216	0.921231113	10	18	0.279237363	12	18	0.089980722	0.023391653	0.840713
217	0.925792334	10	18.08333333	0.285607889	12	18.08333333	0.089543038	0.02311566	0.850779667
218	0.929887432	10	18.16666667	0.292306927	12	18.16666667	0.087429588	0.020813123	0.859698
219	0.933621929	10	18.25	0.298596182	12	18.25	0.088326631	0.020335936	0.867446333
220	0.936649214	10	18.33333333	0.305215098	12	18.33333333	0.085797101	0.019196787	0.872819667
221	0.940666223	10	18.41666667	0.311362733	12	18.41666667	0.661473444	0.428335762	0.155991333
222	0.943814618	10	18.5	0.317697568	12	18.5	0.699955177	0.452109137	0.149231667
223	0.946482053	10	18.58333333	0.32453075	12	18.58333333	0.603815543	0.387626515	0.158182333
224	0.949279524	10	18.66666667	0.332489903	12	18.66666667	0.5492942	0.349307217	0.166334
225	0.95216582	10	18.75	0.340254323	12	18.75	0.495434373	0.312303023	0.171762667
226	0.954442068	10	18.83333333	0.346671599	12	18.83333333	0.609303444	0.39212272	0.196023667
227	0.957559773	10	18.91666667	0.354610057	12	18.91666667	0.552059766	0.35560808	0.200680667
228	0.959492805	10	19	0.361782621	12	19	0.49264339	0.316414844	0.203781
229	0.961762822	10	19.08333333	0.368867964	12	19.08333333	0.436447771	0.279067892	0.223250333
230	0.964178526	10	19.16666667	0.375944163	12	19.16666667	0.496427846	0.315643654	0.233645333
231	0.966227207	10	19.25	0.383604966	12	19.25	0.375242966	0.236196411	0.244344667
232	0.967664471	10	19.33333333	0.391883905	12	19.33333333	0.46150382	0.294961765	0.25849
233	0.969104775	10	19.41666667	0.400036724	12	19.41666667	0.446250982	0.285310967	0.271438333
234	0.970618289	10	19.5	0.408124434	12	19.5	0.349691512	0.219054575	0.284344667
235	0.972487329	10	19.58333333	0.415877608	12	19.58333333	0.32272538	0.199697509	0.300394333
236	0.973884011	10	19.66666667	0.424065835	12	19.66666667	0.326489785	0.20379355	0.318857
237	0.975365011	10	19.75	0.432559148	12	19.75	0.296277477	0.182461344	0.325239667
238	0.97685163	10	19.83333333	0.441709683	12	19.83333333	0.310911577	0.190897694	0.3483
239	0.977794791	10	19.91666667	0.450810762	12	19.91666667	0.261459647	0.160434341	0.358765667
240	0.979180237	10	20	0.460204209	12	20	0.228144268	0.138182687	0.376728333
241	0.080230287	25	0.083333333	0.080281809	8	0.083333333	0.213826993	0.127428615	0.397877667
242	0.080132253	25	0.166666667	0.080241848	8	0.166666667	0.221295954	0.13240417	0.40897
243	0.079987374	25	0.25	0.079874777	8	0.25	0.240141869	0.142064658	0.429511
244	0.080286136	25	0.333333333	0.079876164	8	0.333333333	0.21259424	0.123779698	0.453644667
245	0.079871409	25	0.416666667	0.079681321	8	0.416666667	0.21495295	0.122897545	0.467112667
246	0.079679275	25	0.5	0.080088819	8	0.5	0.20840861	0.116106368	0.492178
247	0.079024675	25	0.583333333	0.080205742	8	0.583333333	0.20153921	0.112682725	0.501961
248	0.078872978	25	0.666666667	0.080221833	8	0.666666667	0.17853871	0.096363554	0.521819
249	0.078858882	25	0.75	0.080168786	8	0.75	0.158392156	0.083617292	0.539593333
250	0.078479351	25	0.833333333	0.080209005	8	0.833333333	0.154278667	0.08018551	0.558675333
251	0.078457859	25	0.916666667	0.080689187	8	0.916666667	0.146518463	0.073807457	0.577191
252	0.077676428	25	1	0.080602204	8	1	0.146735301	0.073990866	0.590811667
253	0.077872915	25	1.083333333	0.080942812	8	1.083333333	0.150627325	0.07337733	0.605709333
254	0.07763582	25	1.166666667	0.080964997	8	1.166666667	0.134345524	0.06428671	0.624063667
255	0.077414999	25	1.25	0.081531799	8	1.25	0.131887546	0.062084621	0.639777333
256	0.077499518	25	1.333333333	0.081920421	8	1.333333333	0.136686468	0.061062083	0.655447667
257	0.077078353	25	1.416666667	0.081620937	8	1.416666667	0.125473903	0.056485387	0.670492
258	0.076418032	25	1.5	0.081422168	8	1.5	0.113902558	0.048185284	0.682255333
259	0.076420404	25	1.583333333	0.081164679	8	1.583333333	0.113554664	0.045418186	0.701752667
260	0.076531437	25	1.666666667	0.081203446	8	1.666666667	0.120420449	0.049397282	0.711415667
261	0.076592811	25	1.75	0.080836426	8	1.75	0.1087649	0.041219655	0.730654667
262	0.0768534	25	1.833333333	0.080728876	8	1.833333333	0.109040508	0.041395237	0.743338333
263	0.076638737	25	1.916666667	0.080389514	8	1.916666667	0.094860979	0.033986697	0.752873
264	0.076778708	25	2	0.080700826	8	2	0.104879909	0.037375209	0.770118333
265	0.076627679	25	2.083333333	0.08069788	8	2.083333333	0.102388276	0.035063052	0.779015667
266	0.076521361	25	2.166666667	0.081141377	8	2.166666667	0.101824617	0.033180644	0.791586
267	0.076718297	25	2.25	0.081037184	8	2.25	0.099406731	0.030678522	0.800755667
268	0.076866754	25	2.333333333	0.080699658	8	2.333333333	0.094305921	0.02848848	0.81117
269	0.077194578	25	2.416666667	0.08113862	8	2.416666667	0.096165865	0.028249086	0.820215333
270	0.077079489	25	2.5	0.081385147	8	2.5	0.092016146	0.02513495	0.831604333
271	0.076987887	25	2.583333333	0.080982501	8	2.583333333	0.088803323	0.023571158	0.843007667
272	0.077149653	25	2.666666667	0.081096773	8	2.666666667	0.088288613	0.021931583	0.849900667
273	0.077201617	25	2.75	0.081570739	8	2.75	0.090663031	0.021568194	0.85963
274	0.077186169	25	2.833333333	0.081870251	8	2.833333333	0.082372936	0.018297498	0.865346
275	0.077256634	25	2.916666667	0.082564587	8	2.916666667	0.08779831	0.019562496	0.870986333
276	0.077547407	25	3	0.082470214	8	3	0.642469137	0.415023611	0.150634
277	0.077265279	25	3.083333333	0.081804141	8	3.083333333	0.740415442	0.483164912	0.156815333
278	0.077405657	25	3.166666667	0.080969195	8	3.166666667	0.706883048	0.45687119	0.169956
279	0.077728726	25	3.25	0.080766686	8	3.25	0.627595788	0.400959205	0.170766333
280	0.077553501	25	3.333333333	0.080420297	8	3.333333333	0.557832796	0.353269873	0.180093667
281	0.077724036	25	3.416666667	0.081076757	8	3.416666667	0.572131552	0.366072418	0.192437333
282	0.077411205	25	3.5	0.080835575	8	3.5	0.397717213	0.253417506	0.192513667
283	0.077046397	25	3.583333333	0.081086275	8	3.583333333	0.450053617	0.286161585	0.203975667
284	0.076592212	25	3.666666667	0.081091023	8	3.666666667	0.420520216	0.268277659	0.221326667
285	0.076537092	25	3.75	0.080866688	8	3.75	0.43427492	0.275806524	0.229906333
286	0.076268977	25	3.833333333	0.081031499	8	3.833333333	0.426797123	0.271234013	0.248449667
287	0.07576124	25	3.916666667	0.081193633	8	3.916666667	0.441013358	0.279239638	0.257789333
288	0.075650318	25	4	0.080662775	8	4	0.391872262	0.247850938	0.263836
289	0.075383049	25	4.083333333	0.080741285	8	4.083333333	0.374678007	0.234416669	0.284984
290	0.075340079	25	4.166666667	0.080364429	8	4.166666667	0.333117987	0.207769423	0.302279
291	0.074979454	25	4.25	0.080122095	8	4.25	0.346892035	0.217128585	0.321112333
292	0.075310373	25	4.333333333	0.079619317	8	4.333333333	0.303102235	0.185206047	0.329625667
293	0.075543647	25	4.416666667	0.079703298	8	4.416666667	0.270572973	0.165740642	0.348623
294	0.075142544	25	4.5	0.079857515	8	4.5	0.299900888	0.185046951	0.365276667
295	0.075553155	25	4.583333333	0.080086841	8	4.583333333	0.268041218	0.161472272	0.383009
296	0.075208314	25	4.666666667	0.079712392	8	4.666666667	0.259303042	0.156330284	0.399882
297	0.075004826	25	4.75	0.07947198	8	4.75	0.24397785	0.144177259	0.411255333
298	0.074710613	25	4.833333333	0.079983502	8	4.833333333	0.225065389	0.130723785	0.430266
299	0.075076473	25	4.916666667	0.079562069	8	4.916666667	0.216695449	0.125833528	0.455493333
300	0.075616298	25	5	0.079883003	8	5	0.192896319	0.10993208	0.467804
301	0.075363044	25	5.083333333	0.079362547	8	5.083333333	0.202658071	0.115191371	0.489747333
302	0.075545139	25	5.166666667	0.079219111	8	5.166666667	0.199457649	0.109951747	0.503660333
303	0.075970549	25	5.25	0.079249532	8	5.25	0.169193887	0.091622675	0.520548
304	0.076187547	25	5.333333333	0.078902401	8	5.333333333	0.175681795	0.091807082	0.541073
305	0.07609264	25	5.416666667	0.079082615	8	5.416666667	0.157251922	0.080657183	0.556801
306	0.075792599	25	5.5	0.07945033	8	5.5	0.153682916	0.0775484	0.578490333
307	0.076453324	25	5.583333333	0.079489487	8	5.583333333	0.148721797	0.074722597	0.594322667
308	0.076956282	25	5.666666667	0.079525053	8	5.666666667	0.138467998	0.067037655	0.604511
309	0.077429282	25	5.75	0.079663157	8	5.75	0.132618602	0.063383191	0.625265667
310	0.077751589	25	5.833333333	0.079572409	8	5.833333333	0.132655868	0.062094742	0.636683
311	0.078526345	25	5.916666667	0.079262378	8	5.916666667	0.129726198	0.057705649	0.659230667
312	0.078673433	25	6	0.079156926	8	6	0.130234954	0.057641403	0.673329667
313	0.079007734	25	6.083333333	0.079114364	8	6.083333333	0.121162451	0.052174794	0.684072333
314	0.079066363	25	6.166666667	0.079207972	8	6.166666667	0.112229449	0.045115629	0.702417333
315	0.07939373	25	6.25	0.079384377	8	6.25	0.120531002	0.048121622	0.713816333
316	0.080068353	25	6.333333333	0.079519697	8	6.333333333	0.111024988	0.042960926	0.727475
317	0.080165316	25	6.416666667	0.079111699	8	6.416666667	0.111651322	0.042642177	0.740096667
318	0.080135332	25	6.5	0.079135774	8	6.5	0.102409754	0.036551572	0.753738667
319	0.0796412	25	6.583333333	0.079833092	8	6.583333333	0.091414043	0.031455141	0.771267667
320	0.079422252	25	6.666666667	0.08024134	8	6.666666667	0.099066405	0.033953459	0.778821
321	0.079161209	25	6.75	0.080904457	8	6.75	0.099795623	0.032311451	0.793155333
322	0.079130746	25	6.833333333	0.081149155	8	6.833333333	0.101650745	0.031651859	0.801301
323	0.078606809	25	6.916666667	0.081596497	8	6.916666667	0.09754258	0.029257854	0.807828667
324	0.079223901	25	7	0.081879397	8	7	0.089284009	0.026140594	0.821838
325	0.079860599	25	7.083333333	0.082028803	8	7.083333333	0.099498545	0.028464295	0.833231
326	0.079947014	25	7.166666667	0.082115211	8	7.166666667	0.090749647	0.023836634	0.841352
327	0.079533919	25	7.25	0.082267359	8	7.25	0.090131927	0.022533605	0.851779667
328	0.079058477	25	7.333333333	0.082220389	8	7.333333333	0.088953766	0.021288969	0.858613667
329	0.078864545	25	7.416666667	0.082651032	8	7.416666667	0.084506496	0.019080926	0.865733667
330	0.07853574	25	7.5	0.082742722	8	7.5	0.091597591	0.019914353	0.873273
331	0.078454321	25	7.583333333	0.083546392	8	7.583333333	0.646316896	0.413875793	0.151376333
332	0.078087931	25	7.666666667	0.083615343	8	7.666666667	0.552060508	0.349395567	0.142916333
333	0.078326302	25	7.75	0.083832102	8	7.75	0.697311529	0.44838525	0.168230333
334	0.078237981	25	7.833333333	0.084098367	8	7.833333333	0.607560018	0.393008524	0.171752
335	0.078206543	25	7.916666667	0.084118589	8	7.916666667	0.540525188	0.344359442	0.178818
336	0.078315349	25	8	0.084018683	8	8	0.648450296	0.423552973	0.203221333
337	0.078255647	25	8.083333333	0.083525421	8	8.083333333	0.495795711	0.314485028	0.194476667
338	0.077883044	25	8.166666667	0.083842523	8	8.166666667	0.532609927	0.343165912	0.210513333
339	0.078064707	25	8.25	0.083808121	8	8.25	0.428735526	0.271589056	0.223608667
340	0.078477104	25	8.333333333	0.083422385	8	8.333333333	0.483367491	0.310761982	0.237267333
341	0.078877169	25	8.416666667	0.083084057	8	8.416666667	0.523284598	0.338703373	0.253277667
342	0.078433376	25	8.5	0.083309605	8	8.5	0.396675315	0.251361674	0.254405
343	0.078479261	25	8.583333333	0.083167658	8	8.583333333	0.427384175	0.270649139	0.267795667
344	0.078179219	25	8.666666667	0.082867576	8	8.666666667	0.331045562	0.204080933	0.282141333
345	0.078145626	25	8.75	0.082378566	8	8.75	0.295263467	0.184911258	0.297095667
346	0.077910913	25	8.833333333	0.082309217	8	8.833333333	0.336693712	0.211258446	0.321364667
347	0.078134623	25	8.916666667	0.082340641	8	8.916666667	0.320619554	0.196235728	0.327677333
348	0.077955498	25	9	0.082970296	8	9	0.281774332	0.173974399	0.351005667
349	0.078306257	25	9.083333333	0.083316897	8	9.083333333	0.246073846	0.151146421	0.359190333
350	0.078447269	25	9.166666667	0.083149058	8	9.166666667	0.24602946	0.149552354	0.37902
351	0.078272067	25	9.25	0.082855712	8	9.25	0.248605696	0.146190253	0.400455333
352	0.078173239	25	9.333333333	0.08291046	8	9.333333333	0.256296662	0.150911792	0.415719667
353	0.078549319	25	9.416666667	0.083511671	8	9.416666667	0.229350358	0.131176277	0.429958333
354	0.078688786	25	9.5	0.083786894	8	9.5	0.235323598	0.137349347	0.456954
355	0.07829928	25	9.583333333	0.083858175	8	9.583333333	0.215066106	0.122066235	0.472189
356	0.07790446	25	9.666666667	0.083364258	8	9.666666667	0.205039226	0.114954222	0.487866667
357	0.077796921	25	9.75	0.08323805	8	9.75	0.197279982	0.109327667	0.504953
358	0.077452975	25	9.833333333	0.083284983	8	9.833333333	0.172707471	0.093968924	0.523013333
359	0.077355582	25	9.916666667	0.083680795	8	9.916666667	0.157954347	0.082874509	0.53579
360	0.077427101	25	10	0.083948027	8	10	0.145270235	0.074749806	0.556269
361	0.078622434	25	10.08333333	0.085812043	8	10.08333333	0.154600116	0.078701396	0.576516667
362	0.080649464	25	10.16666667	0.088005132	8	10.16666667	0.143449666	0.069507789	0.592144667
363	0.083177139	25	10.25	0.089870265	8	10.25	0.131368397	0.063872209	0.604864
364	0.085614911	25	10.33333333	0.092492385	8	10.33333333	0.146833558	0.069142036	0.62388
365	0.088233556	25	10.41666667	0.095422973	8	10.41666667	0.145152233	0.069982784	0.639724
366	0.090559408	25	10.5	0.097713676	8	10.5	0.134476788	0.06230061	0.655226333
367	0.093014656	25	10.58333333	0.100288083	8	10.58333333	0.124037834	0.054437508	0.672104
368	0.096107675	25	10.66666667	0.102751007	8	10.66666667	0.126564949	0.055091031	0.682458333
369	0.098956113	25	10.75	0.105627563	8	10.75	0.117525099	0.048105491	0.702671
370	0.101813661	25	10.83333333	0.107907368	8	10.83333333	0.11222592	0.045333333	0.711375
371	0.104851505	25	10.91666667	0.110736376	8	10.91666667	0.119731613	0.046293234	0.730668333
372	0.108264862	25	11	0.113392649	8	11	0.102923286	0.039240906	0.739899667
373	0.11203876	25	11.08333333	0.117099595	8	11.08333333	0.106362579	0.039109474	0.755239
374	0.115419665	25	11.16666667	0.120764362	8	11.16666667	0.106427226	0.037519276	0.770839333
375	0.119667212	25	11.25	0.124962082	8	11.25	0.098907048	0.03285884	0.777812
376	0.122734417	25	11.33333333	0.128675524	8	11.33333333	0.095837605	0.031059191	0.791531667
377	0.126443132	25	11.41666667	0.132318313	8	11.41666667	0.091530896	0.028457796	0.799991667
378	0.129953938	25	11.5	0.136001353	8	11.5	0.093329623	0.028670051	0.809823
379	0.133683914	25	11.58333333	0.140348585	8	11.58333333	0.093796006	0.026673329	0.823244333
380	0.137919743	25	11.66666667	0.144419914	8	11.66666667	0.091121687	0.025191069	0.830678
381	0.141666647	25	11.75	0.148834736	8	11.75	0.086903214	0.022384374	0.841643667
382	0.146178377	25	11.83333333	0.152211709	8	11.83333333	0.08886037	0.021987222	0.849675333
383	0.150637625	25	11.91666667	0.15580949	8	11.91666667	0.086884361	0.020230417	0.859168333
384	0.155900181	25	12	0.160151572	8	12	0.089303362	0.019719146	0.867448
385	0.16025548	25	12.08333333	0.164567386	8	12.08333333	0.086057045	0.018080873	0.874644333
386	0.164995342	25	12.16666667	0.168244701	8	12.16666667	0.665066275	0.433567102	0.153380333
387	0.169957949	25	12.25	0.171887381	8	12.25	0.68988535	0.448613184	0.154803
388	0.175212977	25	12.33333333	0.176041174	8	12.33333333	0.586370132	0.374079348	0.160348333
389	0.179795938	25	12.41666667	0.180693978	8	12.41666667	0.525796113	0.334379535	0.164935333
390	0.184836459	25	12.5	0.184785633	8	12.5	0.514528207	0.327725203	0.175023667
391	0.19017076	25	12.58333333	0.189462448	8	12.58333333	0.524328174	0.333209625	0.188615
392	0.195770203	25	12.66666667	0.1947707	8	12.66666667	0.62074325	0.402280656	0.206578
393	0.20101437	25	12.75	0.198506135	8	12.75	0.524564117	0.338795894	0.207717
394	0.207687533	25	12.83333333	0.203618276	8	12.83333333	0.500114493	0.322003376	0.230264667
395	0.213105508	25	12.91666667	0.209008787	8	12.91666667	0.449648543	0.286632411	0.232046333
396	0.218396619	25	13	0.215122008	8	13	0.432143447	0.277912548	0.248845667
397	0.223832213	25	13.08333333	0.220924166	8	13.08333333	0.430377774	0.274819988	0.255677667
398	0.229323577	25	13.16666667	0.226541951	8	13.16666667	0.381508125	0.240822691	0.265519
399	0.235035764	25	13.25	0.232671038	8	13.25	0.346215737	0.216923691	0.282377333
400	0.240777964	25	13.33333333	0.239477277	8	13.33333333	0.286711889	0.178537308	0.302497
401	0.247278995	25	13.41666667	0.245290529	8	13.41666667	0.293149125	0.180683552	0.320248667
402	0.253237152	25	13.5	0.251836451	8	13.5	0.291191501	0.180941065	0.328797667
403	0.258841703	25	13.58333333	0.258514942	8	13.58333333	0.290327002	0.177123482	0.353119
404	0.265556385	25	13.66666667	0.265282006	8	13.66666667	0.27764554	0.169870179	0.361703667
405	0.273012026	25	13.75	0.272246765	8	13.75	0.246494865	0.147554019	0.377708
406	0.278787463	25	13.83333333	0.279672372	8	13.83333333	0.250915662	0.148508896	0.400642667
407	0.285245145	25	13.91666667	0.286928289	8	13.91666667	0.235981817	0.138607239	0.411135333
408	0.29226214	25	14	0.293936952	8	14	0.222501158	0.128286676	0.428041333
409	0.299112256	25	14.08333333	0.300517945	8	14.08333333	0.240503001	0.139541813	0.456465333
410	0.306549322	25	14.16666667	0.307722857	8	14.16666667	0.186163065	0.104703843	0.465073667
411	0.314258721	25	14.25	0.314602272	8	14.25	0.211510755	0.118756263	0.491325667
412	0.321796261	25	14.33333333	0.321978513	8	14.33333333	0.196819585	0.10905972	0.504066333
413	0.329677646	25	14.41666667	0.329626881	8	14.41666667	0.16838007	0.091202022	0.519721667
414	0.338702419	25	14.5	0.337653789	8	14.5	0.169904891	0.092515907	0.541896
415	0.346270348	25	14.58333333	0.345515324	8	14.58333333	0.158304772	0.082428959	0.558642667
416	0.35422741	25	14.66666667	0.353575008	8	14.66666667	0.143682287	0.071993386	0.578150333
417	0.363375097	25	14.75	0.362815695	8	14.75	0.14554566	0.071779614	0.591774333
418	0.370639526	25	14.83333333	0.369526383	8	14.83333333	0.132429259	0.065124398	0.605154667
419	0.379483903	25	14.91666667	0.378127529	8	14.91666667	0.157291229	0.074047604	0.629176333
420	0.387675721	25	15	0.386289908	8	15	0.136010888	0.063066919	0.637915
421	0.396127329	25	15.08333333	0.394141154	8	15.08333333	0.132836009	0.060688655	0.655268
422	0.404888196	25	15.16666667	0.402670524	8	15.16666667	0.124851991	0.055678109	0.670155667
423	0.414076353	25	15.25	0.410643064	8	15.25	0.112775516	0.048098975	0.683833
424	0.423573429	25	15.33333333	0.418879059	8	15.33333333	0.116374925	0.047834962	0.703174667
425	0.432425365	25	15.41666667	0.426717461	8	15.41666667	0.11340836	0.046147526	0.712360333
426	0.440764707	25	15.5	0.433952287	8	15.5	0.115014775	0.044511363	0.730023333
427	0.449887048	25	15.58333333	0.441610348	8	15.58333333	0.115726295	0.044146088	0.740949
428	0.458959786	25	15.66666667	0.450318032	8	15.66666667	0.109851237	0.040689971	0.752708
429	0.467814765	25	15.75	0.459515128	8	15.75	0.105684719	0.037003421	0.773072667
430	0.477368626	25	15.83333333	0.468419843	8	15.83333333	0.095396284	0.032106539	0.778605667
431	0.486185717	25	15.91666667	0.477330057	8	15.91666667	0.104268663	0.033862354	0.79266
432	0.495978477	25	16	0.485940592	8	16	0.096929147	0.030879142	0.801857333
433	0.505605963	25	16.08333333	0.495750502	8	16.08333333	0.096386381	0.028693496	0.810636667
434	0.514437593	25	16.16666667	0.503691257	8	16.16666667	0.093537833	0.027033487	0.821401
435	0.524327409	25	16.25	0.513187885	8	16.25	0.090862587	0.024326877	0.830754667
436	0.534495085	25	16.33333333	0.521629279	8	16.33333333	0.090056486	0.022905255	0.841844667
437	0.544079203	25	16.41666667	0.530438197	8	16.41666667	0.092170336	0.023797316	0.851650667
438	0.553276947	25	16.5	0.538368996	8	16.5	0.09074153	0.022133851	0.857916667
439	0.563078631	25	16.58333333	0.547286993	8	16.58333333	0.087802119	0.02003239	0.866313667
440	0.571880496	25	16.66666667	0.556268128	8	16.66666667	0.086166835	0.018880649	0.870927
441	0.581185165	25	16.75	0.564023946	8	16.75	0.606081851	0.386898745	0.144108333
442	0.590160709	25	16.83333333	0.572184585	8	16.83333333	0.748282131	0.488449612	0.159201
443	0.598870466	25	16.91666667	0.581354286	8	16.91666667	0.558481774	0.355037958	0.160442
444	0.607800715	25	17	0.589562575	8	17	0.598275795	0.388472922	0.168594333
445	0.61758539	25	17.08333333	0.598743297	8	17.08333333	0.604996407	0.388347179	0.184327333
446	0.626337505	25	17.16666667	0.608326211	8	17.16666667	0.479616386	0.305550618	0.185655
447	0.63549613	25	17.25	0.617117636	8	17.25	0.505538942	0.326055249	0.203396
448	0.64405279	25	17.33333333	0.625654634	8	17.33333333	0.565602189	0.366878927	0.213364667
449	0.653536062	25	17.41666667	0.634718447	8	17.41666667	0.46145019	0.294406355	0.225684667
450	0.662328581	25	17.5	0.642973304	8	17.5	0.442446879	0.282384379	0.230522667
451	0.671183558	25	17.58333333	0.651043268	8	17.58333333	0.524931806	0.341360771	0.257976333
452	0.679642309	25	17.66666667	0.659873711	8	17.66666667	0.493215338	0.315900989	0.263042333
453	0.689325959	25	17.75	0.668572796	8	17.75	0.390408071	0.247900469	0.266369
454	0.697833494	25	17.83333333	0.676813657	8	17.83333333	0.388700599	0.242616451	0.284991667
455	0.706389073	25	17.91666667	0.685257358	8	17.91666667	0.337055893	0.211115992	0.301265667
456	0.715525405	25	18	0.694205692	8	18	0.347122294	0.215758409	0.323378667
457	0.724560772	25	18.08333333	0.702781995	8	18.08333333	0.300324122	0.185046651	0.326611333
458	0.73284301	25	18.16666667	0.710571341	8	18.16666667	0.31297013	0.191700549	0.352280333
459	0.741101244	25	18.25	0.718528495	8	18.25	0.295045772	0.179684148	0.364369
460	0.747816447	25	18.33333333	0.726542716	8	18.33333333	0.274251056	0.164699447	0.381446333
461	0.755506269	25	18.41666667	0.734306329	8	18.41666667	0.251935832	0.149680076	0.401293667
462	0.762333753	25	18.5	0.741288485	8	18.5	0.267609716	0.158790397	0.411418667
463	0.769975211	25	18.58333333	0.748744753	8	18.58333333	0.249959103	0.149539357	0.430232333
464	0.777010159	25	18.66666667	0.756261411	8	18.66666667	0.208544591	0.118543658	0.451991
465	0.784005201	25	18.75	0.763263817	8	18.75	0.196209456	0.110629757	0.466354333
466	0.790277992	25	18.83333333	0.76953737	8	18.83333333	0.183172611	0.100078567	0.488756
467	0.796707085	25	18.91666667	0.776390979	8	18.91666667	0.208262902	0.115746137	0.506761333
468	0.803590284	25	19	0.782572833	8	19	0.197150809	0.108328357	0.521891667
469	0.810503935	25	19.08333333	0.789518686	8	19.08333333	0.174983947	0.093571382	0.545508667
470	0.816594384	25	19.16666667	0.796435918	8	19.16666667	0.161277367	0.083358903	0.557293
471	0.823422407	25	19.25	0.803032804	8	19.25	0.167070327	0.085725006	0.578337667
472	0.829996691	25	19.33333333	0.809553132	8	19.33333333	0.149629159	0.076562529	0.590127667
473	0.83638813	25	19.41666667	0.816311098	8	19.41666667	0.147976271	0.072343994	0.605445333
474	0.842247465	25	19.5	0.822906193	8	19.5	0.135808634	0.063583464	0.626520333
475	0.8482249	25	19.58333333	0.829066143	8	19.58333333	0.133824004	0.063382072	0.639923333
476	0.853087894	25	19.66666667	0.83446462	8	19.66666667	0.121103551	0.055409062	0.655446333
477	0.858160795	25	19.75	0.840503252	8	19.75	0.130969716	0.058982671	0.672604333
478	0.863131115	25	19.83333333	0.845774821	8	19.83333333	0.122836349	0.052501204	0.682644667
479	0.867836767	25	19.91666667	0.8510043	8	19.91666667	0.11024124	0.045676557	0.701096333
480	0.873452421	25	20	0.856626257	8	20	0.103504859	0.041852086	0.71325
481	0.080210156	60	0.083333333	0.119421842	2	0.083333333	0.110691109	0.042973605	0.729525333
482	0.080369591	60	0.166666667	0.119425435	2	0.166666667	0.114222991	0.04307435	0.741733
483	0.080460862	60	0.25	0.119664442	2	0.25	0.098472477	0.036485899	0.755451667
484	0.080320458	60	0.333333333	0.119853522	2	0.333333333	0.105536253	0.036521837	0.770598333
485	0.080228756	60	0.416666667	0.120033303	2	0.416666667	0.100010824	0.033058095	0.779123333
486	0.08023418	60	0.5	0.120202242	2	0.5	0.099368614	0.032488985	0.791827333
487	0.080384338	60	0.583333333	0.121360528	2	0.583333333	0.095941801	0.030156799	0.801345
488	0.080406731	60	0.666666667	0.121943129	2	0.666666667	0.093250777	0.027961177	0.806833
489	0.080757488	60	0.75	0.122075197	2	0.75	0.094527094	0.027272687	0.825099
490	0.080769549	60	0.833333333	0.122468148	2	0.833333333	0.094887338	0.026438056	0.832953333
491	0.080890367	60	0.916666667	0.122602338	2	0.916666667	0.088934336	0.02265087	0.841925
492	0.081120364	60	1	0.122652653	2	1	0.088561192	0.022136603	0.851576
493	0.081264004	60	1.083333333	0.122864798	2	1.083333333	0.090361101	0.022066315	0.857491
494	0.081439467	60	1.166666667	0.123146979	2	1.166666667	0.085317139	0.018919683	0.866505
495	0.081233115	60	1.25	0.122820527	2	1.25	0.08630716	0.019180778	0.871688667
496	0.081452867	60	1.333333333	0.122309017	2	1.333333333	0.707590337	0.45914869	0.157702
497	0.081730285	60	1.416666667	0.122021608	2	1.416666667	0.721364747	0.464771762	0.152983333
498	0.081951816	60	1.5	0.122346424	2	1.5	0.583504953	0.374049386	0.162570333
499	0.08217133	60	1.583333333	0.123011976	2	1.583333333	0.53519278	0.337145355	0.163955
500	0.082258277	60	1.666666667	0.123458665	2	1.666666667	0.595547583	0.382792157	0.184598
501	0.082277029	60	1.75	0.123683925	2	1.75	0.533286237	0.339418219	0.186381667
502	0.08250144	60	1.833333333	0.124140855	2	1.833333333	0.594665288	0.385258206	0.204068333
503	0.082472862	60	1.916666667	0.124237833	2	1.916666667	0.486751169	0.313323864	0.204397667
504	0.082221868	60	2	0.124028503	2	2	0.426470261	0.268897641	0.223021667
505	0.082052718	60	2.083333333	0.123472876	2	2.083333333	0.396291073	0.250431482	0.223261333
506	0.082031482	60	2.166666667	0.12320575	2	2.166666667	0.489794418	0.311394866	0.250686
507	0.081713584	60	2.25	0.123234609	2	2.25	0.396396878	0.248544347	0.252006
508	0.081738265	60	2.333333333	0.12285463	2	2.333333333	0.495941966	0.319047752	0.273570333
509	0.081602496	60	2.416666667	0.122261831	2	2.416666667	0.384847793	0.244795422	0.283820667
510	0.081613598	60	2.5	0.121901739	2	2.5	0.32493621	0.202157037	0.299114
511	0.081601028	60	2.583333333	0.120938253	2	2.583333333	0.324697596	0.201760255	0.323854667
512	0.081542057	60	2.666666667	0.121009731	2	2.666666667	0.315837312	0.194628287	0.326264667
513	0.081355795	60	2.75	0.120498309	2	2.75	0.305753133	0.190492938	0.349726
514	0.081045828	60	2.833333333	0.119672896	2	2.833333333	0.283562769	0.172552203	0.360913
515	0.08075243	60	2.916666667	0.119477438	2	2.916666667	0.286790533	0.171261327	0.382787333
516	0.080979285	60	3	0.119242414	2	3	0.280324868	0.167446275	0.399630667
517	0.08087593	60	3.083333333	0.119346648	2	3.083333333	0.247187231	0.146286176	0.413069333
518	0.081113654	60	3.166666667	0.118829016	2	3.166666667	0.206326968	0.120606761	0.429713333
519	0.080887431	60	3.25	0.11809012	2	3.25	0.192657151	0.110793401	0.454293
520	0.080937381	60	3.333333333	0.117711944	2	3.333333333	0.205647292	0.115875824	0.468754667
521	0.080975484	60	3.416666667	0.117787198	2	3.416666667	0.19019477	0.10597409	0.490535
522	0.080914628	60	3.5	0.118409392	2	3.5	0.178028714	0.098878149	0.502295
523	0.08109385	60	3.583333333	0.118313483	2	3.583333333	0.174134877	0.095031703	0.524814333
524	0.081052845	60	3.666666667	0.118767827	2	3.666666667	0.161261233	0.085359808	0.539895
525	0.081051565	60	3.75	0.118249155	2	3.75	0.167393092	0.08752492	0.559951
526	0.080964295	60	3.833333333	0.118383128	2	3.833333333	0.152571026	0.078302861	0.575062
527	0.080744708	60	3.916666667	0.118370197	2	3.916666667	0.155418637	0.077975262	0.592978667
528	0.08040576	60	4	0.119176277	2	4	0.131245045	0.063853849	0.603064667
529	0.080232	60	4.083333333	0.118935055	2	4.083333333	0.145116709	0.069639542	0.626942667
530	0.080175358	60	4.166666667	0.118742059	2	4.166666667	0.148246299	0.068355806	0.640589333
531	0.079920279	60	4.25	0.11910153	2	4.25	0.128417397	0.055826869	0.655520667
532	0.079789038	60	4.333333333	0.118679715	2	4.333333333	0.123536941	0.054310315	0.672174333
533	0.079941297	60	4.416666667	0.117857359	2	4.416666667	0.118844887	0.050890048	0.681574
534	0.079921482	60	4.5	0.117253515	2	4.5	0.114832886	0.048095614	0.703411333
535	0.079856077	60	4.583333333	0.116458085	2	4.583333333	0.104756927	0.041978103	0.712871667
536	0.079828338	60	4.666666667	0.115546675	2	4.666666667	0.115093228	0.044007149	0.730161667
537	0.080111729	60	4.75	0.11518882	2	4.75	0.098355732	0.037300696	0.740576
538	0.079955071	60	4.833333333	0.1148319	2	4.833333333	0.104355862	0.038572381	0.754477667
539	0.079910273	60	4.916666667	0.114444636	2	4.916666667	0.097111072	0.034119638	0.770143
540	0.079838628	60	5	0.114520236	2	5	0.102918523	0.035015745	0.780572667
541	0.079803869	60	5.083333333	0.113853426	2	5.083333333	0.104425162	0.033685263	0.79372
542	0.079778029	60	5.166666667	0.113725309	2	5.166666667	0.09452059	0.029490801	0.803674333
543	0.079793333	60	5.25	0.113311829	2	5.25	0.094529195	0.027508362	0.807887667
544	0.07948437	60	5.333333333	0.112532948	2	5.333333333	0.091945629	0.025784498	0.822458
545	0.079416693	60	5.416666667	0.112184882	2	5.416666667	0.092539407	0.025270903	0.832156
546	0.079417336	60	5.5	0.112607192	2	5.5	0.09198594	0.024751958	0.842802
547	0.079237033	60	5.583333333	0.112228814	2	5.583333333	0.091586027	0.022658336	0.851018667
548	0.078998507	60	5.666666667	0.112005465	2	5.666666667	0.086984387	0.020526442	0.859265667
549	0.078947707	60	5.75	0.111837625	2	5.75	0.085744322	0.018920432	0.865413667
550	0.078695624	60	5.833333333	0.112290139	2	5.833333333	0.090841988	0.018473707	0.872519333
	0.078307692	60	5.916666667	0.112084891	2	5.916666667
	0.078113764	60	6	0.112490591	2	6
	0.077767556	60	6.083333333	0.113124645	2	6.083333333
	0.077502972	60	6.166666667	0.11351743	2	6.166666667
	0.077241296	60	6.25	0.113853871	2	6.25
	0.076806007	60	6.333333333	0.11414671	2	6.333333333
	0.076555743	60	6.416666667	0.114206349	2	6.416666667
	0.07662462	60	6.5	0.114142889	2	6.5
	0.076709004	60	6.583333333	0.114681047	2	6.583333333
	0.076744396	60	6.666666667	0.11451337	2	6.666666667
	0.076964968	60	6.75	0.114827201	2	6.75
	0.076883252	60	6.833333333	0.114145469	2	6.833333333
	0.076900535	60	6.916666667	0.113943277	2	6.916666667
	0.076904148	60	7	0.113079198	2	7
	0.077050332	60	7.083333333	0.112862874	2	7.083333333
	0.077283321	60	7.166666667	0.112642994	2	7.166666667
	0.077323378	60	7.25	0.112721579	2	7.25
	0.077169017	60	7.333333333	0.112416637	2	7.333333333
	0.077392234	60	7.416666667	0.112422459	2	7.416666667
	0.077646953	60	7.5	0.111678827	2	7.5
	0.077725015	60	7.583333333	0.11202526	2	7.583333333
	0.077798433	60	7.666666667	0.113158186	2	7.666666667
	0.077795513	60	7.75	0.113584025	2	7.75
	0.077775375	60	7.833333333	0.114245247	2	7.833333333
	0.077628527	60	7.916666667	0.114710573	2	7.916666667
	0.077748032	60	8	0.115620656	2	8
	0.077633261	60	8.083333333	0.115737264	2	8.083333333
	0.077539409	60	8.166666667	0.115596497	2	8.166666667
	0.077599839	60	8.25	0.114983111	2	8.25
	0.077793868	60	8.333333333	0.114600248	2	8.333333333
	0.077816925	60	8.416666667	0.114519449	2	8.416666667
	0.078100562	60	8.5	0.114653723	2	8.5
	0.078182465	60	8.583333333	0.115226122	2	8.583333333
	0.078216118	60	8.666666667	0.115744026	2	8.666666667
	0.078393106	60	8.75	0.116195061	2	8.75
	0.078356798	60	8.833333333	0.117148016	2	8.833333333
	0.078345822	60	8.916666667	0.117109	2	8.916666667
	0.078442028	60	9	0.117133291	2	9
	0.078523458	60	9.083333333	0.117291283	2	9.083333333
	0.078542946	60	9.166666667	0.117340618	2	9.166666667
	0.078613197	60	9.25	0.116803551	2	9.25
	0.078579385	60	9.333333333	0.116506448	2	9.333333333
	0.078664464	60	9.416666667	0.116352382	2	9.416666667
	0.079099044	60	9.5	0.11680575	2	9.5
	0.079210421	60	9.583333333	0.117040882	2	9.583333333
	0.07926069	60	9.666666667	0.11732231	2	9.666666667
	0.079072461	60	9.75	0.117331367	2	9.75
	0.079233356	60	9.833333333	0.118023393	2	9.833333333
	0.079058539	60	9.916666667	0.118604824	2	9.916666667
	0.079123405	60	10	0.118222963	2	10
	0.079573442	60	10.08333333	0.121754427	2	10.08333333
	0.080186625	60	10.16666667	0.125346492	2	10.16666667
	0.080908653	60	10.25	0.129308917	2	10.25
	0.081970248	60	10.33333333	0.133950551	2	10.33333333
	0.082843418	60	10.41666667	0.137722391	2	10.41666667
	0.083513633	60	10.5	0.142077209	2	10.5
	0.084450513	60	10.58333333	0.146200885	2	10.58333333
	0.08533925	60	10.66666667	0.150386887	2	10.66666667
	0.086192656	60	10.75	0.155576285	2	10.75
	0.087381748	60	10.83333333	0.160168666	2	10.83333333
	0.088458538	60	10.91666667	0.165309234	2	10.91666667
	0.089373172	60	11	0.170591724	2	11
	0.090442845	60	11.08333333	0.174973357	2	11.08333333
	0.091417894	60	11.16666667	0.179882802	2	11.16666667
	0.092447601	60	11.25	0.184949153	2	11.25
	0.093520237	60	11.33333333	0.190552159	2	11.33333333
	0.094576398	60	11.41666667	0.195268525	2	11.41666667
	0.095503956	60	11.5	0.200104549	2	11.5
	0.096419922	60	11.58333333	0.205064897	2	11.58333333
	0.097434536	60	11.66666667	0.210861174	2	11.66666667
	0.098366441	60	11.75	0.216129273	2	11.75
	0.099418839	60	11.83333333	0.221620384	2	11.83333333
	0.100625647	60	11.91666667	0.227439859	2	11.91666667
	0.101697639	60	12	0.233770464	2	12
	0.103033717	60	12.08333333	0.239830231	2	12.08333333
	0.103974388	60	12.16666667	0.246211603	2	12.16666667
	0.105029008	60	12.25	0.251634091	2	12.25
	0.106346617	60	12.33333333	0.258754464	2	12.33333333
	0.107141388	60	12.41666667	0.265149576	2	12.41666667
	0.108227369	60	12.5	0.272353889	2	12.5
	0.109507928	60	12.58333333	0.279383208	2	12.58333333
	0.110543848	60	12.66666667	0.287152854	2	12.66666667
	0.111814481	60	12.75	0.293900329	2	12.75
	0.113254433	60	12.83333333	0.300245716	2	12.83333333
	0.114482764	60	12.91666667	0.306876827	2	12.91666667
	0.115763563	60	13	0.314651501	2	13
	0.117032833	60	13.08333333	0.321705577	2	13.08333333
	0.118686269	60	13.16666667	0.328896728	2	13.16666667
	0.120180923	60	13.25	0.335266028	2	13.25
	0.121378565	60	13.33333333	0.342226673	2	13.33333333
	0.122695431	60	13.41666667	0.349808784	2	13.41666667
	0.123847874	60	13.5	0.358041688	2	13.5
	0.125189414	60	13.58333333	0.366215104	2	13.58333333
	0.126341772	60	13.66666667	0.373664901	2	13.66666667
	0.127670261	60	13.75	0.382076781	2	13.75
	0.128940225	60	13.83333333	0.390935008	2	13.83333333
	0.130262153	60	13.91666667	0.39904074	2	13.91666667
	0.131923132	60	14	0.407776806	2	14
	0.133118295	60	14.08333333	0.416462241	2	14.08333333
	0.13459116	60	14.16666667	0.425854808	2	14.16666667
	0.135996712	60	14.25	0.43475885	2	14.25
	0.13763225	60	14.33333333	0.444345587	2	14.33333333
	0.139579048	60	14.41666667	0.453243526	2	14.41666667
	0.141165055	60	14.5	0.462571092	2	14.5
	0.14258582	60	14.58333333	0.471068697	2	14.58333333
	0.143927816	60	14.66666667	0.480442437	2	14.66666667
	0.144911237	60	14.75	0.489637854	2	14.75
	0.146231429	60	14.83333333	0.499275156	2	14.83333333
	0.147677208	60	14.91666667	0.508847716	2	14.91666667
	0.14905965	60	15	0.519006614	2	15
	0.150902344	60	15.08333333	0.52760898	2	15.08333333
	0.15241642	60	15.16666667	0.536953602	2	15.16666667
	0.153958949	60	15.25	0.546599088	2	15.25
	0.155382354	60	15.33333333	0.555993132	2	15.33333333
	0.156897558	60	15.41666667	0.565273009	2	15.41666667
	0.158397764	60	15.5	0.574743824	2	15.5
	0.160046599	60	15.58333333	0.585634624	2	15.58333333
	0.161828037	60	15.66666667	0.595302274	2	15.66666667
	0.163350077	60	15.75	0.60558655	2	15.75
	0.164886355	60	15.83333333	0.614685574	2	15.83333333
	0.166515331	60	15.91666667	0.624521013	2	15.91666667
	0.168331731	60	16	0.633457901	2	16
	0.169757848	60	16.08333333	0.643579977	2	16.08333333
	0.171285814	60	16.16666667	0.652024689	2	16.16666667
	0.172786893	60	16.25	0.66164621	2	16.25
	0.174770493	60	16.33333333	0.669139567	2	16.33333333
	0.176510602	60	16.41666667	0.67833988	2	16.41666667
	0.17830426	60	16.5	0.68712425	2	16.5
	0.180178141	60	16.58333333	0.695934205	2	16.58333333
	0.182222347	60	16.66666667	0.704406657	2	16.66666667
	0.18381873	60	16.75	0.713911008	2	16.75
	0.185565203	60	16.83333333	0.721804758	2	16.83333333
	0.187496563	60	16.91666667	0.729288726	2	16.91666667
	0.188989694	60	17	0.737059762	2	17
	0.190382916	60	17.08333333	0.744772281	2	17.08333333
	0.19203069	60	17.16666667	0.751727961	2	17.16666667
	0.193965957	60	17.25	0.759231998	2	17.25
	0.195725898	60	17.33333333	0.766130229	2	17.33333333
	0.198013605	60	17.41666667	0.773422384	2	17.41666667
	0.199975748	60	17.5	0.780308136	2	17.5
	0.201751874	60	17.58333333	0.788374867	2	17.58333333
	0.204021329	60	17.66666667	0.79486835	2	17.66666667
	0.206235008	60	17.75	0.801950257	2	17.75
	0.208555096	60	17.83333333	0.809129227	2	17.83333333
	0.210920287	60	17.91666667	0.816038444	2	17.91666667
	0.213625556	60	18	0.822479015	2	18
	0.216180447	60	18.08333333	0.829062032	2	18.08333333
	0.21863532	60	18.16666667	0.835270729	2	18.16666667
	0.220959403	60	18.25	0.840729798	2	18.25
	0.222810803	60	18.33333333	0.846265044	2	18.33333333
	0.22509166	60	18.41666667	0.852371914	2	18.41666667
	0.22733177	60	18.5	0.857302335	2	18.5
	0.22991891	60	18.58333333	0.862439678	2	18.58333333
	0.232332092	60	18.66666667	0.867084447	2	18.66666667
	0.23486861	60	18.75	0.871838896	2	18.75
	0.237784347	60	18.83333333	0.876183815	2	18.83333333
	0.240333213	60	18.91666667	0.881170581	2	18.91666667
	0.24267078	60	19	0.885515566	2	19
	0.24543175	60	19.08333333	0.890252822	2	19.08333333
	0.247737306	60	19.16666667	0.894291092	2	19.16666667
	0.250096388	60	19.25	0.898158432	2	19.25
	0.252255777	60	19.33333333	0.902316954	2	19.33333333
	0.254592453	60	19.41666667	0.906184398	2	19.41666667
	0.256821264	60	19.5	0.909807431	2	19.5
	0.259730041	60	19.58333333	0.91350875	2	19.58333333
	0.262219339	60	19.66666667	0.917470228	2	19.66666667
	0.265219092	60	19.75	0.921194263	2	19.75
	0.267804832	60	19.83333333	0.924020032	2	19.83333333
	0.270762489	60	19.91666667	0.927028257	2	19.91666667
	0.27343805	60	20	0.929707537	2	20
