# Supplementary material for: Modelling the drivers of the spread of Plasmodium falciparum hrp2 gene deletions in sub-Saharan Africa
Source: eLife journal article supplement (doi:10.7554/elife.25008), 2017-08-24
Supplement: supp [file elife-25008-supp-v2.zip › elife_poa_e25008_Figure_2_source_data_1.csv]

FigA		Years until 20% infected with only hrp2 deletions	PfPR	ft	PfPR_grouped	lessthan5	20+	FigB		Years.until.20..infected.with.only.hrp2.deletions	hrp2d	PfPR	ft	PfPR_grouped	lessthan5	20+
	1	7.016666667	0.146567347	0.2	0.0 - 0.15	FALSE	NA		1	9.8	0.791875705	0.146567347	0.2	0.0 - 0.15	FALSE	NA
	2	7.675	0.161381224	0.2	0.15 - 0.2	FALSE	NA		2	10.4	0.777524134	0.161381224	0.2	0.15 - 0.2	FALSE	NA
	3	7.116666667	0.168063061	0.2	0.15 - 0.2	FALSE	NA		3	9.625	0.812524605	0.168063061	0.2	0.15 - 0.2	FALSE	NA
	4	7.383333333	0.180549592	0.2	0.15 - 0.2	FALSE	NA		4	11.325	0.714424617	0.180549592	0.2	0.15 - 0.2	FALSE	NA
	5	7.633333333	0.182137823	0.2	0.15 - 0.2	FALSE	NA		5	9.816666667	0.788224451	0.182137823	0.2	0.15 - 0.2	FALSE	NA
	6	7.975	0.205185238	0.2	0.2 - 0.25	FALSE	NA		6	11.10833333	0.706512768	0.205185238	0.2	0.2 - 0.25	FALSE	NA
	7	8.516666667	0.209392721	0.2	0.2 - 0.25	FALSE	NA		7	10.88333333	0.745375321	0.209392721	0.2	0.2 - 0.25	FALSE	NA
	8	8.825	0.224990068	0.2	0.2 - 0.25	FALSE	NA		8	10.68333333	0.712926717	0.224990068	0.2	0.2 - 0.25	FALSE	NA
	9	8.466666667	0.242270408	0.2	0.2 - 0.25	FALSE	NA		9	11.63333333	0.675682291	0.242270408	0.2	0.2 - 0.25	FALSE	NA
	10	8.941666667	0.250225578	0.2	0.25 - 0.3	FALSE	NA		10	12.85	0.616850937	0.250225578	0.2	0.25 - 0.3	FALSE	NA
	11	10.25833333	0.269463741	0.2	0.25 - 0.3	FALSE	NA		11	12.28333333	0.620512218	0.269463741	0.2	0.25 - 0.3	FALSE	NA
	12	9.7	0.279845578	0.2	0.25 - 0.3	FALSE	NA		12	13.58333333	0.563207506	0.279845578	0.2	0.25 - 0.3	FALSE	NA
	13	10.53333333	0.294668231	0.2	0.25 - 0.3	FALSE	NA		13	14.625	0.525231953	0.294668231	0.2	0.25 - 0.3	FALSE	NA
	14	10.95	0.310011769	0.2	0.3 - 0.35	FALSE	NA		14	14.39166667	0.539210948	0.310011769	0.2	0.3 - 0.35	FALSE	NA
	15	10.98333333	0.32523415	0.2	0.3 - 0.35	FALSE	NA		15	14.41666667	0.526550462	0.32523415	0.2	0.3 - 0.35	FALSE	NA
	16	11.76666667	0.34836068	0.2	0.3 - 0.35	FALSE	NA		16	15.70833333	0.477900391	0.34836068	0.2	0.3 - 0.35	FALSE	NA
	17	12.43333333	0.362602245	0.2	0.35 - 0.4	FALSE	NA		17	17.15	0.420037016	0.362602245	0.2	0.35 - 0.4	FALSE	NA
	18	13.73333333	0.381713673	0.2	0.35 - 0.4	FALSE	NA		18	16.875	0.427550729	0.381713673	0.2	0.35 - 0.4	FALSE	NA
	19	14.45833333	0.401017551	0.2	0.4 - 0.45	FALSE	NA		19	NA	0.400001114	0.401017551	0.2	0.4 - 0.45	NA	NA
	20	14.11666667	0.417933537	0.2	0.4 - 0.45	FALSE	NA		20	NA	0.37194786	0.417933537	0.2	0.4 - 0.45	NA	NA
	21	16.54166667	0.44222102	0.2	0.4 - 0.45	FALSE	NA		21	NA	0.356966356	0.44222102	0.2	0.4 - 0.45	NA	NA
	22	16.33333333	0.455614082	0.2	0.45 - 0.5	FALSE	NA		22	NA	0.314094955	0.455614082	0.2	0.45 - 0.5	NA	NA
	23	16.43333333	0.473554966	0.2	0.45 - 0.5	FALSE	NA		23	NA	0.319206139	0.473554966	0.2	0.45 - 0.5	NA	NA
	24	NA	0.490999048	0.2	0.45 - 0.5	NA	NA		24	NA	0.276096259	0.490999048	0.2	0.45 - 0.5	NA	NA
	25	NA	0.50013068	0.2	0.5 - 0.55	NA	NA		25	NA	0.288108397	0.50013068	0.2	0.5 - 0.55	NA	NA
	26	NA	0.531823401	0.2	0.5 - 0.55	NA	NA		26	NA	0.257503029	0.531823401	0.2	0.5 - 0.55	NA	NA
	27	NA	0.549528639	0.2	0.5 - 0.55	NA	NA		27	NA	0.218459678	0.549528639	0.2	0.5 - 0.55	NA	NA
	28	NA	0.55994932	0.2	0.55 - 0.6	NA	NA		28	NA	0.217081407	0.55994932	0.2	0.55 - 0.6	NA	NA
	29	NA	0.58271551	0.2	0.55 - 0.6	NA	NA		29	NA	0.20464869	0.58271551	0.2	0.55 - 0.6	NA	NA
	30	NA	0.594771905	0.2	0.55 - 0.6	NA	NA		30	NA	0.2036449	0.594771905	0.2	0.55 - 0.6	NA	NA
	31	NA	0.614812381	0.2	0.6 - 0.65	NA	NA		31	NA	0.195875598	0.614812381	0.2	0.6 - 0.65	NA	NA
	32	NA	0.629918231	0.2	0.6 - 0.65	NA	NA		32	NA	0.192962434	0.629918231	0.2	0.6 - 0.65	NA	NA
	33	NA	0.647138844	0.2	0.6 - 0.65	NA	NA		33	NA	0.167088511	0.647138844	0.2	0.6 - 0.65	NA	NA
	34	NA	0.669324762	0.2	0.65 - 0.7	NA	NA		34	NA	0.160287136	0.669324762	0.2	0.65 - 0.7	NA	NA
	35	NA	0.682761293	0.2	0.65 - 0.7	NA	NA		35	NA	0.154996361	0.682761293	0.2	0.65 - 0.7	NA	NA
	36	NA	0.701075918	0.2	0.7 - 0.75	NA	NA		36	NA	0.150006705	0.701075918	0.2	0.7 - 0.75	NA	NA
	37	NA	0.713292177	0.2	0.7 - 0.75	NA	NA		37	NA	0.139982519	0.713292177	0.2	0.7 - 0.75	NA	NA
	38	NA	0.723303333	0.2	0.7 - 0.75	NA	NA		38	NA	0.133704919	0.723303333	0.2	0.7 - 0.75	NA	NA
	39	NA	0.743146531	0.2	0.7 - 0.75	NA	NA		39	NA	0.134022925	0.743146531	0.2	0.7 - 0.75	NA	NA
	40	NA	0.75485415	0.2	0.75 - 0.8	NA	NA		40	NA	0.125260039	0.75485415	0.2	0.75 - 0.8	NA	NA
	41	NA	0.769008912	0.2	0.75 - 0.8	NA	NA		41	NA	0.11680864	0.769008912	0.2	0.75 - 0.8	NA	NA
	42	NA	0.777992313	0.2	0.75 - 0.8	NA	NA		42	NA	0.117870841	0.777992313	0.2	0.75 - 0.8	NA	NA
	43	NA	0.788118707	0.2	0.75 - 0.8	NA	NA		43	NA	0.113918543	0.788118707	0.2	0.75 - 0.8	NA	NA
	44	NA	0.804062245	0.2	0.8 - 1.0	NA	NA		44	NA	0.114295139	0.804062245	0.2	0.8 - 1.0	NA	NA
	45	NA	0.814685238	0.2	0.8 - 1.0	NA	NA		45	NA	0.110773673	0.814685238	0.2	0.8 - 1.0	NA	NA
	46	NA	0.827327619	0.2	0.8 - 1.0	NA	NA		46	NA	0.10815848	0.827327619	0.2	0.8 - 1.0	NA	NA
	47	NA	0.836064082	0.2	0.8 - 1.0	NA	NA		47	NA	0.105232327	0.836064082	0.2	0.8 - 1.0	NA	NA
	48	NA	0.843468231	0.2	0.8 - 1.0	NA	NA		48	NA	0.099717938	0.843468231	0.2	0.8 - 1.0	NA	NA
	49	NA	0.856123197	0.2	0.8 - 1.0	NA	NA		49	NA	0.097237478	0.856123197	0.2	0.8 - 1.0	NA	NA
	50	NA	0.862204966	0.2	0.8 - 1.0	NA	NA		50	NA	0.096225191	0.862204966	0.2	0.8 - 1.0	NA	NA
	51	NA	0.873972449	0.2	0.8 - 1.0	NA	NA		51	NA	0.095215709	0.873972449	0.2	0.8 - 1.0	NA	NA
	52	NA	0.881794558	0.2	0.8 - 1.0	NA	NA		52	NA	0.093083877	0.881794558	0.2	0.8 - 1.0	NA	NA
	53	NA	0.88524449	0.2	0.8 - 1.0	NA	NA		53	NA	0.093376845	0.88524449	0.2	0.8 - 1.0	NA	NA
	54	NA	0.893824354	0.2	0.8 - 1.0	NA	NA		54	NA	0.093121677	0.893824354	0.2	0.8 - 1.0	NA	NA
	55	NA	0.900816735	0.2	0.8 - 1.0	NA	NA		55	NA	0.091578211	0.900816735	0.2	0.8 - 1.0	NA	NA
	56	4.208333333	0.124137143	0.3	0.0 - 0.15	TRUE	NA		56	5.716666667	0.988512052	0.124137143	0.3	0.0 - 0.15	FALSE	NA
	57	4.533333333	0.138422449	0.3	0.0 - 0.15	TRUE	NA		57	6.35	0.979221871	0.138422449	0.3	0.0 - 0.15	FALSE	NA
	58	4.791666667	0.147763129	0.3	0.0 - 0.15	TRUE	NA		58	5.9	0.984890178	0.147763129	0.3	0.0 - 0.15	FALSE	NA
	59	4.666666667	0.154789932	0.3	0.15 - 0.2	TRUE	NA		59	6.458333333	0.97809409	0.154789932	0.3	0.15 - 0.2	FALSE	NA
	60	4.733333333	0.166474354	0.3	0.15 - 0.2	TRUE	NA		60	6.025	0.979447003	0.166474354	0.3	0.15 - 0.2	FALSE	NA
	61	4.858333333	0.177265102	0.3	0.15 - 0.2	TRUE	NA		61	6.308333333	0.971651739	0.177265102	0.3	0.15 - 0.2	FALSE	NA
	62	5.025	0.185258435	0.3	0.15 - 0.2	FALSE	NA		62	7.041666667	0.96769296	0.185258435	0.3	0.15 - 0.2	FALSE	NA
	63	5.408333333	0.203472245	0.3	0.2 - 0.25	FALSE	NA		63	7.233333333	0.959520347	0.203472245	0.3	0.2 - 0.25	FALSE	NA
	64	5.766666667	0.215259456	0.3	0.2 - 0.25	FALSE	NA		64	6.758333333	0.961165068	0.215259456	0.3	0.2 - 0.25	FALSE	NA
	65	5.541666667	0.22270585	0.3	0.2 - 0.25	FALSE	NA		65	7.375	0.946073723	0.22270585	0.3	0.2 - 0.25	FALSE	NA
	66	5.825	0.243715782	0.3	0.2 - 0.25	FALSE	NA		66	7.75	0.93281544	0.243715782	0.3	0.2 - 0.25	FALSE	NA
	67	5.983333333	0.255060068	0.3	0.25 - 0.3	FALSE	NA		67	8.416666667	0.914939749	0.255060068	0.3	0.25 - 0.3	FALSE	NA
	68	6.666666667	0.27059034	0.3	0.25 - 0.3	FALSE	NA		68	8.741666667	0.893220707	0.27059034	0.3	0.25 - 0.3	FALSE	NA
	69	6.05	0.283307959	0.3	0.25 - 0.3	FALSE	NA		69	9	0.883196642	0.283307959	0.3	0.25 - 0.3	FALSE	NA
	70	7.35	0.299163401	0.3	0.25 - 0.3	FALSE	NA		70	9.425	0.850657271	0.299163401	0.3	0.25 - 0.3	FALSE	NA
	71	7.108333333	0.322249932	0.3	0.3 - 0.35	FALSE	NA		71	9.683333333	0.830651274	0.322249932	0.3	0.3 - 0.35	FALSE	NA
	72	7.266666667	0.333072517	0.3	0.3 - 0.35	FALSE	NA		72	9.583333333	0.837456254	0.333072517	0.3	0.3 - 0.35	FALSE	NA
	73	7.825	0.352676327	0.3	0.35 - 0.4	FALSE	NA		73	10.53333333	0.778450386	0.352676327	0.3	0.35 - 0.4	FALSE	NA
	74	8.4	0.37477619	0.3	0.35 - 0.4	FALSE	NA		74	10.73333333	0.744651084	0.37477619	0.3	0.35 - 0.4	FALSE	NA
	75	8.566666667	0.382118503	0.3	0.35 - 0.4	FALSE	NA		75	11.925	0.695843385	0.382118503	0.3	0.35 - 0.4	FALSE	NA
	76	9.091666667	0.405535578	0.3	0.4 - 0.45	FALSE	NA		76	12.65	0.653018628	0.405535578	0.3	0.4 - 0.45	FALSE	NA
	77	9.85	0.42763619	0.3	0.4 - 0.45	FALSE	NA		77	13.23333333	0.616921956	0.42763619	0.3	0.4 - 0.45	FALSE	NA
	78	10.68333333	0.438010408	0.3	0.4 - 0.45	FALSE	NA		78	13.95833333	0.581834539	0.438010408	0.3	0.4 - 0.45	FALSE	NA
	79	11.025	0.462680408	0.3	0.45 - 0.5	FALSE	NA		79	15.075	0.516664438	0.462680408	0.3	0.45 - 0.5	FALSE	NA
	80	11.30833333	0.481708231	0.3	0.45 - 0.5	FALSE	NA		80	15.09166667	0.520410562	0.481708231	0.3	0.45 - 0.5	FALSE	NA
	81	12.65	0.503884626	0.3	0.5 - 0.55	FALSE	NA		81	16.86666667	0.452958325	0.503884626	0.3	0.5 - 0.55	FALSE	NA
	82	12.725	0.516929048	0.3	0.5 - 0.55	FALSE	NA		82	17.75833333	0.426640844	0.516929048	0.3	0.5 - 0.55	FALSE	NA
	83	13.61666667	0.535336054	0.3	0.5 - 0.55	FALSE	NA		83	NA	0.422270935	0.535336054	0.3	0.5 - 0.55	NA	NA
	84	14.88333333	0.558422449	0.3	0.55 - 0.6	FALSE	NA		84	NA	0.356994285	0.558422449	0.3	0.55 - 0.6	NA	NA
	85	16.16666667	0.570121497	0.3	0.55 - 0.6	FALSE	NA		85	NA	0.336829491	0.570121497	0.3	0.55 - 0.6	NA	NA
	86	17.075	0.591365782	0.3	0.55 - 0.6	FALSE	NA		86	NA	0.316218347	0.591365782	0.3	0.55 - 0.6	NA	NA
	87	NA	0.60744517	0.3	0.6 - 0.65	NA	NA		87	NA	0.2816685	0.60744517	0.3	0.6 - 0.65	NA	NA
	88	NA	0.624036667	0.3	0.6 - 0.65	NA	NA		88	NA	0.261682723	0.624036667	0.3	0.6 - 0.65	NA	NA
	89	NA	0.643392449	0.3	0.6 - 0.65	NA	NA		89	NA	0.244811982	0.643392449	0.3	0.6 - 0.65	NA	NA
	90	NA	0.657753605	0.3	0.65 - 0.7	NA	NA		90	NA	0.23591279	0.657753605	0.3	0.65 - 0.7	NA	NA
	91	NA	0.676209932	0.3	0.65 - 0.7	NA	NA		91	NA	0.211284137	0.676209932	0.3	0.65 - 0.7	NA	NA
	92	NA	0.686528299	0.3	0.65 - 0.7	NA	NA		92	NA	0.190620421	0.686528299	0.3	0.65 - 0.7	NA	NA
	93	NA	0.703541837	0.3	0.7 - 0.75	NA	NA		93	NA	0.184492195	0.703541837	0.3	0.7 - 0.75	NA	NA
	94	NA	0.714518639	0.3	0.7 - 0.75	NA	NA		94	NA	0.182031149	0.714518639	0.3	0.7 - 0.75	NA	NA
	95	NA	0.730577211	0.3	0.7 - 0.75	NA	NA		95	NA	0.173283373	0.730577211	0.3	0.7 - 0.75	NA	NA
	96	NA	0.746492585	0.3	0.7 - 0.75	NA	NA		96	NA	0.157511391	0.746492585	0.3	0.7 - 0.75	NA	NA
	97	NA	0.756442245	0.3	0.75 - 0.8	NA	NA		97	NA	0.158363579	0.756442245	0.3	0.75 - 0.8	NA	NA
	98	NA	0.771479864	0.3	0.75 - 0.8	NA	NA		98	NA	0.143735203	0.771479864	0.3	0.75 - 0.8	NA	NA
	99	NA	0.78471932	0.3	0.75 - 0.8	NA	NA		99	NA	0.133823478	0.78471932	0.3	0.75 - 0.8	NA	NA
	100	NA	0.794892993	0.3	0.75 - 0.8	NA	NA		100	NA	0.127612822	0.794892993	0.3	0.75 - 0.8	NA	NA
	101	NA	0.807460884	0.3	0.8 - 1.0	NA	NA		101	NA	0.125720097	0.807460884	0.3	0.8 - 1.0	NA	NA
	102	NA	0.817240952	0.3	0.8 - 1.0	NA	NA		102	NA	0.121795212	0.817240952	0.3	0.8 - 1.0	NA	NA
	103	NA	0.823005918	0.3	0.8 - 1.0	NA	NA		103	NA	0.11902751	0.823005918	0.3	0.8 - 1.0	NA	NA
	104	NA	0.837288571	0.3	0.8 - 1.0	NA	NA		104	NA	0.111938475	0.837288571	0.3	0.8 - 1.0	NA	NA
	105	NA	0.844655578	0.3	0.8 - 1.0	NA	NA		105	NA	0.112666746	0.844655578	0.3	0.8 - 1.0	NA	NA
	106	NA	0.85440415	0.3	0.8 - 1.0	NA	NA		106	NA	0.106828456	0.85440415	0.3	0.8 - 1.0	NA	NA
	107	NA	0.86362381	0.3	0.8 - 1.0	NA	NA		107	NA	0.101993589	0.86362381	0.3	0.8 - 1.0	NA	NA
	108	NA	0.87048034	0.3	0.8 - 1.0	NA	NA		108	NA	0.098867953	0.87048034	0.3	0.8 - 1.0	NA	NA
	109	NA	0.879698503	0.3	0.8 - 1.0	NA	NA		109	NA	0.100301022	0.879698503	0.3	0.8 - 1.0	NA	NA
	110	NA	0.885409048	0.3	0.8 - 1.0	NA	NA		110	NA	0.095524575	0.885409048	0.3	0.8 - 1.0	NA	NA
	111	2.891666667	0.105223878	0.4	0.0 - 0.15	TRUE	NA		111	3.708333333	0.999520784	0.105223878	0.4	0.0 - 0.15	TRUE	NA
	113	3.016666667	0.117610544	0.4	0.0 - 0.15	TRUE	NA		113	4.116666667	0.999018231	0.117610544	0.4	0.0 - 0.15	TRUE	NA
	114	2.983333333	0.127335714	0.4	0.0 - 0.15	TRUE	NA		114	4.083333333	0.999632989	0.127335714	0.4	0.0 - 0.15	TRUE	NA
	115	3.1	0.138823605	0.4	0.0 - 0.15	TRUE	NA		115	4.033333333	0.999065105	0.138823605	0.4	0.0 - 0.15	TRUE	NA
	116	3.1	0.15312034	0.4	0.15 - 0.2	TRUE	NA		116	4.283333333	0.99839068	0.15312034	0.4	0.15 - 0.2	TRUE	NA
	117	3.208333333	0.161006531	0.4	0.15 - 0.2	TRUE	NA		117	4.3	0.998843715	0.161006531	0.4	0.15 - 0.2	TRUE	NA
	118	3.508333333	0.173282245	0.4	0.15 - 0.2	TRUE	NA		118	4.508333333	0.998294525	0.173282245	0.4	0.15 - 0.2	TRUE	NA
	119	3.741666667	0.192176531	0.4	0.15 - 0.2	TRUE	NA		119	4.691666667	0.997852452	0.192176531	0.4	0.15 - 0.2	TRUE	NA
	120	3.741666667	0.197445238	0.4	0.15 - 0.2	TRUE	NA		120	5.133333333	0.995991588	0.197445238	0.4	0.15 - 0.2	FALSE	NA
	121	3.816666667	0.207332245	0.4	0.2 - 0.25	TRUE	NA		121	5	0.996190115	0.207332245	0.4	0.2 - 0.25	FALSE	NA
	122	4.041666667	0.232042109	0.4	0.2 - 0.25	TRUE	NA		122	5.358333333	0.996249184	0.232042109	0.4	0.2 - 0.25	FALSE	NA
	123	4.391666667	0.240703401	0.4	0.2 - 0.25	TRUE	NA		123	5.916666667	0.990992421	0.240703401	0.4	0.2 - 0.25	FALSE	NA
	124	4.508333333	0.265057347	0.4	0.25 - 0.3	TRUE	NA		124	6.191666667	0.987102559	0.265057347	0.4	0.25 - 0.3	FALSE	NA
	125	4.508333333	0.269531224	0.4	0.25 - 0.3	TRUE	NA		125	5.758333333	0.990581549	0.269531224	0.4	0.25 - 0.3	FALSE	NA
	126	4.716666667	0.288972517	0.4	0.25 - 0.3	TRUE	NA		126	6.375	0.982144627	0.288972517	0.4	0.25 - 0.3	FALSE	NA
	127	4.991666667	0.309722313	0.4	0.3 - 0.35	TRUE	NA		127	6.758333333	0.980263999	0.309722313	0.4	0.3 - 0.35	FALSE	NA
	128	5.441666667	0.324299864	0.4	0.3 - 0.35	FALSE	NA		128	6.883333333	0.972074804	0.324299864	0.4	0.3 - 0.35	FALSE	NA
	129	5.466666667	0.345743265	0.4	0.3 - 0.35	FALSE	NA		129	7.833333333	0.953734898	0.345743265	0.4	0.3 - 0.35	FALSE	NA
	130	5.825	0.359151973	0.4	0.35 - 0.4	FALSE	NA		130	7.933333333	0.945757735	0.359151973	0.4	0.35 - 0.4	FALSE	NA
	131	6.558333333	0.383774694	0.4	0.35 - 0.4	FALSE	NA		131	8.566666667	0.922085076	0.383774694	0.4	0.35 - 0.4	FALSE	NA
	132	6.716666667	0.396121088	0.4	0.35 - 0.4	FALSE	NA		132	8.833333333	0.91277578	0.396121088	0.4	0.35 - 0.4	FALSE	NA
	133	7.108333333	0.414291429	0.4	0.4 - 0.45	FALSE	NA		133	9.35	0.878922158	0.414291429	0.4	0.4 - 0.45	FALSE	NA
	134	7.275	0.433492721	0.4	0.4 - 0.45	FALSE	NA		134	9.75	0.845793041	0.433492721	0.4	0.4 - 0.45	FALSE	NA
	135	7.941666667	0.453477415	0.4	0.45 - 0.5	FALSE	NA		135	10.88333333	0.786977661	0.453477415	0.4	0.45 - 0.5	FALSE	NA
	136	8.3	0.471538435	0.4	0.45 - 0.5	FALSE	NA		136	11.175	0.762067884	0.471538435	0.4	0.45 - 0.5	FALSE	NA
	137	8.916666667	0.493678435	0.4	0.45 - 0.5	FALSE	NA		137	12.60833333	0.68539801	0.493678435	0.4	0.45 - 0.5	FALSE	NA
	138	9.291666667	0.506555646	0.4	0.5 - 0.55	FALSE	NA		138	12.46666667	0.679270033	0.506555646	0.4	0.5 - 0.55	FALSE	NA
	139	10.225	0.526505238	0.4	0.5 - 0.55	FALSE	NA		139	13.78333333	0.611232663	0.526505238	0.4	0.5 - 0.55	FALSE	NA
	140	11.29166667	0.54888585	0.4	0.5 - 0.55	FALSE	NA		140	14.925	0.557100067	0.54888585	0.4	0.5 - 0.55	FALSE	NA
	141	11.90833333	0.565700884	0.4	0.55 - 0.6	FALSE	NA		141	15.81666667	0.511024164	0.565700884	0.4	0.55 - 0.6	FALSE	NA
	142	12.69166667	0.579185646	0.4	0.55 - 0.6	FALSE	NA		142	16.525	0.491015921	0.579185646	0.4	0.55 - 0.6	FALSE	NA
	143	13.725	0.594416531	0.4	0.55 - 0.6	FALSE	NA		143	17.61666667	0.449616495	0.594416531	0.4	0.55 - 0.6	FALSE	NA
	144	14.53333333	0.61571585	0.4	0.6 - 0.65	FALSE	NA		144	NA	0.382740978	0.61571585	0.4	0.6 - 0.65	NA	NA
	145	15.81666667	0.633161224	0.4	0.6 - 0.65	FALSE	NA		145	NA	0.367487411	0.633161224	0.4	0.6 - 0.65	NA	NA
	146	17.53333333	0.649836259	0.4	0.6 - 0.65	FALSE	NA		146	NA	0.337067968	0.649836259	0.4	0.6 - 0.65	NA	NA
	147	NA	0.666191905	0.4	0.65 - 0.7	NA	NA		147	NA	0.288531027	0.666191905	0.4	0.65 - 0.7	NA	NA
	148	NA	0.678238231	0.4	0.65 - 0.7	NA	NA		148	NA	0.28446514	0.678238231	0.4	0.65 - 0.7	NA	NA
	149	NA	0.695221633	0.4	0.65 - 0.7	NA	NA		149	NA	0.260772166	0.695221633	0.4	0.65 - 0.7	NA	NA
	150	NA	0.708864354	0.4	0.7 - 0.75	NA	NA		150	NA	0.240012463	0.708864354	0.4	0.7 - 0.75	NA	NA
	151	NA	0.724037483	0.4	0.7 - 0.75	NA	NA		151	NA	0.218242326	0.724037483	0.4	0.7 - 0.75	NA	NA
	152	NA	0.734787687	0.4	0.7 - 0.75	NA	NA		152	NA	0.217962889	0.734787687	0.4	0.7 - 0.75	NA	NA
	153	NA	0.746673401	0.4	0.7 - 0.75	NA	NA		153	NA	0.179117741	0.746673401	0.4	0.7 - 0.75	NA	NA
	154	NA	0.762752789	0.4	0.75 - 0.8	NA	NA		154	NA	0.178260383	0.762752789	0.4	0.75 - 0.8	NA	NA
	155	NA	0.77421619	0.4	0.75 - 0.8	NA	NA		155	NA	0.163885331	0.77421619	0.4	0.75 - 0.8	NA	NA
	156	NA	0.790143605	0.4	0.75 - 0.8	NA	NA		156	NA	0.154596346	0.790143605	0.4	0.75 - 0.8	NA	NA
	157	NA	0.797535238	0.4	0.75 - 0.8	NA	NA		157	NA	0.139234375	0.797535238	0.4	0.75 - 0.8	NA	NA
	158	NA	0.807869116	0.4	0.8 - 1.0	NA	NA		158	NA	0.138974499	0.807869116	0.4	0.8 - 1.0	NA	NA
	159	NA	0.819423401	0.4	0.8 - 1.0	NA	NA		159	NA	0.125816246	0.819423401	0.4	0.8 - 1.0	NA	NA
	160	NA	0.82828966	0.4	0.8 - 1.0	NA	NA		160	NA	0.127998457	0.82828966	0.4	0.8 - 1.0	NA	NA
	161	NA	0.839663946	0.4	0.8 - 1.0	NA	NA		161	NA	0.122109219	0.839663946	0.4	0.8 - 1.0	NA	NA
	162	NA	0.845736939	0.4	0.8 - 1.0	NA	NA		162	NA	0.115752001	0.845736939	0.4	0.8 - 1.0	NA	NA
	163	NA	0.853865714	0.4	0.8 - 1.0	NA	NA		163	NA	0.117600676	0.853865714	0.4	0.8 - 1.0	NA	NA
	164	NA	0.86327517	0.4	0.8 - 1.0	NA	NA		164	NA	0.110434763	0.86327517	0.4	0.8 - 1.0	NA	NA
	165	NA	0.870447143	0.4	0.8 - 1.0	NA	NA		165	NA	0.104677131	0.870447143	0.4	0.8 - 1.0	NA	NA
	167	1.85	0.086347891	0.5	0.0 - 0.15	TRUE	NA		167	2.758333333	0.99978955	0.086347891	0.5	0.0 - 0.15	TRUE	NA
	168	2.125	0.096728367	0.5	0.0 - 0.15	TRUE	NA		168	2.65	0.99998759	0.096728367	0.5	0.0 - 0.15	TRUE	NA
	169	1.991666667	0.109269048	0.5	0.0 - 0.15	TRUE	NA		169	2.666666667	1	0.109269048	0.5	0.0 - 0.15	TRUE	NA
	170	2.3	0.117255374	0.5	0.0 - 0.15	TRUE	NA		170	2.791666667	1	0.117255374	0.5	0.0 - 0.15	TRUE	NA
	171	2.425	0.135313401	0.5	0.0 - 0.15	TRUE	NA		171	3.35	0.999880988	0.135313401	0.5	0.0 - 0.15	TRUE	NA
	172	2.275	0.13663517	0.5	0.0 - 0.15	TRUE	NA		172	3	0.999990835	0.13663517	0.5	0.0 - 0.15	TRUE	NA
	173	2.366666667	0.142203401	0.5	0.0 - 0.15	TRUE	NA		173	3.075	0.999923558	0.142203401	0.5	0.0 - 0.15	TRUE	NA
	174	2.608333333	0.167571361	0.5	0.15 - 0.2	TRUE	NA		174	3.691666667	0.999977483	0.167571361	0.5	0.15 - 0.2	TRUE	NA
	175	2.858333333	0.173885102	0.5	0.15 - 0.2	TRUE	NA		175	3.55	0.999877191	0.173885102	0.5	0.15 - 0.2	TRUE	NA
	176	2.716666667	0.186988776	0.5	0.15 - 0.2	TRUE	NA		176	3.766666667	0.999793148	0.186988776	0.5	0.15 - 0.2	TRUE	NA
	177	2.8	0.195863741	0.5	0.15 - 0.2	TRUE	NA		177	3.858333333	0.999768436	0.195863741	0.5	0.15 - 0.2	TRUE	NA
	178	3.008333333	0.210501837	0.5	0.2 - 0.25	TRUE	NA		178	3.991666667	0.999478833	0.210501837	0.5	0.2 - 0.25	TRUE	NA
	179	3.291666667	0.227914286	0.5	0.2 - 0.25	TRUE	NA		179	4.283333333	0.999168327	0.227914286	0.5	0.2 - 0.25	TRUE	NA
	180	3.283333333	0.237929728	0.5	0.2 - 0.25	TRUE	NA		180	4.35	0.998752186	0.237929728	0.5	0.2 - 0.25	TRUE	NA
	181	3.533333333	0.260912041	0.5	0.25 - 0.3	TRUE	NA		181	4.908333333	0.997974653	0.260912041	0.5	0.25 - 0.3	TRUE	NA
	182	3.691666667	0.275470068	0.5	0.25 - 0.3	TRUE	NA		182	4.933333333	0.997782244	0.275470068	0.5	0.25 - 0.3	TRUE	NA
	183	3.883333333	0.297782993	0.5	0.25 - 0.3	TRUE	NA		183	5.166666667	0.99714693	0.297782993	0.5	0.25 - 0.3	FALSE	NA
	184	4.033333333	0.316153129	0.5	0.3 - 0.35	TRUE	NA		184	5.45	0.995430842	0.316153129	0.5	0.3 - 0.35	FALSE	NA
	185	4.283333333	0.331236463	0.5	0.3 - 0.35	TRUE	NA		185	5.633333333	0.994501795	0.331236463	0.5	0.3 - 0.35	FALSE	NA
	186	4.75	0.35073619	0.5	0.35 - 0.4	TRUE	NA		186	6.341666667	0.991176254	0.35073619	0.5	0.35 - 0.4	FALSE	NA
	187	4.791666667	0.363798095	0.5	0.35 - 0.4	TRUE	NA		187	6.591666667	0.987480826	0.363798095	0.5	0.35 - 0.4	FALSE	NA
	188	5.1	0.381900612	0.5	0.35 - 0.4	FALSE	NA		188	6.633333333	0.985762594	0.381900612	0.5	0.35 - 0.4	FALSE	NA
	189	5.391666667	0.405341633	0.5	0.4 - 0.45	FALSE	NA		189	7.333333333	0.976071716	0.405341633	0.5	0.4 - 0.45	FALSE	NA
	190	5.683333333	0.421591769	0.5	0.4 - 0.45	FALSE	NA		190	7.475	0.968356379	0.421591769	0.5	0.4 - 0.45	FALSE	NA
	191	6.241666667	0.447000816	0.5	0.4 - 0.45	FALSE	NA		191	8.341666667	0.945030545	0.447000816	0.5	0.4 - 0.45	FALSE	NA
	192	6.541666667	0.463375782	0.5	0.45 - 0.5	FALSE	NA		192	8.641666667	0.9251569	0.463375782	0.5	0.45 - 0.5	FALSE	NA
	193	6.7	0.47405483	0.5	0.45 - 0.5	FALSE	NA		193	9.333333333	0.912276404	0.47405483	0.5	0.45 - 0.5	FALSE	NA
	194	7.5	0.498430544	0.5	0.45 - 0.5	FALSE	NA		194	9.825	0.869006513	0.498430544	0.5	0.45 - 0.5	FALSE	NA
	195	8.158333333	0.519526599	0.5	0.5 - 0.55	FALSE	NA		195	10.94166667	0.810135071	0.519526599	0.5	0.5 - 0.55	FALSE	NA
	196	8.808333333	0.543234694	0.5	0.5 - 0.55	FALSE	NA		196	11.75	0.755525333	0.543234694	0.5	0.5 - 0.55	FALSE	NA
	197	9.075	0.54998	0.5	0.5 - 0.55	FALSE	NA		197	12.1	0.740755195	0.54998	0.5	0.5 - 0.55	FALSE	NA
	198	9.908333333	0.569007211	0.5	0.55 - 0.6	FALSE	NA		198	12.98333333	0.690777435	0.569007211	0.5	0.55 - 0.6	FALSE	NA
	199	11.04166667	0.594035782	0.5	0.55 - 0.6	FALSE	NA		199	15	0.580138503	0.594035782	0.5	0.55 - 0.6	FALSE	NA
	200	11.31666667	0.606362789	0.5	0.6 - 0.65	FALSE	NA		200	15.44166667	0.55836523	0.606362789	0.5	0.6 - 0.65	FALSE	NA
	201	12.71666667	0.622746531	0.5	0.6 - 0.65	FALSE	NA		201	16.75833333	0.509148789	0.622746531	0.5	0.6 - 0.65	FALSE	NA
	202	13.85833333	0.644447891	0.5	0.6 - 0.65	FALSE	NA		202	18.53333333	0.440628473	0.644447891	0.5	0.6 - 0.65	FALSE	NA
	203	14.61666667	0.651270408	0.5	0.65 - 0.7	FALSE	NA		203	NA	0.436202709	0.651270408	0.5	0.65 - 0.7	NA	NA
	204	16.125	0.672014354	0.5	0.65 - 0.7	FALSE	NA		204	NA	0.369411178	0.672014354	0.5	0.65 - 0.7	NA	NA
	205	17.69166667	0.686563333	0.5	0.65 - 0.7	FALSE	NA		205	NA	0.332592009	0.686563333	0.5	0.65 - 0.7	NA	NA
	206	19.31666667	0.702761973	0.5	0.7 - 0.75	FALSE	NA		206	NA	0.304672691	0.702761973	0.5	0.7 - 0.75	NA	NA
	207	NA	0.717467347	0.5	0.7 - 0.75	NA	NA		207	NA	0.26067433	0.717467347	0.5	0.7 - 0.75	NA	NA
	208	NA	0.730303946	0.5	0.7 - 0.75	NA	NA		208	NA	0.238778126	0.730303946	0.5	0.7 - 0.75	NA	NA
	209	NA	0.74660619	0.5	0.7 - 0.75	NA	NA		209	NA	0.215726213	0.74660619	0.5	0.7 - 0.75	NA	NA
	210	NA	0.754407687	0.5	0.75 - 0.8	NA	NA		210	NA	0.213699139	0.754407687	0.5	0.75 - 0.8	NA	NA
	211	NA	0.768558503	0.5	0.75 - 0.8	NA	NA		211	NA	0.191872439	0.768558503	0.5	0.75 - 0.8	NA	NA
	212	NA	0.779523469	0.5	0.75 - 0.8	NA	NA		212	NA	0.176421198	0.779523469	0.5	0.75 - 0.8	NA	NA
	213	NA	0.787462585	0.5	0.75 - 0.8	NA	NA		213	NA	0.170928853	0.787462585	0.5	0.75 - 0.8	NA	NA
	214	NA	0.802596531	0.5	0.8 - 1.0	NA	NA		214	NA	0.157858922	0.802596531	0.5	0.8 - 1.0	NA	NA
	215	NA	0.812511361	0.5	0.8 - 1.0	NA	NA		215	NA	0.147664067	0.812511361	0.5	0.8 - 1.0	NA	NA
	216	NA	0.822239456	0.5	0.8 - 1.0	NA	NA		216	NA	0.140586979	0.822239456	0.5	0.8 - 1.0	NA	NA
	217	NA	0.832708367	0.5	0.8 - 1.0	NA	NA		217	NA	0.129720411	0.832708367	0.5	0.8 - 1.0	NA	NA
	218	NA	0.838830952	0.5	0.8 - 1.0	NA	NA		218	NA	0.131552046	0.838830952	0.5	0.8 - 1.0	NA	NA
	219	NA	0.848878639	0.5	0.8 - 1.0	NA	NA		219	NA	0.118904296	0.848878639	0.5	0.8 - 1.0	NA	NA
	220	NA	0.85509483	0.5	0.8 - 1.0	NA	NA		220	NA	0.116791513	0.85509483	0.5	0.8 - 1.0	NA	NA
	221	1.366666667	0.061053197	0.6	0.0 - 0.15	TRUE	NA		221	1.991666667	1	0.061053197	0.6	0.0 - 0.15	TRUE	NA
	222	1.491666667	0.062460136	0.6	0.0 - 0.15	TRUE	NA		222	1.975	1	0.062460136	0.6	0.0 - 0.15	TRUE	NA
	223	1.508333333	0.07270415	0.6	0.0 - 0.15	TRUE	NA		223	1.991666667	1	0.07270415	0.6	0.0 - 0.15	TRUE	NA
	224	1.625	0.085857347	0.6	0.0 - 0.15	TRUE	NA		224	2.208333333	1	0.085857347	0.6	0.0 - 0.15	TRUE	NA
	225	1.566666667	0.087362925	0.6	0.0 - 0.15	TRUE	NA		225	2.133333333	1	0.087362925	0.6	0.0 - 0.15	TRUE	NA
	226	1.825	0.105988095	0.6	0.0 - 0.15	TRUE	NA		226	2.4	0.999989961	0.105988095	0.6	0.0 - 0.15	TRUE	NA
	228	1.708333333	0.12458415	0.6	0.0 - 0.15	TRUE	NA		228	2.358333333	1	0.12458415	0.6	0.0 - 0.15	TRUE	NA
	229	1.9	0.129839116	0.6	0.0 - 0.15	TRUE	NA		229	2.583333333	1	0.129839116	0.6	0.0 - 0.15	TRUE	NA
	230	2.091666667	0.151090204	0.6	0.15 - 0.2	TRUE	NA		230	2.725	1	0.151090204	0.6	0.15 - 0.2	TRUE	NA
	231	2.091666667	0.164604966	0.6	0.15 - 0.2	TRUE	NA		231	2.858333333	0.999932079	0.164604966	0.6	0.15 - 0.2	TRUE	NA
	232	2.283333333	0.180057347	0.6	0.15 - 0.2	TRUE	NA		232	2.933333333	1	0.180057347	0.6	0.15 - 0.2	TRUE	NA
	233	2.125	0.181858231	0.6	0.15 - 0.2	TRUE	NA		233	2.833333333	0.999992991	0.181858231	0.6	0.15 - 0.2	TRUE	NA
	234	2.208333333	0.199736939	0.6	0.15 - 0.2	TRUE	NA		234	3.075	0.999973936	0.199736939	0.6	0.15 - 0.2	TRUE	NA
	235	2.425	0.211469728	0.6	0.2 - 0.25	TRUE	NA		235	3.125	0.999984668	0.211469728	0.6	0.2 - 0.25	TRUE	NA
	236	2.75	0.237264014	0.6	0.2 - 0.25	TRUE	NA		236	3.516666667	0.999857665	0.237264014	0.6	0.2 - 0.25	TRUE	NA
	237	2.75	0.253668299	0.6	0.25 - 0.3	TRUE	NA		237	3.65	0.999995596	0.253668299	0.6	0.25 - 0.3	TRUE	NA
	238	3.025	0.268616327	0.6	0.25 - 0.3	TRUE	NA		238	3.9	0.999775042	0.268616327	0.6	0.25 - 0.3	TRUE	NA
	239	3	0.285717959	0.6	0.25 - 0.3	TRUE	NA		239	3.933333333	0.999732108	0.285717959	0.6	0.25 - 0.3	TRUE	NA
	240	3.191666667	0.298393129	0.6	0.25 - 0.3	TRUE	NA		240	4.241666667	0.99952328	0.298393129	0.6	0.25 - 0.3	TRUE	NA
	241	3.466666667	0.326683129	0.6	0.3 - 0.35	TRUE	NA		241	4.816666667	0.999059897	0.326683129	0.6	0.3 - 0.35	TRUE	NA
	242	3.675	0.339842993	0.6	0.3 - 0.35	TRUE	NA		242	4.925	0.998919303	0.339842993	0.6	0.3 - 0.35	TRUE	NA
	243	3.791666667	0.354698503	0.6	0.35 - 0.4	TRUE	NA		243	5.091666667	0.998121731	0.354698503	0.6	0.35 - 0.4	FALSE	NA
	244	3.966666667	0.374051156	0.6	0.35 - 0.4	TRUE	NA		244	5.366666667	0.996999354	0.374051156	0.6	0.35 - 0.4	FALSE	NA
	245	4.4	0.396515442	0.6	0.35 - 0.4	TRUE	NA		245	6.008333333	0.995160494	0.396515442	0.6	0.35 - 0.4	FALSE	NA
	246	4.733333333	0.418957007	0.6	0.4 - 0.45	TRUE	NA		246	6.483333333	0.991302949	0.418957007	0.6	0.4 - 0.45	FALSE	NA
	247	4.833333333	0.43311932	0.6	0.4 - 0.45	TRUE	NA		247	6.8	0.98755422	0.43311932	0.6	0.4 - 0.45	FALSE	NA
	248	5.175	0.451480952	0.6	0.45 - 0.5	FALSE	NA		248	6.975	0.982732462	0.451480952	0.6	0.45 - 0.5	FALSE	NA
	249	5.833333333	0.476840068	0.6	0.45 - 0.5	FALSE	NA		249	7.941666667	0.964945312	0.476840068	0.6	0.45 - 0.5	FALSE	NA
	250	6.033333333	0.490171565	0.6	0.45 - 0.5	FALSE	NA		250	8.091666667	0.960780245	0.490171565	0.6	0.45 - 0.5	FALSE	NA
	251	6.65	0.512596803	0.6	0.5 - 0.55	FALSE	NA		251	9.125	0.930495872	0.512596803	0.6	0.5 - 0.55	FALSE	NA
	252	7.058333333	0.529588776	0.6	0.5 - 0.55	FALSE	NA		252	9.325	0.91230776	0.529588776	0.6	0.5 - 0.55	FALSE	NA
	253	7.625	0.545654558	0.6	0.5 - 0.55	FALSE	NA		253	10.11666667	0.878854558	0.545654558	0.6	0.5 - 0.55	FALSE	NA
	254	8.266666667	0.568795646	0.6	0.55 - 0.6	FALSE	NA		254	11.35	0.806083522	0.568795646	0.6	0.55 - 0.6	FALSE	NA
	255	8.425	0.577040816	0.6	0.55 - 0.6	FALSE	NA		255	11.50833333	0.795980734	0.577040816	0.6	0.55 - 0.6	FALSE	NA
	256	9.508333333	0.60015932	0.6	0.6 - 0.65	FALSE	NA		256	12.73333333	0.723119761	0.60015932	0.6	0.6 - 0.65	FALSE	NA
	257	10.63333333	0.616764694	0.6	0.6 - 0.65	FALSE	NA		257	13.925	0.654269213	0.616764694	0.6	0.6 - 0.65	FALSE	NA
	258	11.25	0.632707619	0.6	0.6 - 0.65	FALSE	NA		258	15.375	0.578729285	0.632707619	0.6	0.6 - 0.65	FALSE	NA
	259	NA	0.67315649	0.6	0.65 - 0.7	NA	NA		259	16.83333333	0.522206115	0.653980884	0.6	0.65 - 0.7	FALSE	NA
	260	13.25833333	0.662456122	0.6	0.65 - 0.7	FALSE	NA		260	17.75833333	0.483693289	0.662456122	0.6	0.65 - 0.7	FALSE	NA
	261	14.975	0.682811497	0.6	0.65 - 0.7	FALSE	NA		261	NA	0.406137987	0.682811497	0.6	0.65 - 0.7	NA	NA
	262	15.9	0.692902177	0.6	0.65 - 0.7	FALSE	NA		262	NA	0.388440501	0.692902177	0.6	0.65 - 0.7	NA	NA
	263	17.45833333	0.706982653	0.6	0.7 - 0.75	FALSE	NA		263	NA	0.325523476	0.706982653	0.6	0.7 - 0.75	NA	NA
	264	NA	0.723975986	0.6	0.7 - 0.75	NA	NA		264	NA	0.301906873	0.723975986	0.6	0.7 - 0.75	NA	NA
	265	NA	0.734257551	0.6	0.7 - 0.75	NA	NA		265	NA	0.272803586	0.734257551	0.6	0.7 - 0.75	NA	NA
	266	NA	0.747147551	0.6	0.7 - 0.75	NA	NA		266	NA	0.257203746	0.747147551	0.6	0.7 - 0.75	NA	NA
	267	NA	0.761051361	0.6	0.75 - 0.8	NA	NA		267	NA	0.245295651	0.761051361	0.6	0.75 - 0.8	NA	NA
	268	NA	0.768987415	0.6	0.75 - 0.8	NA	NA		268	NA	0.209593232	0.768987415	0.6	0.75 - 0.8	NA	NA
	269	NA	0.718071782	0.6	0.7 - 0.75	NA	NA		269	NA	0.19961257	0.78267585	0.6	0.75 - 0.8	NA	NA
	270	NA	0.727805177	0.6	0.7 - 0.75	NA	NA		270	NA	0.177321941	0.792872041	0.6	0.75 - 0.8	NA	NA
	271	NA	0.806726871	0.6	0.8 - 1.0	NA	NA		271	NA	0.159892838	0.806726871	0.6	0.8 - 1.0	NA	NA
	272	NA	0.814804694	0.6	0.8 - 1.0	NA	NA		272	NA	0.153487375	0.814804694	0.6	0.8 - 1.0	NA	NA
	273	NA	0.823398571	0.6	0.8 - 1.0	NA	NA		273	NA	0.151461885	0.823398571	0.6	0.8 - 1.0	NA	NA
	274	NA	0.834522109	0.6	0.8 - 1.0	NA	NA		274	NA	0.133560096	0.834522109	0.6	0.8 - 1.0	NA	NA
	275	NA	0.840957619	0.6	0.8 - 1.0	NA	NA		275	NA	0.132924562	0.840957619	0.6	0.8 - 1.0	NA	NA
