# Supplementary material for: Modelling the drivers of the spread of Plasmodium falciparum hrp2 gene deletions in sub-Saharan Africa
Source: eLife journal article supplement (doi:10.7554/elife.25008), 2017-08-24
Supplement: supp [file elife-25008-supp-v2.zip › elife_poa_e25008_Figure_3_source_data_1.csv]

	Province	fT	PCR.05.U95	PCR.05.L95	propDel.U95	propDel.L95	PCR.05	propDel
1	Bas-Uele	0.2273998	79.1	54.9	1.8	0	68.2	0.2
2	Equateur	0.2976869	42.5	11.4	18.7	0.4	23.6	2.8
3	Haut-Katanga	0.3545706	47.8	19.1	10.5	1.1	31.7	3.5
4	Haut-Lomami	0.4172222	52.2	34	12.5	1	42.8	3.7
5	Haut-Uele	0.3517072	67.7	46.6	0	0	57.5	0
6	Ituri	0.2635474	57.8	30.6	19.7	6.4	43.7	11.5
7	Kasai	0.4324363	51.2	20.9	5.1	0.3	34.5	1.3
8	Kasai-Central	0.3143794	59.7	42.1	9.2	1.2	50.9	3.4
9	Kasai-Oriental	0.2954407	52.6	22.8	11.1	0.9	36.4	3.2
10	Kinshasa	0.3369646	32.1	19.9	32.8	13.9	25.6	21.9
11	Kongo Central	0.3903037	55.4	31.6	11.7	1.5	43.1	4.2
12	Kwango	0.5566261	27.4	13.3	27.4	5.4	19.4	12.8
13	Kwilu	0.3887891	24.9	14	8.2	1.1	18.9	3
14	Lomami	0.376923	73.3	52.7	5.9	0.5	63.6	1.8
15	Lualaba	0.3861111	59.9	30.8	25.5	1.1	44.9	5.7
16	Mai-Ndombe	0.4452413	56.8	31.9	29.6	2.6	44	9.6
17	Maniema	0.5813149	63.1	38	10	2.1	50.6	4.6
18	Mongala	0.4421296	45.7	28.3	19	0.9	36.6	4.4
19	North-Kivu	0.3588664	17.3	8.5	29.4	7.5	12.2	15.5
20	Nord-Ubangi	0.3719008	74.6	46.6	15.9	1.7	61.5	5.3
21	Sankuru	0.355222	48	12.2	33.8	5.6	26.4	14.8
22	South-Kivu	0.4035748	20	9.8	39.9	7.1	14.2	18.3
23	Sud-Ubangi	0.3225318	36.2	23.6	26.1	5.4	29.5	12.4
24	Tanganyka	0.3511891	75.9	45.1	9.5	0.3	61.7	1.7
25	Tshopo	0.4270562	54.6	36.3	12.3	1.5	45.3	4.5
26	Tshuapa	0.3619377	39.5	16.4	22.1	2.7	26.3	8.1
