# Supplementary material for: Modelling the drivers of the spread of Plasmodium falciparum hrp2 gene deletions in sub-Saharan Africa
Source: eLife journal article supplement (doi:10.7554/elife.25008), 2017-08-24
Supplement: supp [file elife-25008-supp-v2.zip › elife_poa_e25008_Figure_3_source_data_1_Sourced_from_doi:_10.1093/infdis/jiw538.xlsx]

## Sheet: JBParr
		Figure 3 - Source Data 1: Estimates of the proportion of pfhrp2-deleted mutants from a national study in DRC. Sourced from Parr JB, Verity R, Doctor SM, Janko M, Carey-Ewend K, Turman BJ, Keeler C, Slater HC, Whitesell AN, Mwandagalirwa K, Ghani AC, Likwela JL, Tshefu AK, Emch M, Juliano JJ, Meshnick SR. 2016. Pfhrp2-deleted Plasmodium falciparum parasites in the Democratic Republic of Congo: A n…
		Province	All subjects	All P. falciparum infections*	pfhrp2-deleted P. falciparum
				n (weighted prevalence [95% CI])
		Kinshasa	362	92 (25.6 [19.9,32.1])	20 (21.9 [13.9,32.8])
		Kwango	308	67 (19.4 [13.3,27.4])	9 (12.8 [5.4,27.4])
		Kwilu	360	70 (18.9 [14.0,24.9])	6 (3.0 [1.1,8.2])
		Mai-Ndombe	272	116 (44.0 [31.9,56.8])	4 (9.6 [2.6,29.6])
		Kongo Central	321	148 (43.1 [31.6,55.4])	6 (4.2 [1.5,11.7])
		Equateur	198	57 (23.6 [11.4,42.5])	3 (2.8 [0.4,18.7])
		Mongala	255	74 (36.6 [28.3,45.7])	5 (4.4 [0.9,19.0])
		Nord-Ubangi	231	143 (61.5 [46.6,74.6])	5 (5.3[1.7,15.9])
		Sud-Ubangi	276	86 (29.5 [23.6,36.2])	7 (12.4 [5.4,26.1])
		Tshuapa	205	56 (26.3 [16.4,39.5])	5 (8.1 [2.7,22.1])
		Kasai	310	118 (34.5 [20.9,51.2])	2 (1.3 [0.3,5.1])
		Kasai-Central	327	155 (50.9 [42.1,59.7])	3 (3.4 [1.2,9.2])
		Kasai-Oriental	255	106 (36.4 [22.8,52.6])	3 (3.2 [0.9,11.1])
		Lomami	351	221 (63.6 [52.7,73.3])	5 (1.8 [0.5,5.9])
		Sankuru	194	68 (26.4 [12.2,48.0])	6 (14.8 [5.6,33.8])
		Haut-Katanga	236	81 (31.7 [19.1,47.8])	3 (3.5 [1.1,10.5])
		Haut-Lomami	261	99 (42.8 [34.0,52.2])	3 (3.7 [1.0,12.5])
		Lualaba	176	87 (44.9 [30.8,59.9])	2 (5.7 [1.1,25.5])
		Tanganyka	245	157 (61.7 [45.1,75.9])	3 (1.7 [0.3,9.5])
		Maniema	349	182 (50.6 [38.0,63.1])	13 (4.6 [2.1,10.0])
		Nord-Kivu	426	72 (12.2 [8.5,17.3])	12 (15.5 [7.5,29.4])
		Bas-Uele	180	109 (68.2 [54.9,79.1])	1 (0.2[0,1.8])
		Haut-Uele	170	87 (57.5 [46.6,67.7])	0 (0[NA])
		Ituri	255	122 (43.7 [30.6,57.8])	9 (11.5 [6.4,19.7])
		Tshopo	225	106 (45.3 [36.3,54.6])	6 (4.5 [1.5,12.3])
		Sud-Kivu	389	73 (14.2 [9.8,20.0])	8 (18.3 [7.1,39.9]
				* Diagnosed by real-time PCR targeting the pfldh gene during initial screening, as previously described:
				Doctor SM, Liu Y, Whitesell A, et al. Malaria surveillance in the Democratic Republic of the Congo: Comparison of microscopy, PCR, and rapid diagnostic test. Diagn Microbiol Infect Dis 2016; 85:16-8.
