# Supplementary material for: Modelling the drivers of the spread of Plasmodium falciparum hrp2 gene deletions in sub-Saharan Africa
Source: eLife journal article supplement (doi:10.7554/elife.25008), 2017-08-24
Supplement: supp [file elife-25008-supp-v2.zip › elife_poa_e25008_Figure_4_source_data_1.csv]

	NAME	COUNTRY_ID	GAUL_CODE	Country	PfPR_2010	ft	hrp2_concern..High...4..Moderate...3..Slight...2..Marginal...1.	Years.at.which.20..population.only.infected.with.hrp2.deletions..NA.means..20..or.NA.due.to.no.malaria.prealence.
0	Administrative unit not available	SDN	124	Sudan	0.0443	0.390642	4	3.74546240108232
1	Adrar	DZA	341	NA	NA	NA	NA	NA
2	Ain-Defla	DZA	342	NA	NA	NA	NA	NA
3	Ain-Temouchent	DZA	343	NA	NA	NA	NA	NA
4	Alger	DZA	344	NA	NA	NA	NA	NA
5	Annaba	DZA	345	NA	NA	NA	NA	NA
6	Batna	DZA	346	NA	NA	NA	NA	NA
7	Bechar	DZA	347	NA	NA	NA	NA	NA
8	Bejaia	DZA	348	NA	NA	NA	NA	NA
9	Biskra	DZA	349	NA	NA	NA	NA	NA
10	Blida	DZA	350	NA	NA	NA	NA	NA
11	Bordj Bou Arrer	DZA	351	NA	NA	NA	NA	NA
12	Bouira	DZA	352	NA	NA	NA	NA	NA
13	Boumerdes	DZA	353	NA	NA	NA	NA	NA
14	Chlef	DZA	354	NA	NA	NA	NA	NA
15	Constantine	DZA	355	NA	NA	NA	NA	NA
16	Djelfa	DZA	356	NA	NA	NA	NA	NA
17	El Bayadh	DZA	357	NA	NA	NA	NA	NA
18	El Oued	DZA	358	NA	NA	NA	NA	NA
19	El-Tarf	DZA	359	NA	NA	NA	NA	NA
20	Ghardaia	DZA	360	NA	NA	NA	NA	NA
21	Guelma	DZA	361	NA	NA	NA	NA	NA
22	Illizi	DZA	362	NA	NA	NA	NA	NA
23	Jijel	DZA	363	NA	NA	NA	NA	NA
24	Khenchela	DZA	364	NA	NA	NA	NA	NA
25	Laghouat	DZA	365	NA	NA	NA	NA	NA
26	Mascara	DZA	366	NA	NA	NA	NA	NA
27	Medea	DZA	367	NA	NA	NA	NA	NA
28	Mila	DZA	368	NA	NA	NA	NA	NA
29	Mostaganem	DZA	369	NA	NA	NA	NA	NA
30	M'Sila	DZA	370	NA	NA	NA	NA	NA
31	Naama	DZA	371	NA	NA	NA	NA	NA
32	Oran	DZA	372	NA	NA	NA	NA	NA
33	Ouargla	DZA	373	NA	NA	NA	NA	NA
34	Oum El Bouaghi	DZA	374	NA	NA	NA	NA	NA
35	Relizane	DZA	375	NA	NA	NA	NA	NA
36	Saida	DZA	376	NA	NA	NA	NA	NA
37	Setif	DZA	377	NA	NA	NA	NA	NA
38	Sidi Bel Abbes	DZA	378	NA	NA	NA	NA	NA
39	Skikda	DZA	379	NA	NA	NA	NA	NA
40	Souk-Ahras	DZA	380	NA	NA	NA	NA	NA
41	Tamanrasset	DZA	381	NA	NA	NA	NA	NA
42	Tebessa	DZA	382	NA	NA	NA	NA	NA
43	Tindouf	DZA	383	NA	NA	NA	NA	NA
44	Tiaret	DZA	384	NA	NA	NA	NA	NA
45	Tipaza	DZA	385	NA	NA	NA	NA	NA
46	Tissemsilt	DZA	386	NA	NA	NA	NA	NA
47	Tizi Ouzou	DZA	387	NA	NA	NA	NA	NA
48	Tlemcen	DZA	388	NA	NA	NA	NA	NA
49	Bengo	AGO	398	Angola	0.1244	0.407833	4	4.52544654318848
50	Benguela	AGO	399	Angola	0.0607	0.240248	3	8.63770289117785
51	Bie	AGO	400	Angola	0.069	0.323525	4	5.0642216866792
52	Cabinda	AGO	401	Angola	0.142	0.375383	4	5.71092492817067
53	Cuando Cubango	AGO	402	Angola	0.0547	0.362102	4	4.29280025096551
54	Cuanza Sul	AGO	403	Angola	0.1465	0.270682	3	8.9391231120624
55	Cunene	AGO	404	Angola	0.0661	0.361567	4	4.30204232343629
56	Huambo	AGO	405	Angola	0.0295	0.342347	4	4.66842384100236
57	Huila	AGO	406	Angola	0.1043	0.275228	3	7.16890654298168
58	Kuanza Norte	AGO	407	Angola	0.2015	0.330498	3	8.93617604961584
59	Luanda	AGO	408	Angola	0.0244	0.281223	3	6.44038484172948
60	Lunda Norte	AGO	409	Angola	0.1327	0.468704	4	4.04129685258446
61	Lunda Sul	AGO	410	Angola	0.0836	0.419702	4	3.28300554225838
62	Malanje	AGO	411	Angola	0.2025	0.362025	3	8.22101066619945
63	Moxico	AGO	412	Angola	0.0823	0.349955	4	4.52457836466704
64	Namibe	AGO	413	Angola	0.0479	0.201517	3	11.3396426735083
65	Uige	AGO	414	Angola	0.0986	0.342235	4	4.91520182831564
66	Zaire	AGO	415	Angola	0.2886	0.435715	3	9.95910561809126
67	Alibori	BEN	609	Benin	0.4993	0.364492	1	NA
68	Atakora	BEN	610	Benin	0.6304	0.461653	1	NA
69	Atlantique	BEN	611	Benin	0.1747	0.408527	3	6.24761949886937
70	Borgou	BEN	612	Benin	0.4132	0.461578	2	17.0184680720491
71	Collines	BEN	613	Benin	0.3069	0.440808	3	10.739669385668
72	Couffo	BEN	614	Benin	0.2744	0.436174	3	9.30338488729119
73	Donga	BEN	615	Benin	0.5265	0.461653	1	NA
74	Littoral	BEN	616	Benin	0.0741	0.408527	4	3.45046841804404
75	Mono	BEN	617	Benin	0.2093	0.436174	3	6.9418696083092
76	Oueme	BEN	618	Benin	0.1286	0.419361	4	4.49522455287913
77	Plateau	BEN	619	Benin	0.2455	0.419361	3	8.58612857462004
78	Zou	BEN	620	Benin	0.27	0.440808	3	9.04487754344501
79	Central	BWA	654	Botswana	0.0102	0.304621	4	5.57583802866632
80	Chobe	BWA	655	Botswana	0.022	0.3046	4	5.57583802866632
81	Ghanzi	BWA	656	Botswana	0.0233	0.348363	4	4.55288618256554
82	Kgalagadi	BWA	657	Botswana	3e-04	0.29992	4	5.73524410043187
83	Kgatleng	BWA	658	Botswana	8e-04	0.270359	3	6.95236586989542
84	Kweneng	BWA	659	Botswana	0.01	0.314123	4	5.3032135829619
85	Ngamiland	BWA	660	Botswana	0.0164	0.3046	4	5.57583802866632
86	North East	BWA	661	Botswana	0.005	0.214898	3	10.3303018595951
87	South-East	BWA	662	Botswana	0.023	0.198	3	11.6112842023271
88	Southern	BWA	663	Botswana	0.0164	0.454359	4	2.88953804142398
89	Abim	UGA	743	Uganda	0.3622	0.355542	2	16.6878216253109
90	Amudat	UGA	744	Uganda	0.1083	0.355542	4	4.96961195951515
91	Amuru	UGA	745	Uganda	0.5347	0.355542	1	NA
92	Apac	UGA	746	Uganda	0.5959	0.355542	1	NA
93	Budaka	UGA	747	Uganda	0.5676	0.470204	1	NA
94	Bugiri	UGA	748	Uganda	0.7224	0.4572	1	NA
95	Buikwe	UGA	749	Uganda	0.4081	NA	NA	NA
96	Bukomansimbi	UGA	750	Uganda	0.5083	0.398838	1	NA
97	Bukwo	UGA	751	Uganda	0.0635	0.470204	4	2.75423407547294
98	Bulambuli	UGA	752	Uganda	0.2765	0.470204	3	8.77609368394325
99	Buliisa	UGA	753	Uganda	0.4224	0.380436	1	NA
100	Bundibugyo	UGA	754	Uganda	0.2308	0.380436	3	8.91151509364141
101	Bushenyi	UGA	755	Uganda	0.1281	0.260009	3	8.77819778490171
102	Buyende	UGA	756	Uganda	0.6194	0.4572	1	NA
103	Butambala	UGA	757	Uganda	0.3077	0.398838	3	11.8034276331736
104	Iganga	UGA	758	Uganda	0.7186	0.4572	1	NA
105	Kalungu	UGA	759	Uganda	0.4148	0.398838	2	18.9771319364287
106	Kamuli	UGA	760	Uganda	0.6448	0.4572	1	NA
107	Kapchorwa	UGA	761	Uganda	0.2148	0.470204	3	6.59690512768486
108	Sheema	UGA	762	Uganda	0.1316	0.260009	3	8.90924895799495
109	Kitgum	UGA	763	Uganda	0.3329	0.355542	2	14.6593404657961
110	Kole	UGA	764	Uganda	0.6258	0.355542	1	NA
111	Kotido	UGA	765	Uganda	0.1991	0.355542	3	8.24140797501556
112	Kween	UGA	766	Uganda	0.0849	0.470204	4	2.75423407547294
113	Lamwo	UGA	767	Uganda	0.3296	0.355542	2	14.4722422079138
114	Luuka	UGA	768	Uganda	0.6909	0.4572	1	NA
115	Manafwa	UGA	769	Uganda	0.3979	0.470204	2	15.6432036158943
116	Masaka	UGA	770	Uganda	0.3891	0.398838	2	17.0414135045406
117	Masindi	UGA	771	Uganda	0.469	0.380436	1	NA
118	Moroto	UGA	772	Uganda	0.1188	0.355542	4	5.28855326931907
119	Nakapiripirit	UGA	773	Uganda	0.1601	0.355542	3	6.74755275558898
120	Namutumba	UGA	774	Uganda	0.7246	0.4572	1	NA
121	Napak	UGA	775	Uganda	0.191	0.355542	3	7.90666398724238
122	Nebbi	UGA	776	Uganda	0.3394	0.425836	2	12.9324861175377
123	Ngora	UGA	777	Uganda	0.434	0.470204	2	18.3965377705165
124	Buhweju	UGA	778	Uganda	0.1049	0.260009	3	7.94646519458493
125	Ntoroko	UGA	779	Uganda	0.2325	0.380436	3	8.99374494110286
126	Maracha	UGA	780	Uganda	0.5064	0.425836	1	NA
127	Otuke	UGA	781	Uganda	0.4568	0.355542	1	NA
128	Oyam	UGA	782	Uganda	0.6296	0.355542	1	NA
129	Pader	UGA	783	Uganda	0.4883	0.355542	1	NA
130	Rubirizi	UGA	784	Uganda	0.1584	0.260009	3	9.92331386104627
131	Sironko	UGA	785	Uganda	0.3171	0.470204	3	10.6677867127587
132	Soroti	UGA	786	Uganda	0.4298	0.470204	2	18.0566340651056
133	Zombo	UGA	787	Uganda	0.4177	0.425836	2	18.3340734011168
134	Bukedea	UGA	788	Uganda	0.4151	0.470204	2	16.9010143418581
135	Dokolo	UGA	789	Uganda	0.4987	0.355542	1	NA
136	Agago	UGA	790	Uganda	0.3849	0.355542	2	18.3030734952322
137	Adamaoua	CMR	815	Cameroon	0.2905	0.33525	2	12.8716582277354
138	Centre	CMR	816	Cameroon	0.2251	0.310219	3	10.5851803473708
139	Est	CMR	817	Cameroon	0.3792	0.376068	2	17.1043551814766
140	Extr�me - Nord	CMR	818	Cameroon	0.206	0.447909	3	6.62665780338395
141	Littoral	CMR	819	Cameroon	0.177	0.417402	3	6.18615378008083
142	Nord	CMR	820	Cameroon	0.1979	0.423439	3	6.77646717333389
143	Nord - Ouest	CMR	821	Cameroon	0.2323	0.308843	3	10.9724276188399
144	Ouest	CMR	822	Cameroon	0.2051	0.297307	3	10.1594892918656
145	Sud	CMR	823	Cameroon	0.333	0.335592	2	15.4162569652736
146	Sud - Ouest	CMR	824	Cameroon	0.344	0.399227	2	13.9438733519201
147	Alebtong	UGA	852	Uganda	0.5101	0.355542	1	NA
148	Bamingui-bangora	CAF	853	Central African Republic	0.2293	0.506062	3	6.6031351198369
149	Basse Kotto	CAF	854	Central African Republic	0.5832	0.441381	1	NA
150	Haut-mboumou	CAF	855	Central African Republic	0.4663	0.492922	1	NA
151	Hautte-kotto	CAF	856	Central African Republic	0.3123	0.433082	3	11.1749376387708
152	Kemo	CAF	857	Central African Republic	0.4826	0.439697	1	NA
153	Lobaye	CAF	858	Central African Republic	0.5579	0.414681	1	NA
154	Mambere-kadei	CAF	859	Central African Republic	0.2962	0.431182	3	10.4311202826034
155	Mbomou	CAF	860	Central African Republic	0.475	0.449545	1	NA
156	Nana Grebizi	CAF	861	Central African Republic	0.3133	0.383794	2	12.5570776476796
157	Nana Mambere	CAF	862	Central African Republic	0.266	0.400738	3	9.74721724287679
158	Ombella-mpoko	CAF	863	Central African Republic	0.6466	0.441003	1	NA
159	Ouaka	CAF	864	Central African Republic	0.4822	0.417848	1	NA
160	Ouham	CAF	865	Central African Republic	0.2492	0.45946	3	7.95891760449642
161	Ouham-pende	CAF	866	Central African Republic	0.2042	0.419792	3	7.06365975738134
162	Sangha Mbaere	CAF	867	Central African Republic	0.3864	0.44218	2	15.5401737854157
163	Vakaga	CAF	868	Central African Republic	0.1805	0.434255	4	5.99951122575004
164	Biltine	TCD	870	Chad	0.0456	0.38773	4	3.80122473371194
165	Guera	TCD	873	Chad	0.1088	0.509161	4	2.99328039650466
166	Lac	TCD	875	Chad	0.1074	0.179116	2	13.6570629753586
167	Logone Occidental	TCD	876	Chad	0.1097	0.493761	4	3.13026244291604
168	Salamat	TCD	881	Chad	0.1669	0.509161	4	4.65057706821427
169	Anjouan	COM	967	NA	NA	NA	NA	NA
170	Moheli	COM	968	NA	NA	NA	NA	NA
171	Ngazidja	COM	969	NA	NA	NA	NA	NA
172	Bouenza	COG	970	Congo	0.1631	0.415857	4	5.73589196081754
173	Cuvette	COG	971	Congo	0.2078	0.542633	4	5.49124312498199
174	Cuvette Ovest	COG	972	Congo	0.2314	0.50242	3	6.72142034841273
175	Kouilou	COG	973	Congo	0.1563	0.368574	3	6.34234712821324
176	Lekoumou	COG	974	Congo	0.2147	0.379847	3	8.30861911005054
177	Likouala	COG	975	Congo	0.4563	0.527345	2	18.9471844661961
178	Niari	COG	976	Congo	0.2359	0.415857	3	8.333293910234
179	Plateaux	COG	977	Congo	0.1833	0.505742	4	5.14403098404487
180	Pool	COG	978	Congo	0.1545	0.436533	4	5.14294767504219
181	Sangha	COG	979	Congo	0.2718	0.509027	3	8.01972260465727
182	Bas Sassandra	CIV	1040	C�te d'Ivoire	0.5479	0.395742	1	NA
183	Denguele	CIV	1041	C�te d'Ivoire	0.5662	0.431474	1	NA
184	Savanes	CIV	1048	C�te d'Ivoire	0.547	0.456641	1	NA
185	Vallee Du Bandama	CIV	1051	C�te d'Ivoire	0.6287	0.44815	1	NA
186	Zanzan	CIV	1053	C�te d'Ivoire	0.5003	0.448259	1	NA
187	Arua	UGA	1057	Uganda	0.4455	0.425836	1	NA
188	Bandundu	COD	1066	Democratic Republic of the Congo	0.391	0.384271	2	17.6404168330141
189	Bas-Congo	COD	1067	Democratic Republic of the Congo	0.4748	0.288937	1	NA
190	Equateur	COD	1068	Democratic Republic of the Congo	0.6718	0.433118	1	NA
191	Kasai-Occidental	COD	1069	Democratic Republic of the Congo	0.5918	0.440064	1	NA
192	Kasai-Oriental	COD	1070	Democratic Republic of the Congo	0.4873	0.447741	1	NA
193	Katanga	COD	1071	Democratic Republic of the Congo	0.4904	0.344215	1	NA
194	Kinshasa	COD	1072	Democratic Republic of the Congo	0.2161	0.319983	3	9.88094806122887
195	Maniema	COD	1073	Democratic Republic of the Congo	0.4598	0.341851	1	NA
196	Nord-Kivu	COD	1074	Democratic Republic of the Congo	0.1686	0.341851	3	7.35587610547851
197	Province Orientale	COD	1075	Democratic Republic of the Congo	0.7139	0.413854	1	NA
198	Sud-Kivu	COD	1076	Democratic Republic of the Congo	0.1431	0.341851	3	6.41120424529567
199	Bududa	UGA	1080	Uganda	0.3176	0.470204	3	10.7054643837684
200	Buvuma	UGA	1082	Uganda	0.5107	0.418572	1	NA
201	Gomba	UGA	1086	Uganda	0.4495	0.398838	1	NA
202	Gulu	UGA	1089	Uganda	0.5512	0.355542	1	NA
203	Ali Sabieh	DJI	1093	Djibouti	4e-04	0.224339	3	9.69331622826234
204	Dikhil	DJI	1094	Djibouti	2e-04	0.224339	3	9.69331622826234
205	Djibouti	DJI	1095	Djibouti	1e-04	0.198	3	11.6112842023271
206	Obock	DJI	1096	Djibouti	0.0102	0.224339	3	9.69331622826234
207	Tadjourah	DJI	1097	Djibouti	0.0044	0.224339	3	9.69331622826234
208	Al Bahr/al Ahmar (redsea)	EGY	1158	NA	NA	NA	NA	NA
209	Al Buhayrah (behera)	EGY	1159	NA	NA	NA	NA	NA
210	Al Daqahliyah (dakahlia)	EGY	1160	NA	NA	NA	NA	NA
211	Al Fayyum (fayoum)	EGY	1161	NA	NA	NA	NA	NA
212	Al Gharbiyah (gharbia)	EGY	1162	NA	NA	NA	NA	NA
213	Al Iskandariyah (alex.)	EGY	1163	NA	NA	NA	NA	NA
214	Al Jizah (giza)	EGY	1164	NA	NA	NA	NA	NA
215	Al Minufiyah (menoufia)	EGY	1165	NA	NA	NA	NA	NA
216	Al Minya (menia)	EGY	1166	NA	NA	NA	NA	NA
217	Al Qahirah (cairo)	EGY	1167	NA	NA	NA	NA	NA
218	Al Qalyubiyah (kalyoubia)	EGY	1168	NA	NA	NA	NA	NA
219	Al Wadi/al Jadid	EGY	1169	NA	NA	NA	NA	NA
220	As Ismailiyah (ismailia)	EGY	1170	NA	NA	NA	NA	NA
221	As Suways (suez)	EGY	1171	NA	NA	NA	NA	NA
222	Ash Sharqiyah (sharkia)	EGY	1172	NA	NA	NA	NA	NA
223	Aswan	EGY	1173	NA	NA	NA	NA	NA
224	Asyiut	EGY	1174	NA	NA	NA	NA	NA
225	Beni Suwayf (beni-suef)	EGY	1175	NA	NA	NA	NA	NA
226	Bur Said (port Said)	EGY	1176	NA	NA	NA	NA	NA
227	Dumyat (damietta)	EGY	1177	NA	NA	NA	NA	NA
228	Janub Sina (south Sinai)	EGY	1178	NA	NA	NA	NA	NA
229	Kafr-el-sheikh	EGY	1179	NA	NA	NA	NA	NA
230	Matruh	EGY	1180	NA	NA	NA	NA	NA
231	Qina	EGY	1181	NA	NA	NA	NA	NA
232	Shamal Sina (north Sinai)	EGY	1182	NA	NA	NA	NA	NA
233	Suhaj	EGY	1183	NA	NA	NA	NA	NA
234	Annobon	GNQ	1198	Equatorial Guinea	NA	NA	NA	NA
235	Bioko Norte	GNQ	1199	Equatorial Guinea	0.15	0.32911	3	6.92519179948588
236	Bioko Sur	GNQ	1200	Equatorial Guinea	0.1271	0.31272	3	6.55468516256409
237	Centro Sur	GNQ	1201	Equatorial Guinea	0.2992	0.405955	3	11.1753620315461
238	Kientem	GNQ	1202	Equatorial Guinea	0.2693	0.490547	3	8.19339498546918
239	Litoral	GNQ	1203	Equatorial Guinea	0.2107	0.488919	3	6.19636657479262
240	Welenzas	GNQ	1204	Equatorial Guinea	0.3485	0.475305	2	12.2867936037341
241	Anseba	ERI	1205	Eritrea	0.0085	0.288937	3	6.13080116123212
242	Archipelagos	ERI	1206	Eritrea	0.0234	NA	NA	NA
243	Debub	ERI	1207	Eritrea	0.0145	0.384271	4	3.86829164895628
244	Debubawi Keih Bahri	ERI	1208	Eritrea	0.0219	0.431474	4	3.13470193127306
245	Gash Barka	ERI	1209	Eritrea	0.0177	0.448259	4	2.94736167986333
246	Maekel	ERI	1210	Eritrea	0.0096	0.384061	4	3.86829164895628
247	Semenawi Keih Bahri	ERI	1211	Eritrea	0.015	0.288937	3	6.13080116123212
248	Addis Ababa	ETH	1227	Ethiopia	2e-04	0.219443	3	10.0080791485836
249	Afar	ETH	1228	Ethiopia	0.005	0.256149	3	7.68840993682328
250	Amhara	ETH	1229	Ethiopia	0.0029	0.0827686	1	NA
251	Benishangul Gumuz	ETH	1230	Ethiopia	0.0084	0.352414	4	4.47777265819675
252	Dire Dawa	ETH	1231	Ethiopia	0.0042	0.309607	4	5.42772265303322
253	Gambella	ETH	1232	Ethiopia	0.01	0.473472	4	2.73168827749435
254	Harari	ETH	1233	Ethiopia	0.0047	0.261819	3	7.38833780973542
255	Kiboga	UGA	1234	Uganda	0.4587	0.418572	1	NA
256	Kibuku	UGA	1235	Uganda	0.6445	0.470204	1	NA
257	SNNP	ETH	1236	Ethiopia	0.0048	0.147943	2	16.0612588721031
258	Tigray	ETH	1237	Ethiopia	0.0035	0.0900476	1	NA
259	Kiryandongo	UGA	1241	Uganda	0.5192	0.380436	1	NA
260	Kumi	UGA	1261	Uganda	0.4446	0.470204	2	19.2656775496306
261	Estuaire	GAB	1275	Gabon	0.13	0.40518	4	4.75651482265831
262	Haut-Ogooue	GAB	1276	Gabon	0.0936	0.403848	4	3.60874880163939
263	Moyen-Ogooue	GAB	1277	Gabon	0.1026	0.411569	4	3.77871348964419
264	Ngounie	GAB	1278	Gabon	0.1241	0.390037	4	4.83023584863497
265	Nyanga	GAB	1279	Gabon	0.1269	0.390037	4	4.92528128359592
266	Ogooue-Ivindo	GAB	1280	Gabon	0.0964	0.395302	4	3.84049705162312
267	Ogooue-lolo	GAB	1281	Gabon	0.0998	0.403848	4	3.80744607504565
268	Ogooue-Maritime	GAB	1282	Gabon	0.0753	0.411569	4	3.40485102312812
269	Woleu-Ntem	GAB	1283	Gabon	0.1441	0.395302	4	5.41574964936357
270	Banjul	GMB	1284	Gambia	0.0291	0.237924	3	8.76403245792654
271	Central River	GMB	1285	Gambia	0.0191	0.324995	4	5.02909195484106
272	Kombo Saint Mary	GMB	1286	Gambia	0.0205	0.237924	3	8.76403245792654
273	Lower River	GMB	1287	Gambia	0.0174	0.324995	4	5.02909195484106
274	North Bank	GMB	1288	Gambia	0.0148	0.304746	4	5.57583802866632
275	Upper River	GMB	1289	Gambia	0.0219	0.318312	4	5.1988976229402
276	Western	GMB	1290	Gambia	0.0271	0.251765	3	7.94410935324166
277	Rafah	XXX	1295	NA	NA	NA	NA	NA
278	Ashanti	GHA	1324	Ghana	0.3713	0.378957	2	16.4644512455875
279	Brong Ahafo	GHA	1325	Ghana	0.5519	0.378957	1	NA
280	Central	GHA	1326	Ghana	0.4853	0.378997	1	NA
281	Eastern	GHA	1327	Ghana	0.417	0.370958	1	NA
282	Greater Accra	GHA	1328	Ghana	0.0904	0.342309	4	4.66842384100236
283	Northern	GHA	1329	Ghana	0.6995	0.493651	1	NA
284	Upper East	GHA	1330	Ghana	0.7836	0.532832	1	NA
285	Upper West	GHA	1331	Ghana	0.8088	0.514884	1	NA
286	Volta	GHA	1332	Ghana	0.3718	0.429403	2	14.8668144308913
287	Western	GHA	1333	Ghana	0.4963	0.425332	1	NA
288	Kyankwanzi	UGA	1344	Uganda	0.508	0.418572	1	NA
289	Mitooma	UGA	1360	Uganda	0.1177	0.260009	3	8.3931334373006
290	Kyegegwa	UGA	1361	Uganda	0.4806	0.380436	1	NA
291	Kyenjojo	UGA	1362	Uganda	0.3298	0.380436	2	13.6459895368436
292	Mpigi	UGA	1363	Uganda	0.2159	0.398838	3	7.90467433521608
293	Nwoya	UGA	1364	Uganda	0.5098	0.355542	1	NA
294	Serere	UGA	1365	Uganda	0.4876	0.470204	1	NA
295	Lwengo	UGA	1366	Uganda	0.3935	0.398838	2	17.3542922733786
296	Mukono	UGA	1367	Uganda	0.296	0.418572	3	10.6922476122014
297	Namayingo	UGA	1368	Uganda	0.6159	NA	NA	NA
298	Pallisa	UGA	1369	Uganda	0.5657	0.470204	1	NA
299	Lira	UGA	1370	Uganda	0.5791	0.355542	1	NA
300	Rakai	UGA	1371	Uganda	0.363	0.398838	2	15.2115661356228
301	Lyantonde	UGA	1372	Uganda	0.3491	0.398838	2	14.2768160365879
302	Kaolack	SEN	1373	Senegal	0.0586	0.299054	4	5.75184569943109
303	Kedougou	SEN	1374	Senegal	0.2075	0.407139	3	7.43481131303307
304	Kolda	SEN	1375	Senegal	0.1035	0.321187	4	5.53921218959784
305	Sedhiou	SEN	1376	Senegal	0.0584	0.321187	4	5.12425355282837
306	Tambacounda	SEN	1377	Senegal	0.1435	0.407139	4	5.18951895524425
307	Kaffrine	SEN	1378	Senegal	0.0824	0.299054	4	5.75184569943109
308	Bafata	GNB	1385	Guinea-Bissau	0.0679	0.337427	4	4.76847660541367
309	Biombo	GNB	1386	Guinea-Bissau	0.0532	0.307978	4	5.47103356627485
310	Bolama/bijagos	GNB	1387	Guinea-Bissau	0.0139	NA	NA	NA
311	Cacheu	GNB	1388	Guinea-Bissau	0.0365	0.307978	4	5.47103356627485
312	Gabu	GNB	1389	Guinea-Bissau	0.1479	0.337427	3	6.66208547689538
313	Oio	GNB	1390	Guinea-Bissau	0.0524	0.307978	4	5.47103356627485
314	Quinara	GNB	1391	Guinea-Bissau	0.0547	0.347859	4	4.56236575518496
315	Sector Autonomo De Bissau	GNB	1392	Guinea-Bissau	0.0388	NA	NA	NA
316	Tombali	GNB	1393	Guinea-Bissau	0.0609	0.347859	4	4.56236575518496
317	Southern District	ISR	1614	NA	NA	NA	NA	NA
318	Berea	LSO	1803	NA	NA	NA	NA	NA
319	Butha Buthe	LSO	1804	NA	NA	NA	NA	NA
320	Leribe	LSO	1805	NA	NA	NA	NA	NA
321	Mafeteng	LSO	1806	NA	NA	NA	NA	NA
322	Maseru	LSO	1807	NA	NA	NA	NA	NA
323	Mohale's Hoek	LSO	1808	NA	NA	NA	NA	NA
324	Mokhotlong	LSO	1809	NA	NA	NA	NA	NA
325	Qacha's Nek	LSO	1810	NA	NA	NA	NA	NA
326	Quthing	LSO	1811	NA	NA	NA	NA	NA
327	Thaba Tseka	LSO	1812	NA	NA	NA	NA	NA
328	Bomi	LBR	1814	Liberia	0.2353	0.458448	3	7.52104308932758
329	Bong	LBR	1815	Liberia	0.3824	0.413016	2	16.0838098327108
330	Gbarpolu	LBR	1816	Liberia	0.3406	0.461396	2	12.1309019966743
331	Grand Bassa	LBR	1817	Liberia	0.2965	0.411387	3	10.8956843478392
332	Grand Cape Mount	LBR	1818	Liberia	0.3111	0.439603	3	10.991225115404
333	Grand Gedeh	LBR	1819	Liberia	0.3892	0.463339	2	15.2054400238351
334	Grand Kru	LBR	1820	Liberia	0.45	0.434978	1	NA
335	Lofa	LBR	1821	Liberia	0.3739	0.42499	2	15.1353930159603
336	Margibi	LBR	1822	Liberia	0.1975	0.426933	3	6.68995050023783
337	Maryland	LBR	1823	Liberia	0.4248	0.40484	2	19.565390852443
338	Montserrado	LBR	1824	Liberia	0.127	0.414674	4	4.51341590713622
339	Nimba	LBR	1825	Liberia	0.4358	0.419017	2	19.9750261099934
340	Rivercess	LBR	1826	Liberia	0.3031	0.431215	3	10.7380972045077
341	River Ghee	LBR	1827	Liberia	0.4253	0.444006	2	18.4225485765258
342	Sinoe	LBR	1828	Liberia	0.385	0.45406	2	15.1414501386422
343	Ajdabiya (agedabia)	LBY	1829	NA	NA	NA	NA	NA
344	Al Aziziyah	LBY	1830	NA	NA	NA	NA	NA
345	Al Fatah	LBY	1831	NA	NA	NA	NA	NA
346	Al Jabal Al Akhdar	LBY	1832	NA	NA	NA	NA	NA
347	Al Jufrah	LBY	1833	NA	NA	NA	NA	NA
348	Al Khoms	LBY	1834	NA	NA	NA	NA	NA
349	Al Kufrah	LBY	1835	NA	NA	NA	NA	NA
350	Ash Shati	LBY	1836	NA	NA	NA	NA	NA
351	Awbari (ubari)	LBY	1837	NA	NA	NA	NA	NA
352	Az Zawia (azzawiya)	LBY	1838	NA	NA	NA	NA	NA
353	Banghazi	LBY	1839	NA	NA	NA	NA	NA
354	Darnah	LBY	1840	NA	NA	NA	NA	NA
355	Ghadamis	LBY	1841	NA	NA	NA	NA	NA
356	Gharyan	LBY	1842	NA	NA	NA	NA	NA
357	Misurata	LBY	1843	NA	NA	NA	NA	NA
358	Murzuq	LBY	1844	NA	NA	NA	NA	NA
359	Nuqat Al Khams	LBY	1845	NA	NA	NA	NA	NA
360	Sabha	LBY	1846	NA	NA	NA	NA	NA
361	Sawfajjin (sofuljeen)	LBY	1847	NA	NA	NA	NA	NA
362	Surt (sirte)	LBY	1848	NA	NA	NA	NA	NA
363	Tarhunah	LBY	1849	NA	NA	NA	NA	NA
364	Tripoli (tarabulus)	LBY	1850	NA	NA	NA	NA	NA
365	Tubruq (tobruk)	LBY	1851	NA	NA	NA	NA	NA
366	Yafran (yefren)	LBY	1852	NA	NA	NA	NA	NA
367	Zeleitin (zliten)	LBY	1853	NA	NA	NA	NA	NA
368	Central Region	MWI	1888	Malawi	0.4194	0.24581	1	NA
369	Northern Region	MWI	1889	Malawi	0.1666	0.34911	3	7.11618996643939
370	Southern Region	MWI	1890	Malawi	0.3515	0.293193	2	18.7976186299868
371	Bamako	MLI	1926	Mali	0.0514	0.442222	4	3.00938296508671
372	Gao	MLI	1927	Mali	0.1598	0.35229	3	6.79057790194674
373	Kayes	MLI	1928	Mali	0.2341	0.379492	3	9.07242590272015
374	Kidal	MLI	1929	Mali	0.0245	0.279426	3	6.52889285728344
375	Koulikoro	MLI	1930	Mali	0.2489	0.408068	3	8.95614545559962
376	Mopti	MLI	1931	Mali	0.4399	0.410997	1	NA
377	Segou	MLI	1932	Mali	0.4274	0.41527	2	19.4501670692943
378	Sikasso	MLI	1933	Mali	0.5157	0.455053	1	NA
379	Tombouctou	MLI	1934	Mali	0.1848	0.239011	2	12.2301515758239
380	Adrar	MRT	2004	Mauritania	0	NA	NA	NA
381	Assaba	MRT	2005	Mauritania	0.0388	0.300856	4	5.70240975585053
382	Brakna	MRT	2006	Mauritania	0.0397	0.297098	4	5.81950585138533
383	Dakhlet Nouadhibou	MRT	2007	Mauritania	0	NA	NA	NA
384	Gorgol	MRT	2008	Mauritania	0.0242	0.334359	4	4.83061945387472
385	Guidimaka	MRT	2009	Mauritania	0.0344	0.356484	4	4.40356773791986
386	Hodh Ech Chargui	MRT	2010	Mauritania	0.0643	0.311346	4	5.38533438768547
387	Hodh El Gharbi	MRT	2011	Mauritania	0.0525	0.34558	4	4.60052992033875
388	Inchiri	MRT	2012	Mauritania	0	NA	NA	NA
389	Nouakchott	MRT	2013	Mauritania	0.0194	0.167594	2	14.1626167033181
390	Tagant	MRT	2014	Mauritania	0.0349	0.300856	4	5.70240975585053
391	Tiris Zemmour	MRT	2015	Mauritania	0	NA	NA	NA
392	Trarza	MRT	2016	Mauritania	0.0256	0.23528	3	8.95660160144078
393	Administrative unit not available	MYT	2027	NA	NA	NA	NA	NA
394	Centre	MAR	2105	NA	NA	NA	NA	NA
395	Centre Nord	MAR	2106	NA	NA	NA	NA	NA
396	Centre Sud	MAR	2107	NA	NA	NA	NA	NA
397	Nord Ouest	MAR	2108	NA	NA	NA	NA	NA
398	Oriental	MAR	2109	NA	NA	NA	NA	NA
399	Sud	MAR	2110	NA	NA	NA	NA	NA
400	Tensift	MAR	2111	NA	NA	NA	NA	NA
401	Cabo Delgado	MOZ	2112	Mozambique	0.3857	0.42342	2	16.0220092106913
402	Gaza	MOZ	2113	Mozambique	0.1001	0.286263	3	6.53994002040834
403	Inhambane	MOZ	2114	Mozambique	0.2785	0.293877	2	13.9539344035417
404	Manica	MOZ	2115	Mozambique	0.2948	0.251063	2	17.3277766209162
405	Maputo	MOZ	2116	Mozambique	0.073	0.243785	3	8.42063456350207
406	Maputo (city)	MOZ	2117	Mozambique	0.0668	NA	NA	NA
407	Nampula	MOZ	2118	Mozambique	0.4774	0.383996	1	NA
408	Niassa	MOZ	2119	Mozambique	0.3935	0.34911	2	19.2013299905577
409	Sofala	MOZ	2120	Mozambique	0.303	0.339679	2	13.3905409085514
410	Tete	MOZ	2121	Mozambique	0.3375	0.251063	1	NA
411	Zambezia	MOZ	2122	Mozambique	0.5222	0.35062	1	NA
412	Caprivi	NAM	2137	Namibia	0.0254	0.339851	4	4.7179480574503
413	Erongo	NAM	2138	Namibia	1e-04	NA	NA	NA
414	Hardap	NAM	2139	Namibia	0	0.198	3	11.6112842023271
415	Karas	NAM	2140	Namibia	0	NA	NA	NA
416	Kavango	NAM	2141	Namibia	0.0348	0.370639	4	4.13382978170608
417	Khomas	NAM	2142	Namibia	0	0.171892	2	13.7569899773122
418	Kunene	NAM	2143	Namibia	0.049	0.159323	2	14.9628075576078
419	Ohangwena	NAM	2144	Namibia	0.0553	0.424617	4	3.21626020299181
420	Omaheke	NAM	2145	Namibia	0.0288	0.251065	3	7.97307626511147
421	Omusati	NAM	2146	Namibia	0.0755	0.352921	4	4.46845826393097
422	Oshana	NAM	2147	Namibia	0.0457	0.389284	4	3.77314655096903
423	Oshikoto	NAM	2148	Namibia	0.0552	0.410525	4	3.41990219579688
424	Otjozondjupa	NAM	2149	Namibia	0.0498	0.289771	3	6.09208454382932
425	Agadez	NER	2202	Niger	0.0763	0.197565	3	11.6504115904714
426	Diffa	NER	2203	Niger	0.1549	0.281441	3	8.73919670245842
427	Dosso	NER	2204	Niger	0.3644	0.421283	2	14.6273795990395
428	Maradi	NER	2205	Niger	0.3666	0.34884	2	17.2673077552544
429	Niamey	NER	2206	Niger	0.2295	0.42699	3	7.88110744489099
430	Tahoua	NER	2207	Niger	0.2834	0.342478	2	12.2505378566021
431	Tillaberi	NER	2208	Niger	0.3197	0.389362	2	12.7638173984525
432	Zinder	NER	2209	Niger	0.2288	0.321302	3	10.410906883455
433	Adamawa	NGA	2211	Nigeria	0.2697	0.440827	3	9.01739167868472
434	Akwa Ibom	NGA	2212	Nigeria	0.3302	0.49256	3	10.9800963027513
435	Anambra	NGA	2213	Nigeria	0.1449	0.447218	4	4.6715984314377
436	Benue	NGA	2215	Nigeria	0.4165	0.490761	2	16.5298760798188
437	Borno	NGA	2216	Nigeria	0.2311	0.356218	3	9.52282648642478
438	Cross River	NGA	2217	Nigeria	0.4192	0.492268	2	16.7116558147645
439	Delta	NGA	2218	Nigeria	0.2018	0.43218	3	6.7397878007254
440	Edo	NGA	2219	Nigeria	0.3711	0.397836	2	15.7678936796955
441	FCT, Abuja	NGA	2221	Nigeria	0.2642	0.45934	3	8.47116369493391
442	Imo	NGA	2222	Nigeria	0.3197	0.46841	3	10.8567961893847
443	Jigawa	NGA	2223	Nigeria	0.3021	0.405288	3	11.3318527673694
444	Kaduna	NGA	2224	Nigeria	0.3384	0.389863	2	13.8791002484906
445	Kano	NGA	2225	Nigeria	0.2795	0.387205	3	10.672153463486
446	Katsina	NGA	2226	Nigeria	0.4283	0.366459	1	NA
447	Kebbi	NGA	2227	Nigeria	0.5364	0.455715	1	NA
448	Kogi	NGA	2228	Nigeria	0.3982	0.410376	2	17.2980996135147
449	Kwara	NGA	2229	Nigeria	0.4887	0.396747	1	NA
450	Lagos	NGA	2230	Nigeria	0.0943	0.397876	4	3.73086069282113
451	Niger	NGA	2231	Nigeria	0.4678	0.45472	1	NA
452	Ogun	NGA	2232	Nigeria	0.3449	0.414417	2	13.5478926326395
453	Osun	NGA	2234	Nigeria	0.4667	0.389561	1	NA
454	Oyo	NGA	2235	Nigeria	0.4602	0.396747	1	NA
455	Taraba	NGA	2239	Nigeria	0.3317	0.481301	3	11.2558871312403
456	Yobe	NGA	2240	Nigeria	0.3034	0.351926	2	13.0152270576066
457	Principe	STP	2620	NA	NA	NA	NA	NA
458	Sao Tome	STP	2621	NA	NA	NA	NA	NA
459	Dakar	SEN	2636	Senegal	0.0305	0.172819	2	13.7127100771716
460	Thies	SEN	2644	Senegal	0.0428	0.205266	3	11.072009081774
461	Ziguinchor	SEN	2645	Senegal	0.0738	0.269605	3	6.97705703156743
462	Eastern	SLE	2654	Sierra Leone	0.5871	0.406389	1	NA
463	Northern	SLE	2655	Sierra Leone	0.6159	0.493651	1	NA
464	Southern	SLE	2656	Sierra Leone	0.5405	0.437508	1	NA
465	Western Area	SLE	2657	Sierra Leone	0.2772	NA	NA	NA
466	Awdal	SOM	2688	Somalia	0.0121	0.300157	4	5.71876579892264
467	Bakool	SOM	2689	Somalia	0.0121	0.403419	4	3.52963621279858
468	Bari	SOM	2690	Somalia	0.0202	0.268396	3	7.05185364150503
469	Bay	SOM	2691	Somalia	0.013	0.410351	4	3.41990219579688
470	Banadir	SOM	2692	Somalia	0.0032	0.385302	4	3.84890642629573
471	Galgaduud	SOM	2693	Somalia	0.0188	0.403039	4	3.53777264942586
472	Gedo	SOM	2694	Somalia	0.0118	0.459061	4	2.84879612819335
473	Hiraan	SOM	2695	Somalia	0.0222	0.455736	4	2.87571290566249
474	Juba Hoose	SOM	2696	Somalia	0.0277	0.442008	4	3.01474759888895
475	Shabelle Hoose	SOM	2697	Somalia	0.006	0.394917	4	3.67353892446356
476	Juba Dhexe	SOM	2698	Somalia	0.0205	0.44107	4	3.02556927716421
477	Shabelle Dhexe	SOM	2699	Somalia	0.0081	0.415536	4	3.34616944356987
478	Mudug	SOM	2700	Somalia	0.0174	0.330423	4	4.91640513562395
479	Nugaal	SOM	2701	Somalia	0.0315	0.256899	3	7.66056000231385
480	Sanaag	SOM	2702	Somalia	0.014	0.128025	2	18.2255177344963
481	Sool	SOM	2703	Somalia	0.0247	0.128025	2	18.2255177344963
482	Togdheer	SOM	2704	Somalia	0.0285	0.223345	3	9.76260818753398
483	Woqooyi Galbeed	SOM	2705	Somalia	0.0149	0.151436	2	15.7043060294291
484	Ceuta, Ciudad Autonoma De	ESP	2725	NA	NA	NA	NA	NA
485	Melilla, Ciudad Autonoma De	ESP	2730	NA	NA	NA	NA	NA
486	Al Jazeera	SDN	2745	Sudan	0.0117	0.447178	4	2.95740127117285
487	El Buheyrat	SSD	2746	South Sudan	0.1396	0.476052	4	4.19516609388048
488	Unity	SSD	2747	South Sudan	0.0672	0.516144	4	2.48842342035781
489	Central Equatoria	SSD	2748	South Sudan	0.3737	0.502464	2	13.3098630898763
490	Blue Nile	SDN	2749	Sudan	0.0595	0.447178	4	2.95740127117285
491	Eastern Equatoria	SSD	2750	South Sudan	0.2012	0.502464	4	5.73376496091915
492	Jonglei	SSD	2751	South Sudan	0.0976	0.516144	4	2.66709739052357
493	Khartoum	SDN	2753	Sudan	0.0046	0.346703	4	4.5813965847209
494	Northern Bahr El Ghazal	SSD	2754	South Sudan	0.0711	0.476052	4	2.71353239348926
495	Northern	SDN	2755	Sudan	0.0043	0.25515	3	7.74444847597628
496	Northern Darfur	SDN	2757	Sudan	0.0133	0.340859	4	4.69802512445934
497	Nile	SDN	2761	Sudan	0.0078	0.25515	3	7.74444847597628
498	Sennar	SDN	2762	Sudan	0.0152	0.447178	4	2.95740127117285
499	Southern Darfur	SDN	2764	Sudan	0.0223	0.340859	4	4.69802512445934
500	Warab	SSD	2765	South Sudan	0.0907	0.476052	4	2.71353239348926
501	Western Bahr El Ghazal	SSD	2766	South Sudan	0.1497	0.476052	4	4.50018597047213
502	Western Equatoria	SSD	2768	South Sudan	0.3802	0.502464	2	13.7248388067844
503	Western Darfur	SDN	2769	Sudan	0.0348	0.340859	4	4.69802512445934
504	White Nile	SDN	2770	Sudan	0.0137	0.447178	4	2.95740127117285
505	Hhohho	SWZ	2782	Swaziland	4e-04	0.148951	2	15.9585783114319
506	Lubombo	SWZ	2783	Swaziland	0.001	0.20817	3	10.8458732510899
507	Manzini	SWZ	2784	Swaziland	0	NA	NA	NA
508	Shiselweni	SWZ	2785	Swaziland	0	NA	NA	NA
509	Centrale	TGO	2970	Togo	0.6127	0.425255	1	NA
510	Kara	TGO	2971	Togo	0.8108	0.469391	1	NA
511	Maritime	TGO	2972	Togo	0.3123	0.380707	2	12.568451816241
512	Plateaux	TGO	2973	Togo	0.4726	0.521829	1	NA
513	Savanes	TGO	2974	Togo	0.8833	0.388392	1	NA
514	Ariana	TUN	2993	NA	NA	NA	NA	NA
515	Ben Arous	TUN	2994	NA	NA	NA	NA	NA
516	Bizerte	TUN	2995	NA	NA	NA	NA	NA
517	Beja	TUN	2996	NA	NA	NA	NA	NA
518	Gabes	TUN	2997	NA	NA	NA	NA	NA
519	Gafsa	TUN	2998	NA	NA	NA	NA	NA
520	Jendouba	TUN	2999	NA	NA	NA	NA	NA
521	Kairouan	TUN	3000	NA	NA	NA	NA	NA
522	Kasserine	TUN	3001	NA	NA	NA	NA	NA
523	Kebili	TUN	3002	NA	NA	NA	NA	NA
524	Le Kef	TUN	3003	NA	NA	NA	NA	NA
525	Mahdia	TUN	3004	NA	NA	NA	NA	NA
526	Manouba	TUN	3005	NA	NA	NA	NA	NA
527	Monastir	TUN	3006	NA	NA	NA	NA	NA
528	Medenine	TUN	3007	NA	NA	NA	NA	NA
529	Nabeul	TUN	3008	NA	NA	NA	NA	NA
530	Sfax	TUN	3009	NA	NA	NA	NA	NA
531	Sidi Bouz	TUN	3010	NA	NA	NA	NA	NA
532	Siliana	TUN	3011	NA	NA	NA	NA	NA
533	Sousse	TUN	3012	NA	NA	NA	NA	NA
534	Tataouine	TUN	3013	NA	NA	NA	NA	NA
535	Tozeur	TUN	3014	NA	NA	NA	NA	NA
536	Tunis	TUN	3015	NA	NA	NA	NA	NA
537	Zaghouan	TUN	3016	NA	NA	NA	NA	NA
538	Adjumani	UGA	3104	Uganda	0.4234	0.425836	2	18.7810043655641
539	Busia	UGA	3110	Uganda	0.6426	0.4572	1	NA
540	Hoima	UGA	3112	Uganda	0.475	0.380436	1	NA
541	Jinja	UGA	3114	Uganda	0.5543	0.4572	1	NA
542	Kabale	UGA	3115	Uganda	0.004	0.260009	3	7.46879808971433
543	Kalangala	UGA	3117	Uganda	0.1368	0.418572	4	4.7989501338403
544	Kasese	UGA	3121	Uganda	0.141	0.380436	4	5.59035675583243
545	Kibaale	UGA	3123	Uganda	0.4593	0.380436	1	NA
546	Kisoro	UGA	3125	Uganda	0.0052	0.260009	3	7.46879808971433
547	Moyo	UGA	3136	Uganda	0.4029	0.425836	2	17.1945197182021
548	Ntungamo	UGA	3141	Uganda	0.0869	0.260009	3	7.46879808971433
549	Ssembabule	UGA	3145	Uganda	0.4926	0.398838	1	NA
550	Rio De Oro	ESH	3405	NA	NA	NA	NA	NA
551	Saguia El Hamra	ESH	3406	NA	NA	NA	NA	NA
552	Central	ZMB	3426	Zambia	0.0995	0.176387	2	13.6232248081933
553	Copperbelt	ZMB	3427	Zambia	0.0814	0.285798	3	6.25049202280609
554	Eastern	ZMB	3428	Zambia	0.1867	0.294285	3	9.47499716863654
555	Luapula	ZMB	3429	Zambia	0.4047	0.348831	1	NA
556	Lusaka	ZMB	3430	Zambia	0.0256	0.204785	3	11.1099933481155
557	North-Western	ZMB	3431	Zambia	0.1198	0.311108	3	6.3541098801558
558	Northern	ZMB	3432	Zambia	0.1446	0.248939	3	9.99388197158257
559	Southern	ZMB	3433	Zambia	0.0554	0.183405	2	12.7772120445896
560	Western	ZMB	3434	Zambia	0.0592	0.319109	4	5.17368793933121
561	Bulawayo	ZWE	3435	Zimbabwe	0.0118	0.190859	2	12.2064128915639
562	Harare	ZWE	3436	Zimbabwe	0.0103	0.188528	2	12.3680227174557
563	Manicaland	ZWE	3437	Zimbabwe	0.0344	0.0930457	1	NA
564	Mashonaland Central	ZWE	3438	Zimbabwe	0.0185	0.144559	2	16.4249467860351
565	Mashonaland West	ZWE	3440	Zimbabwe	0.0262	0.163519	2	14.533729732777
566	Masvingo	ZWE	3441	Zimbabwe	0.0229	0.151525	2	15.7043060294291
567	Matabeleland South	ZWE	3443	Zimbabwe	0.0127	0.120465	2	19.0879070995776
568	Midlands	ZWE	3444	Zimbabwe	0.0253	0.164394	2	14.4400336330176
569	Southern Kordofan	SDN	4150	Sudan	0.017	0.390642	4	3.74546240108232
570	Batha Est	TCD	12904	Chad	0.0916	0.509161	4	2.53795378476647
571	Batha Ouest	TCD	12905	Chad	0.0806	0.509161	4	2.52028853271636
572	Borkou	TCD	12907	Chad	0.0043	0.179116	2	13.1517600114989
573	Ennedi	TCD	12908	Chad	0.0154	0.179116	2	13.1517600114989
574	Tibesti	TCD	12909	Chad	4e-04	0.179116	2	13.1517600114989
575	Baguirmi	TCD	12910	Chad	0.1008	0.481453	4	2.95086519072495
576	Daraba	TCD	12911	Chad	0.1029	0.481453	4	3.01233371558399
577	Hadjer Lamis	TCD	12912	Chad	0.0937	0.447909	4	3.03467254440505
578	Barl El Gazal	TCD	12914	Chad	0.0801	0.179116	2	13.1517600114989
579	Kanem	TCD	12915	Chad	0.0741	0.179116	2	13.1517600114989
580	Logone Oriental	TCD	12918	Chad	0.1217	0.493761	4	3.490375262038
581	Mont De Lam	TCD	12919	Chad	0.2006	0.493761	4	5.81470519061372
582	Kabia	TCD	12920	Chad	0.1693	0.477541	4	5.07627897628824
583	Mayo-Boneye	TCD	12921	Chad	0.124	0.477541	4	3.69223786609116
584	Mayo-Dala	TCD	12922	Chad	0.1724	0.477541	4	5.16053310526839
585	Barh Koh	TCD	12923	Chad	0.1292	0.514434	4	3.54874186731598
586	Lac Iro	TCD	12924	Chad	0.1722	0.514434	4	4.75375104213983
587	Mandoul	TCD	12925	Chad	0.1217	0.514434	4	3.34409609524738
588	Assongha	TCD	12926	Chad	0.0675	0.38773	4	3.80122473371194
589	Ouaddai	TCD	12927	Chad	0.0994	0.38773	4	4.06588063473286
590	Sila	TCD	12928	Chad	0.1535	0.38773	4	5.87820433999571
591	Tandjile Est	TCD	12930	Chad	0.06	0.493761	4	2.59834455070763
592	Tandjile Ouest	TCD	12931	Chad	0.0937	0.493761	4	2.67254139095012
593	Comoe	CIV	16837	C�te d'Ivoire	0.5781	0.384061	1	NA
594	District Autonome de Yamoussoukro	CIV	16838	C�te d'Ivoire	0.3842	0.384061	2	17.1742834534127
595	District autonome de yamoussoukro	CIV	16839	C�te d'Ivoire	0.629	0.425795	1	NA
596	G�h-Djiboua	CIV	16840	C�te d'Ivoire	0.5748	0.384061	1	NA
597	Lacs	CIV	16841	C�te d'Ivoire	0.6261	0.425795	1	NA
598	Lagunes	CIV	16842	C�te d'Ivoire	0.5913	0.384061	1	NA
599	Montagnes	CIV	16843	C�te d'Ivoire	0.5314	0.376557	1	NA
600	Sassandra-Marahoue	CIV	16844	C�te d'Ivoire	0.591	0.393769	1	NA
601	Woroba	CIV	16845	C�te d'Ivoire	0.5414	0.431474	1	NA
602	East/Iburasirazuba	RWA	21969	Rwanda	0.0425	0.317862	4	5.21162922401912
603	Kigali City/Umujyi wa Kigali	RWA	21970	Rwanda	0.0126	0.331436	4	4.89462000465342
604	North/Amajyaruguru	RWA	21971	Rwanda	0.0115	0.317862	4	5.21162922401912
605	South/Amajyepfo	RWA	21972	Rwanda	0.0256	0.257155	3	7.63282333938792
606	West/Iburengerazuba	RWA	21973	Rwanda	0.0137	0.157566	2	15.1085029293087
607	Upper Nile	SSD	37021	South Sudan	0.0619	0.516144	4	2.48842342035781
608	Boucle Du Mouhoun	BFA	40276	Burkina Faso	0.7862	0.512208	1	NA
609	Cascades	BFA	40277	Burkina Faso	0.6201	0.49566	1	NA
610	Centre	BFA	40278	Burkina Faso	0.3092	0.479632	3	10.1045597634592
611	Centre-est	BFA	40279	Burkina Faso	0.7024	0.508988	1	NA
612	Centre-nord	BFA	40280	Burkina Faso	0.7181	0.495004	1	NA
613	Centre-ouest	BFA	40281	Burkina Faso	0.7718	0.517015	1	NA
614	Centre-sud	BFA	40282	Burkina Faso	0.7061	0.510622	1	NA
615	Est	BFA	40283	Burkina Faso	0.7377	0.490893	1	NA
616	Hauts-bassins	BFA	40284	Burkina Faso	0.5966	0.478686	1	NA
617	Nord	BFA	40285	Burkina Faso	0.6557	0.502293	1	NA
618	Plateau Central	BFA	40286	Burkina Faso	0.6375	0.514228	1	NA
619	Sahel	BFA	40287	Burkina Faso	0.7633	0.461836	1	NA
620	Sud-ouest	BFA	40288	Burkina Faso	0.8291	0.510915	1	NA
621	Bubanza	BDI	40542	Burundi	0.0914	0.393596	4	3.71312797552797
622	Bujumbura-Mairie	BDI	40543	Burundi	0.0727	0.254236	3	7.80093666761426
623	Bujumbura-Rural	BDI	40544	Burundi	0.0668	0.254236	3	7.80093666761426
624	Bururi	BDI	40545	Burundi	0.0717	0.201275	3	11.3782055115262
625	Cankuzo	BDI	40546	Burundi	0.4127	0.312664	1	NA
626	Cibitoke	BDI	40547	Burundi	0.097	0.269873	3	7.191208502865
627	Gitega	BDI	40548	Burundi	0.1201	0.235428	3	9.89131572755976
628	Karuzi	BDI	40549	Burundi	0.2405	0.283019	2	12.4755254194871
629	Kayanza	BDI	40550	Burundi	0.0945	0.304621	4	5.69274635039472
630	Kirundo	BDI	40551	Burundi	0.1927	0.348363	3	8.15397847830029
631	Makamba	BDI	40552	Burundi	0.1763	0.29992	3	8.84973962720199
632	Muramvya	BDI	40553	Burundi	0.0601	0.270359	3	6.95236586989542
633	Muyinga	BDI	40554	Burundi	0.2827	0.314123	2	13.2656841762247
634	Mwaro	BDI	40555	Burundi	0.0477	0.214898	3	10.3303018595951
635	Ngozi	BDI	40556	Burundi	0.1871	0.3046	3	9.11048304658365
636	Rutana	BDI	40557	Burundi	0.2051	0.274263	3	11.2178425847446
637	Ruyigi	BDI	40558	Burundi	0.2985	0.307095	2	14.4414810829176
638	Boke	GIN	40700	Guinea	0.3008	0.384048	3	11.8537116191336
639	Conakry	GIN	40701	Guinea	0.1277	0.433187	4	4.28068701167908
640	Faranah	GIN	40702	Guinea	0.5439	0.336077	1	NA
641	Kankan	GIN	40703	Guinea	0.4889	0.398412	1	NA
642	Kindia	GIN	40704	Guinea	0.4558	0.380854	1	NA
643	Labe	GIN	40705	Guinea	0.3339	0.279961	2	18.1545849703319
644	Mamou	GIN	40706	Guinea	0.3871	0.275093	1	NA
645	N'Zerekore	GIN	40707	Guinea	0.6109	0.339739	1	NA
646	Red Sea	SDN	40772	Sudan	0.0107	0.368735	4	4.17167593882654
647	Administrative unit not available	SDN	40776	Sudan	1e-04	0.368735	4	4.17167593882654
648	Administrative unit not available	SDN	40777	Sudan	0.0011	NA	NA	NA
649	Alaotra Mangoro	MDG	41750	Madagascar	0.0638	0.198	3	11.6112842023271
650	Amoron'i Mania	MDG	41751	Madagascar	0.0298	0.198	3	11.6112842023271
651	Analamanga	MDG	41752	Madagascar	0.0324	0.198	3	11.6112842023271
652	Analanjirofo	MDG	41753	Madagascar	0.0846	0.198	3	11.6112842023271
653	Androy	MDG	41754	Madagascar	0.0301	0.198	3	11.6112842023271
654	Anosy	MDG	41755	Madagascar	0.0516	0.198	3	11.6112842023271
655	Atsimo Andrefana	MDG	41756	Madagascar	0.0237	0.198	3	11.6112842023271
656	Atsimo Atsinanana	MDG	41757	Madagascar	0.1285	0.198	2	12.8216493249169
657	Atsinanana	MDG	41758	Madagascar	0.1546	0.198	2	13.7860485529366
658	Betsiboka	MDG	41759	Madagascar	0.0703	0.198	3	11.6112842023271
659	Boeny	MDG	41760	Madagascar	0.0598	0.198	3	11.6112842023271
660	Bongolava	MDG	41761	Madagascar	0.0335	0.198	3	11.6112842023271
661	Diana	MDG	41762	Madagascar	0.0391	0.198	3	11.6112842023271
662	Haute Matsiatra	MDG	41763	Madagascar	0.0295	0.198	3	11.6112842023271
663	Ihorombe	MDG	41764	Madagascar	0.0402	0.198	3	11.6112842023271
664	Itasy	MDG	41765	Madagascar	0.0267	0.198	3	11.6112842023271
665	Melaky	MDG	41766	Madagascar	0.0577	0.198	3	11.6112842023271
666	Menabe	MDG	41767	Madagascar	0.0411	0.198	3	11.6112842023271
667	Sava	MDG	41768	Madagascar	0.0751	0.198	3	11.6112842023271
668	Sofia	MDG	41769	Madagascar	0.066	0.198	3	11.6112842023271
669	Vakinankaratra	MDG	41770	Madagascar	0.0226	0.198	3	11.6112842023271
670	Vatovavy Fitovinany	MDG	41771	Madagascar	0.1285	0.198	2	12.8216493249169
671	Kabarole	UGA	42180	Uganda	0.2221	0.380436	3	8.57499179073223
672	Kaberamaido	UGA	42181	Uganda	0.484	0.470204	1	NA
673	Kampala	UGA	42182	Uganda	0.088	0.38602	4	3.8392810370132
674	Kamwenge	UGA	42183	Uganda	0.2697	0.380436	3	10.4252522657124
675	Kanungu	UGA	42184	Uganda	0.0705	0.260009	3	7.46879808971433
676	Kayunga	UGA	42185	Uganda	0.5279	0.418572	1	NA
677	Mayuge	UGA	42189	Uganda	0.6486	0.4572	1	NA
678	Nakasongola	UGA	42195	Uganda	0.4609	0.418572	1	NA
679	Rukungiri	UGA	42197	Uganda	0.0841	0.260009	3	7.46879808971433
680	Wakiso	UGA	42200	Uganda	0.1423	0.398838	4	5.30530976214437
681	Yumbe	UGA	42201	Uganda	0.502	0.425836	1	NA
682	Amolatar	UGA	47067	Uganda	0.5151	0.355542	1	NA
683	Amuria	UGA	47068	Uganda	0.4126	0.470204	2	16.7401724187276
684	Butaleja	UGA	47071	Uganda	0.6248	0.470204	1	NA
685	Ibanda	UGA	47072	Uganda	0.2223	0.260009	2	12.7563050833774
686	Isingiro	UGA	47073	Uganda	0.1588	0.260009	3	9.95184793612507
687	Kaabong	UGA	47074	Uganda	0.1216	0.355542	4	5.3811351049125
688	Kaliro	UGA	47075	Uganda	0.6678	0.4572	1	NA
689	Katakwi	UGA	47078	Uganda	0.3649	0.470204	2	13.3919922571247
690	Kiruhura	UGA	47079	Uganda	0.3062	0.260009	2	17.4522722244189
691	Koboko	UGA	47080	Uganda	0.5173	0.425836	1	NA
692	Luwero	UGA	47083	Uganda	0.365	0.418572	2	14.7601098010362
693	Mbale	UGA	47085	Uganda	0.406	0.470204	2	16.2115439424566
694	Mbarara	UGA	47086	Uganda	0.1235	0.260009	3	8.59700919931158
695	Mityana	UGA	47087	Uganda	0.367	0.418572	2	14.8532523529687
696	Mubende	UGA	47088	Uganda	0.5199	0.418572	1	NA
697	Nakaseke	UGA	47089	Uganda	0.4192	0.418572	2	18.6761427041421
698	Tororo	UGA	47090	Uganda	0.6211	0.470204	1	NA
699	Diourbel	SEN	47585	Senegal	0.047	0.245014	3	8.32918703079088
700	Fatick	SEN	47586	Senegal	0.0604	0.281193	3	6.44038484172948
701	Louga	SEN	47587	Senegal	0.0445	0.242698	3	8.48212922011969
702	Matam	SEN	47588	Senegal	0.083	0.339379	4	4.72796926431027
703	Saint louis	SEN	47589	Senegal	0.0454	0.243881	3	8.42063456350207
704	Oromia	ETH	47678	Ethiopia	0.003	0.0867867	1	NA
705	Somali	ETH	47679	Ethiopia	0.0062	0.0867867	1	NA
706	Administrative unit not available	KEN	61033	Kenya	0.0323	0.502464	4	2.55235315340483
707	Area under National Administration	MOZ	65246	Mozambique	0.3929	0.34911	2	19.148156841532
708	Area under National Administration	MWI	65268	Malawi	0.3215	0.34911	2	14.1551410630593
709	Abia	NGA	65698	Nigeria	0.3273	0.469398	3	11.218315525923
710	Bauchi	NGA	65699	Nigeria	0.3746	0.392277	2	16.1932693136353
711	Bayelsa	NGA	65700	Nigeria	0.2595	0.473017	3	8.09972511659005
712	Ebonyi	NGA	65701	Nigeria	0.3758	0.510231	2	13.2953549574673
713	Ekiti	NGA	65702	Nigeria	0.4167	0.370356	1	NA
714	Enugu	NGA	65703	Nigeria	0.2129	0.41957	3	7.38020053095955
715	Gombe	NGA	65704	Nigeria	0.3157	0.404736	2	12.0739773249045
716	Nassarawa	NGA	65705	Nigeria	0.3317	0.488339	3	11.1269144480179
717	Ondo	NGA	65706	Nigeria	0.446	0.399186	1	NA
718	Plateau	NGA	65707	Nigeria	0.2197	0.419854	3	7.6355857941533
719	Rivers	NGA	65708	Nigeria	0.1835	0.461039	4	5.71920556322036
720	Sokoto	NGA	65709	Nigeria	0.3588	0.429165	2	14.0331149219123
721	Zamfara	NGA	65710	Nigeria	0.4642	0.403123	1	NA
722	Bangui	CAF	67154	Central African Republic	0.6409	0.472512	1	NA
723	Ascension	SHN	68772	NA	NA	NA	NA	NA
724	Saint Helena	SHN	68773	NA	NA	NA	NA	NA
725	Tristan Da Cunha	SHN	68774	NA	NA	NA	NA	NA
726	Kassala	SDN	68783	Sudan	0.0179	0.368735	4	4.17167593882654
727	Northern Kordofan	SDN	68784	Sudan	0.0253	0.390642	4	3.74546240108232
728	Gadaref	SDN	68805	Sudan	0.0198	0.368735	4	4.17167593882654
729	Matabeleland North	ZWE	69549	Zimbabwe	0.076	0.200711	3	11.4168498580244
730	Mashonaland East	ZWE	69550	Zimbabwe	0.0217	0.0926808	1	NA
731	Aride	SYC	61141	NA	NA	NA	NA	NA
732	St. Pierre	SYC	61203	NA	NA	NA	NA	NA
733	Aldabra	SYC	61135	NA	NA	NA	NA	NA
734	Mbeya	TZA	48367	United Republic of Tanzania	0.045	0.22863	3	9.38622170495791
735	Ilot Platte	SYC	61176	NA	NA	NA	NA	NA
736	Morogoro	TZA	48368	United Republic of Tanzania	0.1124	0.303277	3	6.33369573952172
737	St. Francois	SYC	61201	NA	NA	NA	NA	NA
738	Assumption	SYC	61142	NA	NA	NA	NA	NA
739	Therese	SYC	61206	NA	NA	NA	NA	NA
740	Denis	SYC	61161	NA	NA	NA	NA	NA
741	La Digue	SYC	61178	NA	NA	NA	NA	NA
742	Cousin	SYC	61157	NA	NA	NA	NA	NA
743	English River	SYC	61164	NA	NA	NA	NA	NA
744	Ile la Fouche	SYC	61175	NA	NA	NA	NA	NA
745	Darros	SYC	61160	NA	NA	NA	NA	NA
746	Kigoma	TZA	48362	United Republic of Tanzania	0.1681	0.351961	3	7.11848071882589
747	Coetivy	SYC	61207	NA	NA	NA	NA	NA
748	Singida	TZA	48377	United Republic of Tanzania	0.0604	0.258462	3	7.55029584165191
749	Lindi	TZA	48364	United Republic of Tanzania	0.2302	0.371107	3	9.1279690726111
750	Tanga	TZA	48381	United Republic of Tanzania	0.0728	0.21795	3	10.1146681548355
751	Desroches	SYC	61163	NA	NA	NA	NA	NA
752	Marie-Louise	SYC	61182	NA	NA	NA	NA	NA
753	Petite Soeur	SYC	61187	NA	NA	NA	NA	NA
754	Long Island	SYC	61180	NA	NA	NA	NA	NA
755	Providence	SYC	61194	NA	NA	NA	NA	NA
756	Mwanza	TZA	48370	United Republic of Tanzania	0.1855	0.426143	3	6.31663381860442
757	Administrative unit not available	SYC	61133	NA	NA	NA	NA	NA
758	African Banks	SYC	61134	NA	NA	NA	NA	NA
759	Bijoutier	SYC	61149	NA	NA	NA	NA	NA
760	Boudeuse	SYC	61151	NA	NA	NA	NA	NA
761	Glacis	SYC	61168	NA	NA	NA	NA	NA
762	Praslin	SYC	61193	NA	NA	NA	NA	NA
763	St Louis	SYC	61200	NA	NA	NA	NA	NA
764	Alphonse	SYC	61136	NA	NA	NA	NA	NA
765	Plaisance	SYC	61188	NA	NA	NA	NA	NA
766	Cascade	SYC	61153	NA	NA	NA	NA	NA
767	Administrative unit not available	SYC	61208	NA	NA	NA	NA	NA
768	Pemba South	TZA	48378	United Republic of Tanzania	0.0301	NA	NA	NA
769	Rukwa	TZA	48374	United Republic of Tanzania	0.0667	0.409584	4	3.42748558075637
770	Bel Air	SYC	61147	NA	NA	NA	NA	NA
771	Dar es Salaam	TZA	48358	United Republic of Tanzania	0.0575	NA	NA	NA
772	Ruvuma	TZA	48375	United Republic of Tanzania	0.1229	0.30153	3	6.74929434288855
773	Silhouette	SYC	61199	NA	NA	NA	NA	NA
774	Grand Anse Mahe	SYC	61169	NA	NA	NA	NA	NA
775	Ile du Sud	SYC	61174	NA	NA	NA	NA	NA
776	Platte	SYC	61189	NA	NA	NA	NA	NA
777	Grande Soeur	SYC	61170	NA	NA	NA	NA	NA
778	North Island	SYC	61186	NA	NA	NA	NA	NA
779	Kagera	TZA	48361	United Republic of Tanzania	0.1833	0.29348	3	9.34562296811487
780	Unguja North	TZA	48372	United Republic of Tanzania	0.0462	NA	NA	NA
781	Seche	SYC	61198	NA	NA	NA	NA	NA
782	Islette	SYC	61177	NA	NA	NA	NA	NA
783	Au Cap	SYC	61144	NA	NA	NA	NA	NA
784	Bird	SYC	61150	NA	NA	NA	NA	NA
785	Roche Caiman	SYC	61196	NA	NA	NA	NA	NA
786	Mara	TZA	48366	United Republic of Tanzania	0.121	0.373708	4	5.04138669088673
787	Unguja South	TZA	48379	United Republic of Tanzania	0.0498	0.474239	4	2.72435793972495
788	Moyenne	SYC	61185	NA	NA	NA	NA	NA
789	Takamaka	SYC	61205	NA	NA	NA	NA	NA
790	Les Mamelles	SYC	61179	NA	NA	NA	NA	NA
791	Beau Vallon	SYC	61146	NA	NA	NA	NA	NA
792	Belombre	SYC	61148	NA	NA	NA	NA	NA
793	Mtwara	TZA	48369	United Republic of Tanzania	0.2006	0.399589	3	7.32958126161722
794	Felicite	SYC	61166	NA	NA	NA	NA	NA
795	Mont Buxton	SYC	61183	NA	NA	NA	NA	NA
796	Mont Fleuri	SYC	61184	NA	NA	NA	NA	NA
797	Farquhar	SYC	61165	NA	NA	NA	NA	NA
798	Anse Boileau	SYC	61138	NA	NA	NA	NA	NA
799	Ile Aux Rat	SYC	61171	NA	NA	NA	NA	NA
800	Manyara	TZA	48365	United Republic of Tanzania	0.0413	0.172233	2	13.7569899773122
801	Curieuse	SYC	61159	NA	NA	NA	NA	NA
802	Desnoeufs	SYC	61162	NA	NA	NA	NA	NA
803	Arusha	TZA	48357	United Republic of Tanzania	0.0358	0.1571	2	15.1573607380498
804	St. Joseph Atoll	SYC	61202	NA	NA	NA	NA	NA
805	Ile Cocos	SYC	61173	NA	NA	NA	NA	NA
806	Fregate	SYC	61167	NA	NA	NA	NA	NA
807	Shinyanga	TZA	48376	United Republic of Tanzania	0.1491	0.385299	4	5.77326866407183
808	Pemba North	TZA	48371	United Republic of Tanzania	0.0336	NA	NA	NA
809	Kilimanjaro	TZA	48363	United Republic of Tanzania	0.0285	0.201913	3	11.3011616301247
810	Conception	SYC	61155	NA	NA	NA	NA	NA
811	Remire	SYC	61195	NA	NA	NA	NA	NA
812	Ste Anne	SYC	61204	NA	NA	NA	NA	NA
813	Unguja Urban West	TZA	48382	United Republic of Tanzania	0.0391	NA	NA	NA
814	Anse Aux Pins	SYC	61137	NA	NA	NA	NA	NA
815	Tabora	TZA	48380	United Republic of Tanzania	0.0993	0.431609	4	3.38568311088175
816	Anse Royale	SYC	61140	NA	NA	NA	NA	NA
817	Poivre	SYC	61191	NA	NA	NA	NA	NA
818	Cerf Island	SYC	61154	NA	NA	NA	NA	NA
819	Port Glaud	SYC	61192	NA	NA	NA	NA	NA
820	Pointe Larue	SYC	61190	NA	NA	NA	NA	NA
821	Pwani	TZA	48373	United Republic of Tanzania	0.1706	0.386067	3	6.51149274052706
822	Iringa	TZA	48360	United Republic of Tanzania	0.0582	0.115732	2	19.6770004144553
823	Dodoma	TZA	48359	United Republic of Tanzania	0.0616	0.227236	3	9.48772162501269
824	Cachee	SYC	61152	NA	NA	NA	NA	NA
825	Ile Aux Vaches	SYC	61172	NA	NA	NA	NA	NA
826	Cosmoledo	SYC	61156	NA	NA	NA	NA	NA
827	Round Island	SYC	61197	NA	NA	NA	NA	NA
828	Anse Etoile	SYC	61139	NA	NA	NA	NA	NA
829	Marianne	SYC	61181	NA	NA	NA	NA	NA
830	Astove	SYC	61143	NA	NA	NA	NA	NA
831	Cousine	SYC	61158	NA	NA	NA	NA	NA
832	Baie Lazare	SYC	61145	NA	NA	NA	NA	NA
833	Central	KEN	51325	Kenya	0.0047	0.0980946	1	NA
834	Rift Valley	KEN	51331	Kenya	0.0159	0.189694	2	12.287067950637
835	Nairobi	KEN	51328	Kenya	2e-04	0.22442	3	9.65881211290165
836	Northern Province	ZAF	1013704	South Africa	0.0233	0.398838	4	3.60433016861489
837	Eastern Cape	ZAF	1013702	South Africa	0	NA	NA	NA
838	Northern Cape	ZAF	1013701	South Africa	0	NA	NA	NA
839	Western Cape	ZAF	1013707	South Africa	0	NA	NA	NA
840	Kwazulu-natal	ZAF	1013703	South Africa	0.0026	0.260009	3	7.46879808971433
841	Free State	ZAF	1013706	South Africa	0	NA	NA	NA
842	Mpumalanga	ZAF	1013699	South Africa	0.0151	0.470204	4	2.75423407547294
843	Gauteng	ZAF	1013705	South Africa	1e-04	0.198	3	11.6112842023271
844	North-west	ZAF	1013700	South Africa	3e-04	0.470204	4	2.75423407547294
845	Western	KEN	51332	Kenya	0.2492	0.350441	3	10.4083673116801
846	Nyanza	KEN	51330	Kenya	0.1566	0.366264	3	6.41553236453276
847	Eastern	KEN	51327	Kenya	0.0098	0.315064	4	5.27659638427274
848	Coast	KEN	51326	Kenya	0.0413	0.321182	4	5.12425355282837
849	North Eastern	KEN	51329	Kenya	0.0179	0.373905	4	4.07631232445348
