# Supplementary figures and images for: Modelling the drivers of the spread of Plasmodium falciparum hrp2 gene deletions in sub-Saharan Africa
Source: eLife journal article supplement (doi:10.7554/elife.25008), 2017-08-24

a

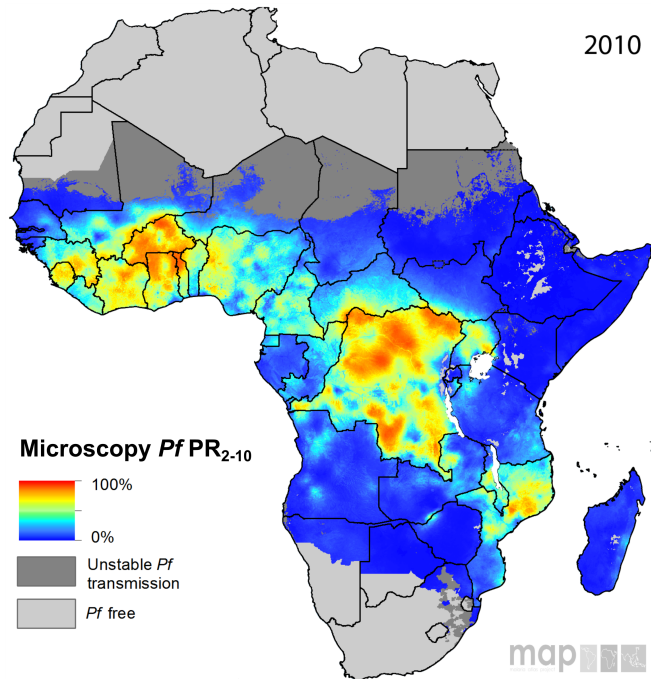

b

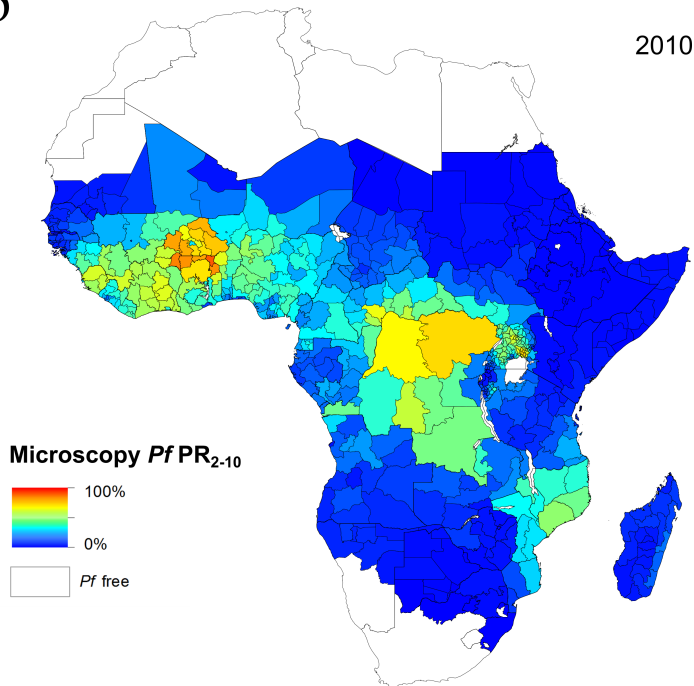

Supplement: supp [file elife-25008-supp-v1.zip]

Proportion of strains that are *pflhrp2*-deleted

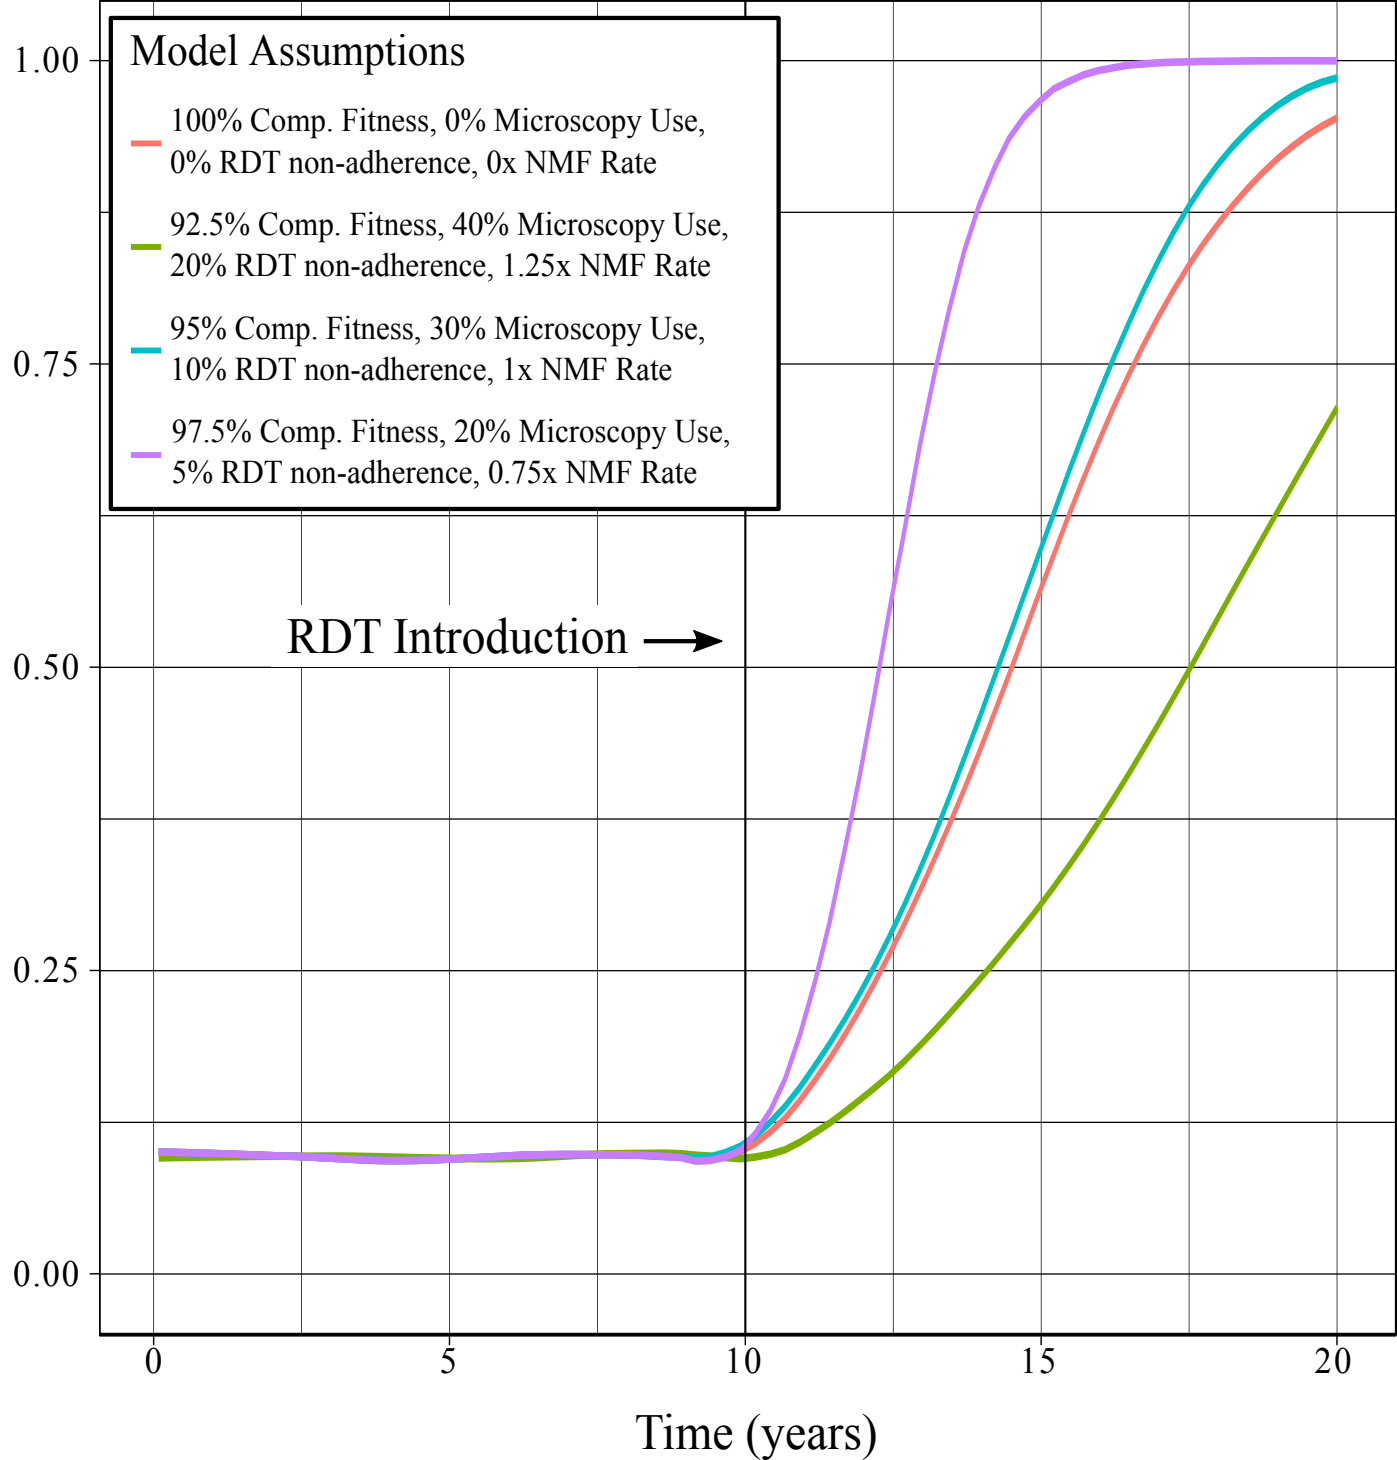

Supplement: supp [file elife-25008-supp-v1.zip]

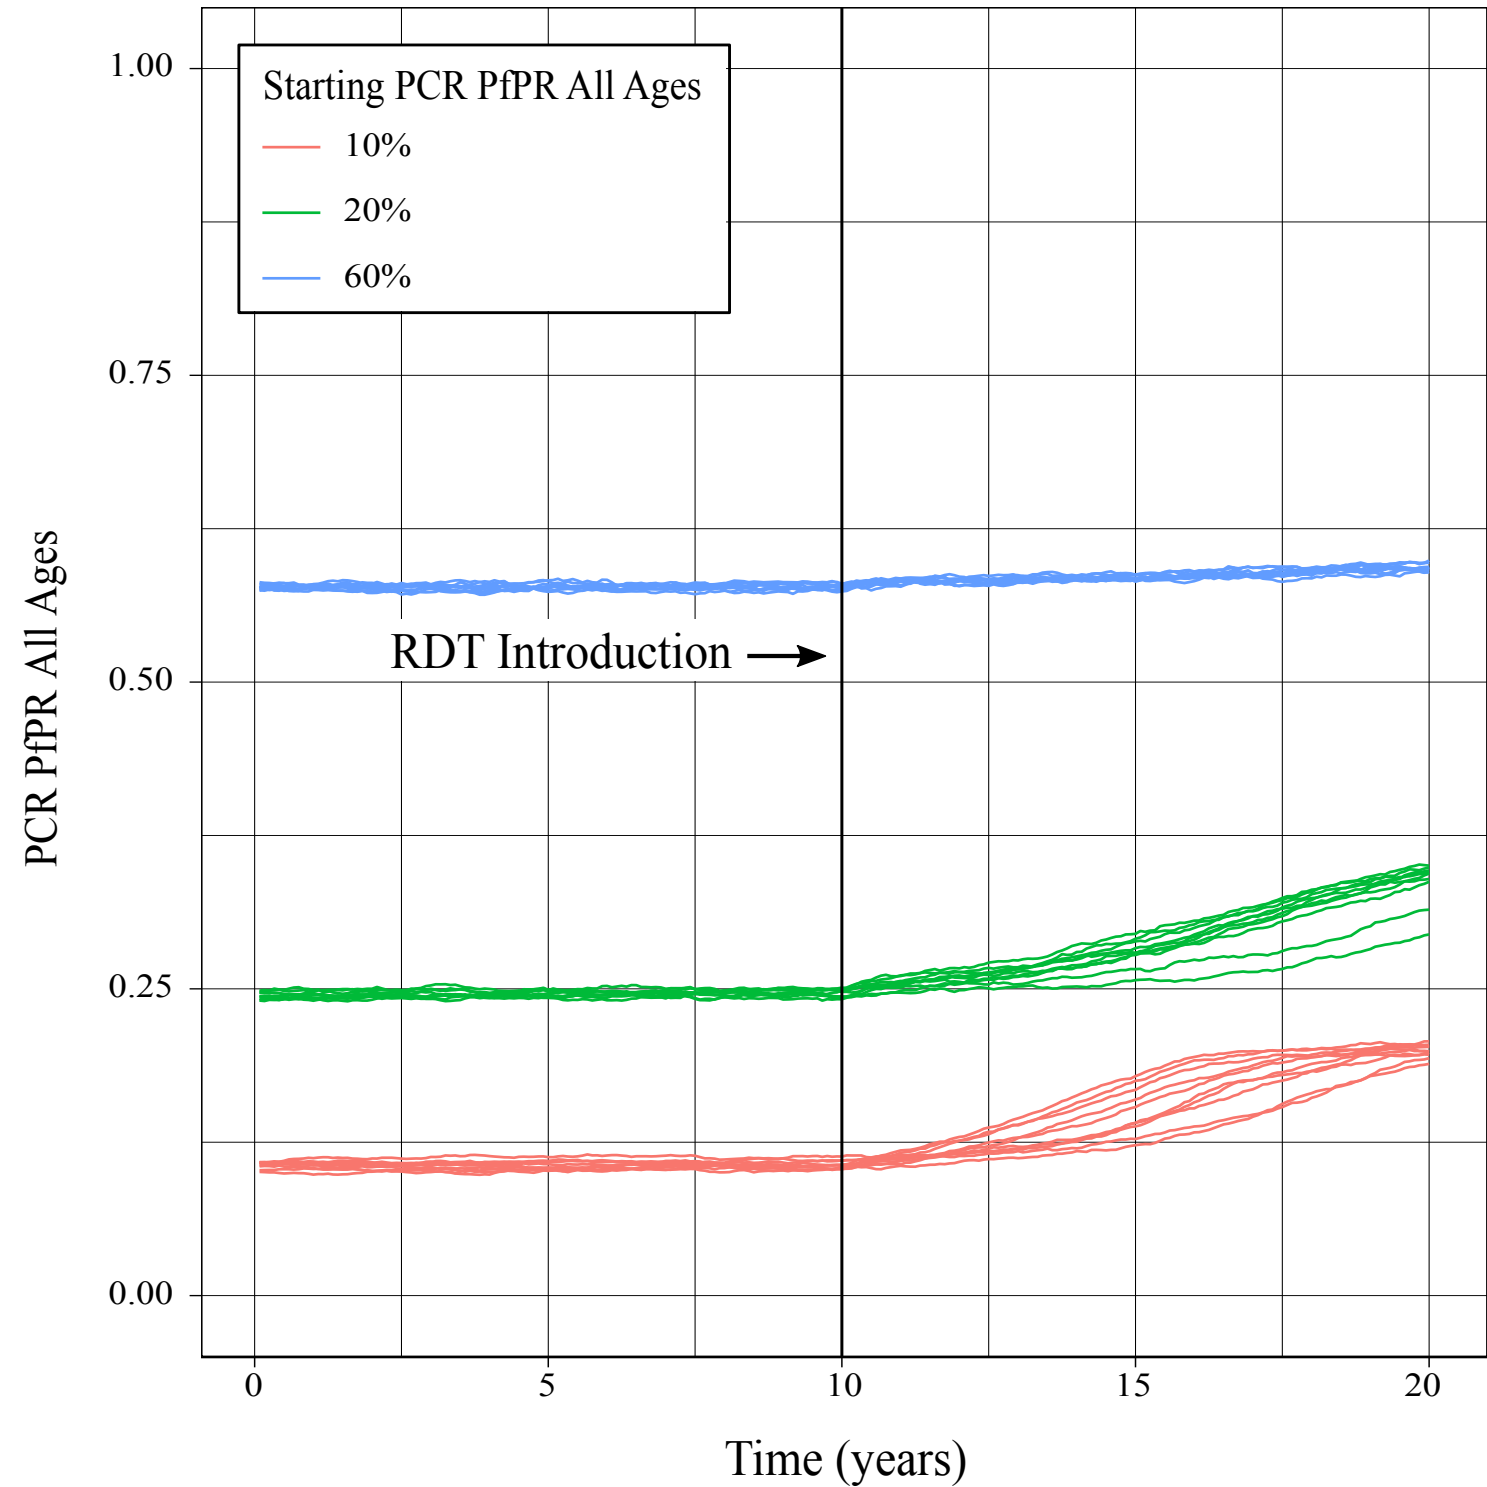

Supplement: supp [file elife-25008-supp-v1.zip]

a

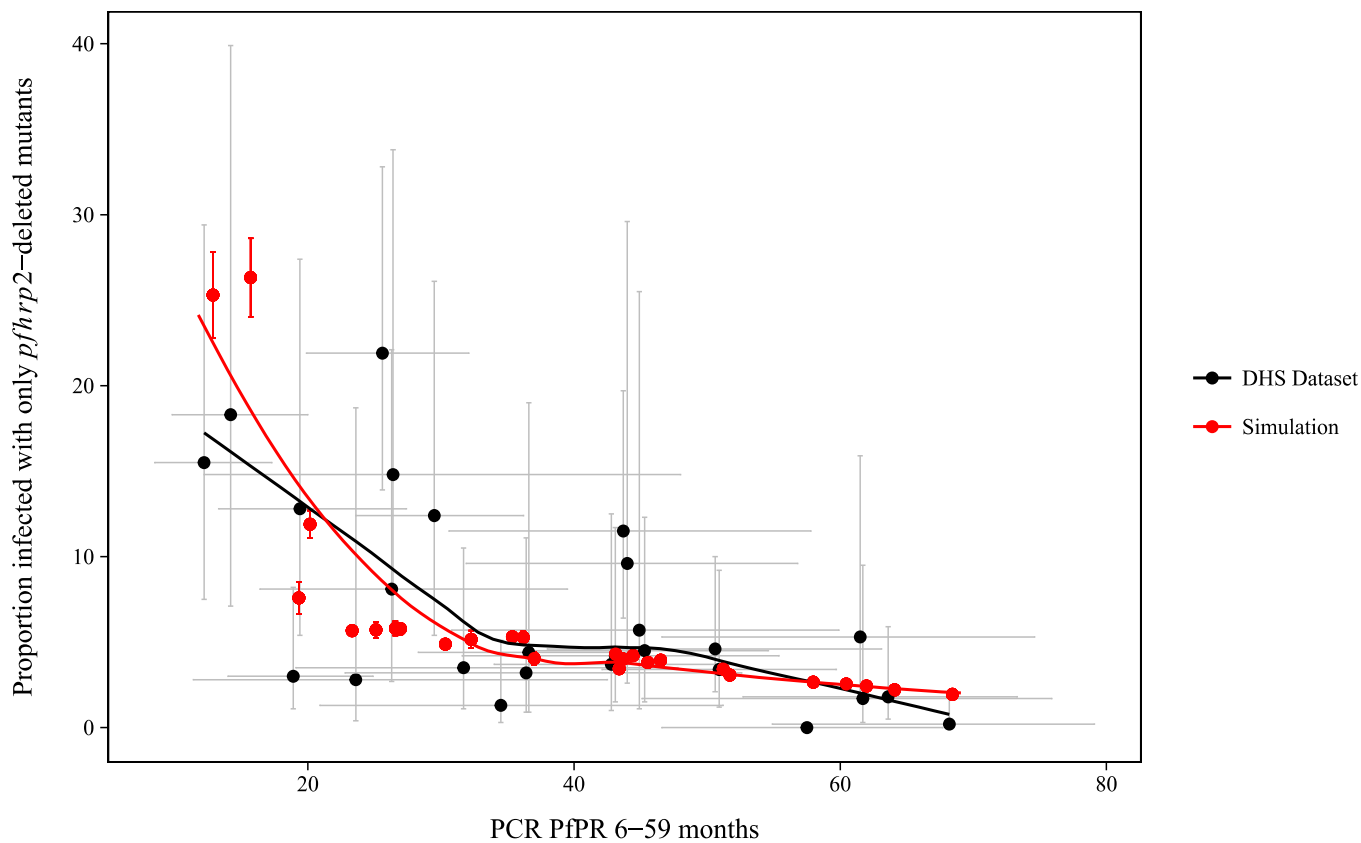

b

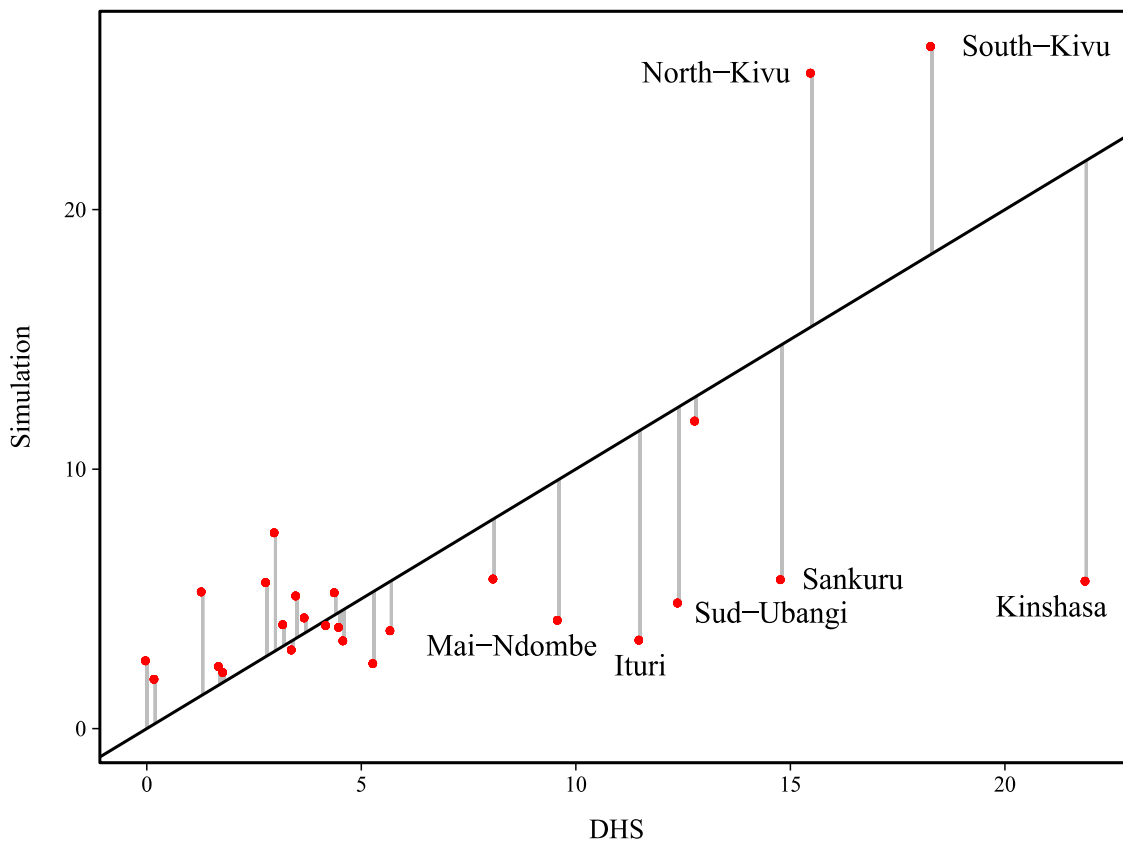

Supplement: supp [file elife-25008-supp-v1.zip]

# Year RDT Use Reported at Community Level

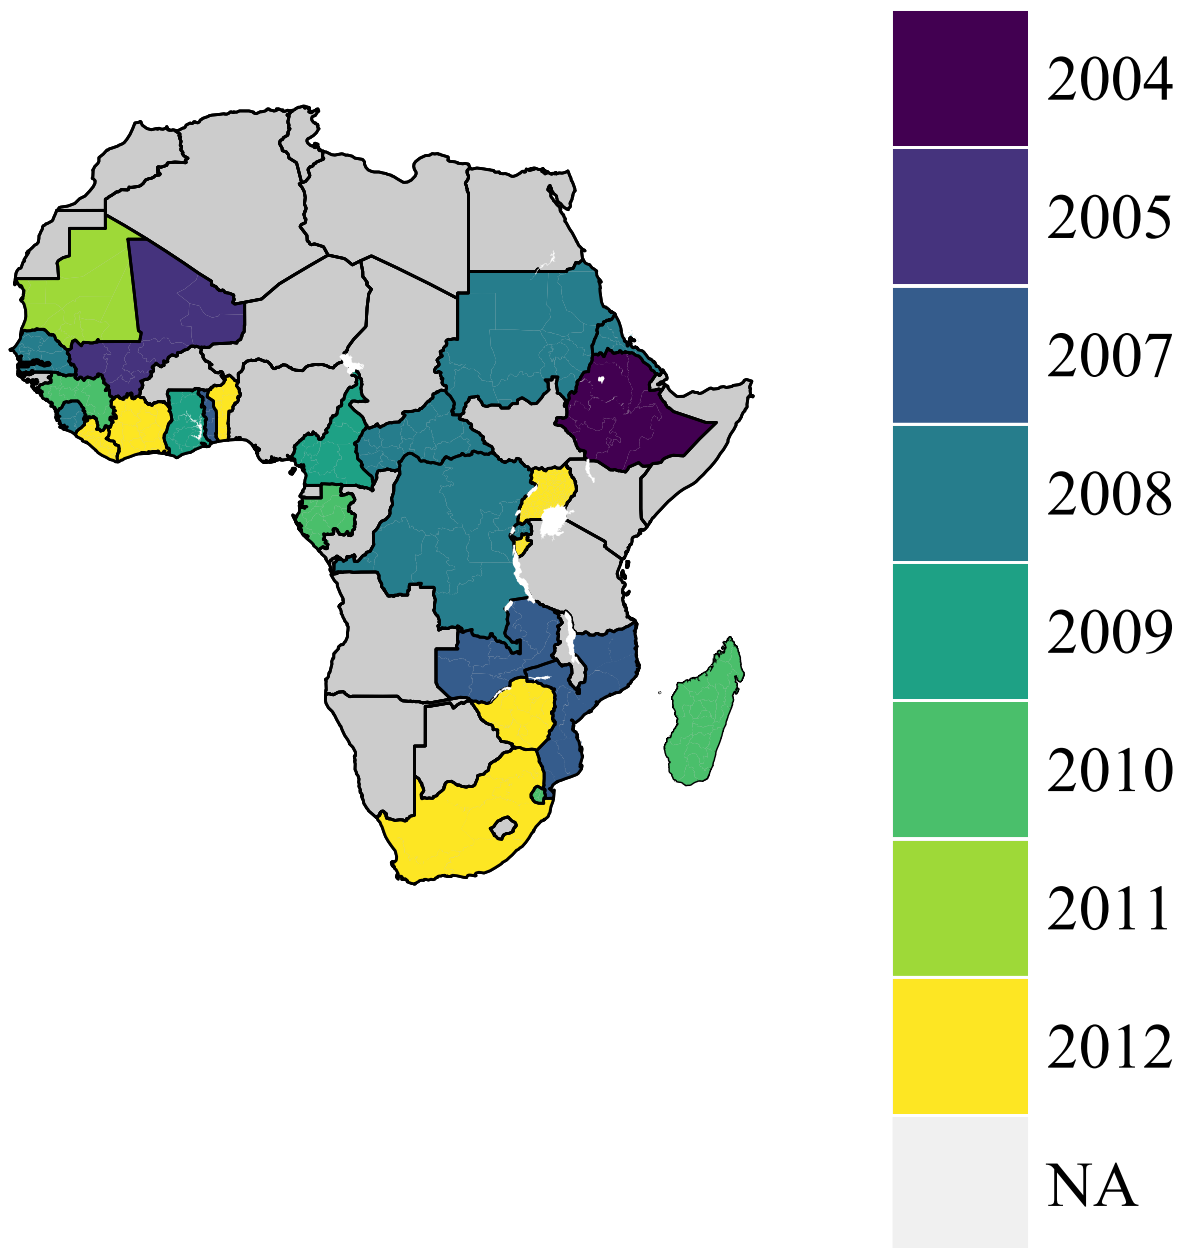

Supplement: supp [file elife-25008-supp-v1.zip]

Proportion of strains that are *pfhrp2*-deleted

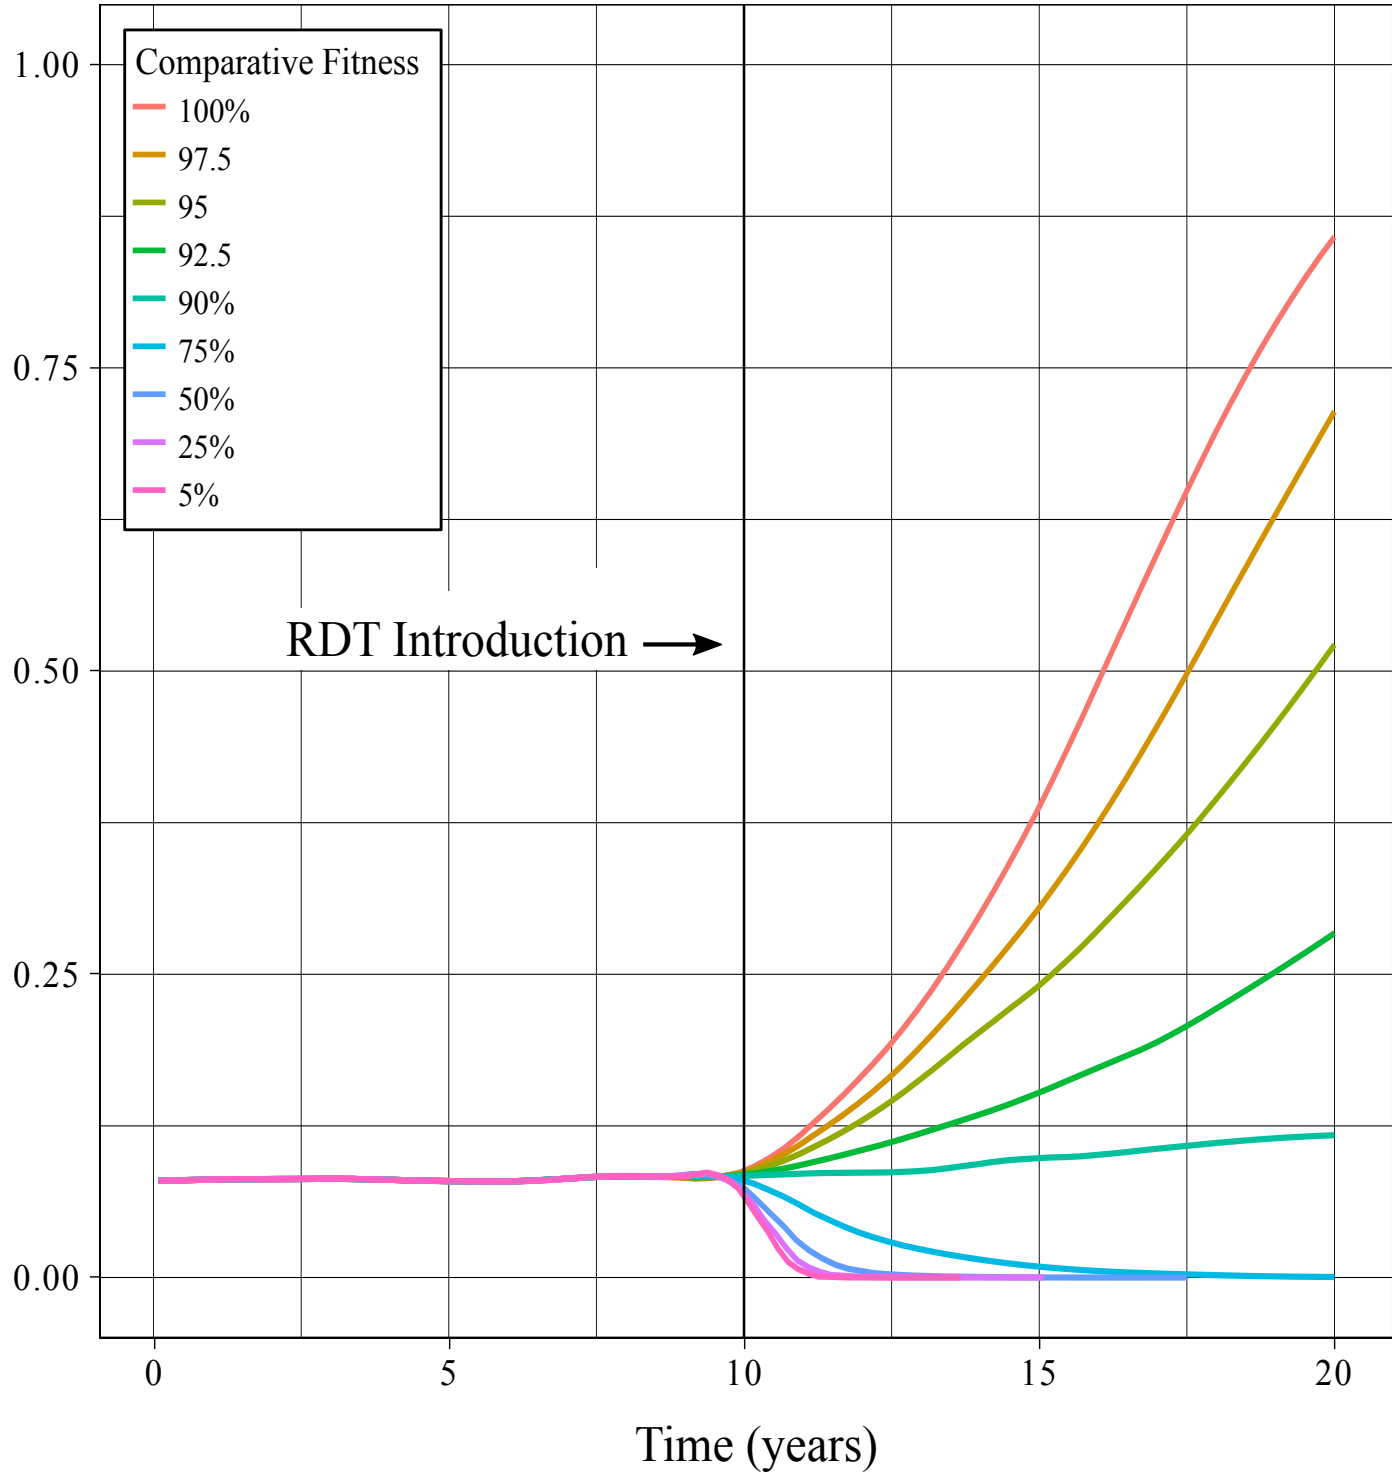

Supplement: supp [file elife-25008-supp-v1.zip]

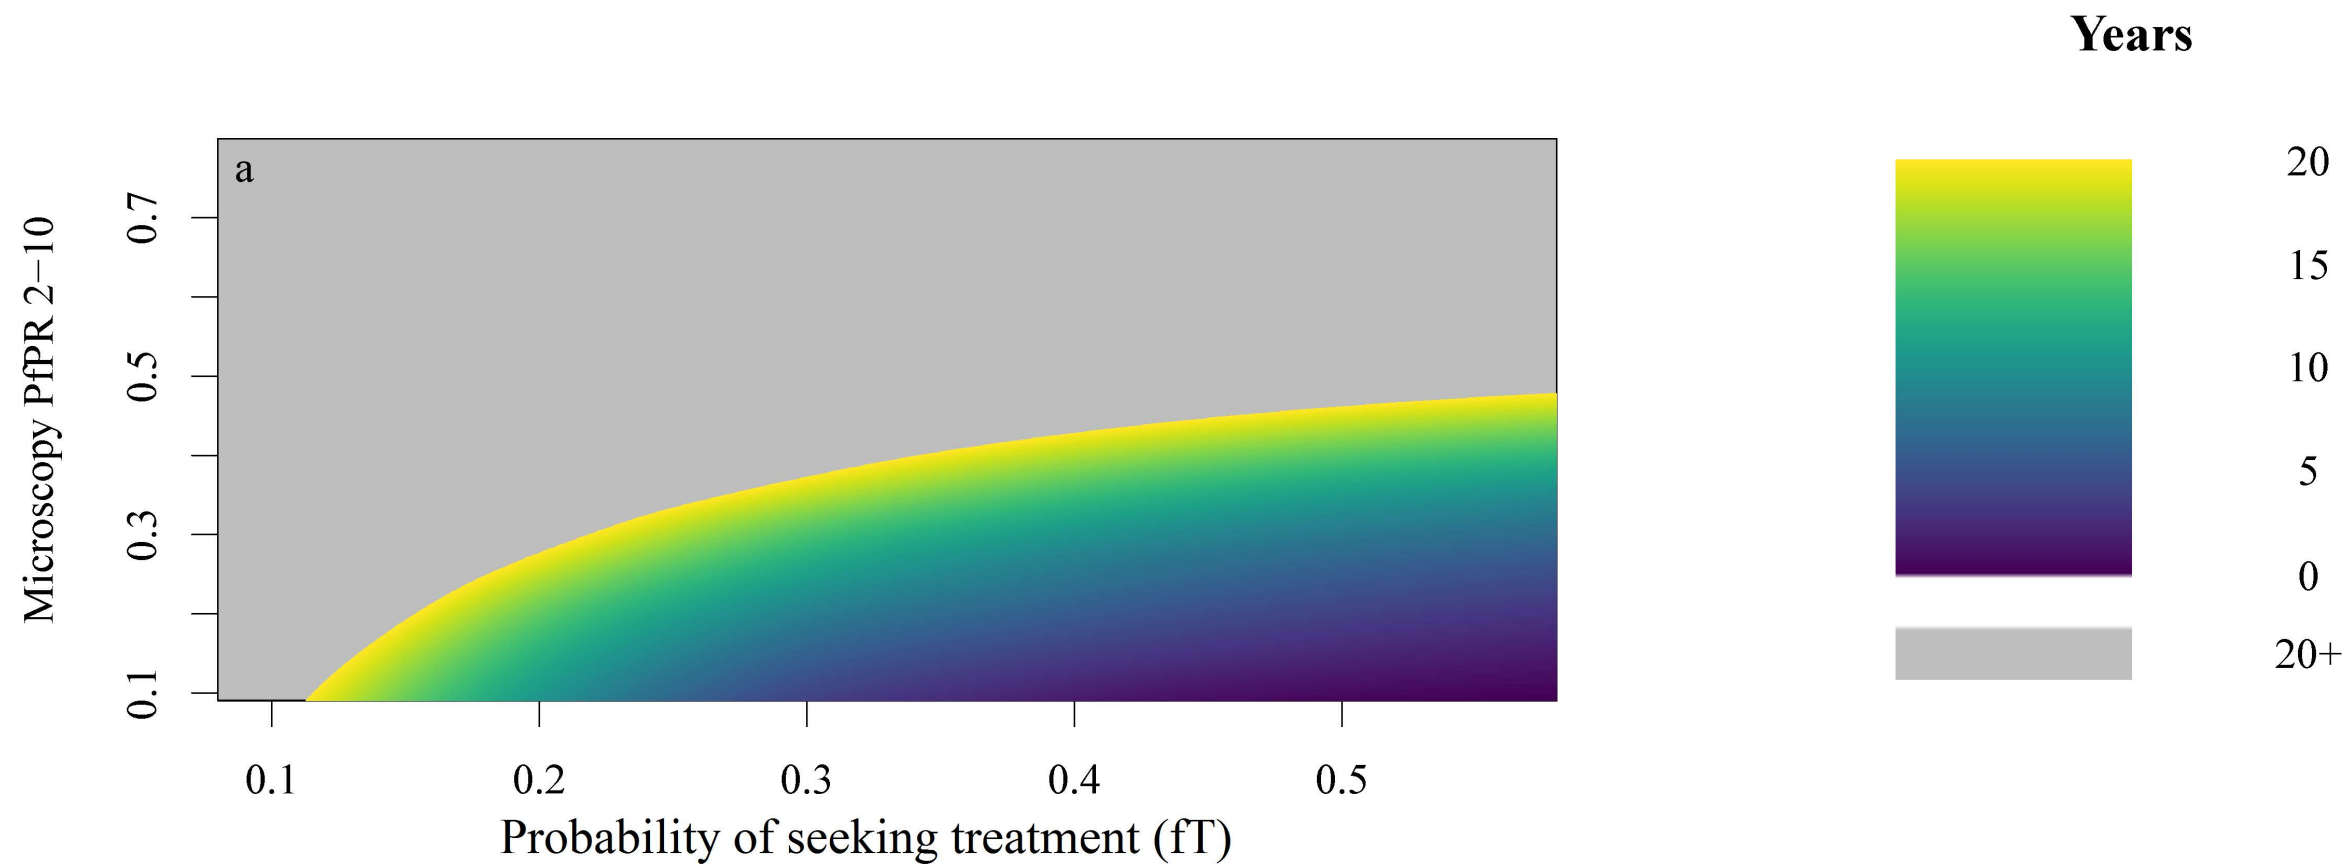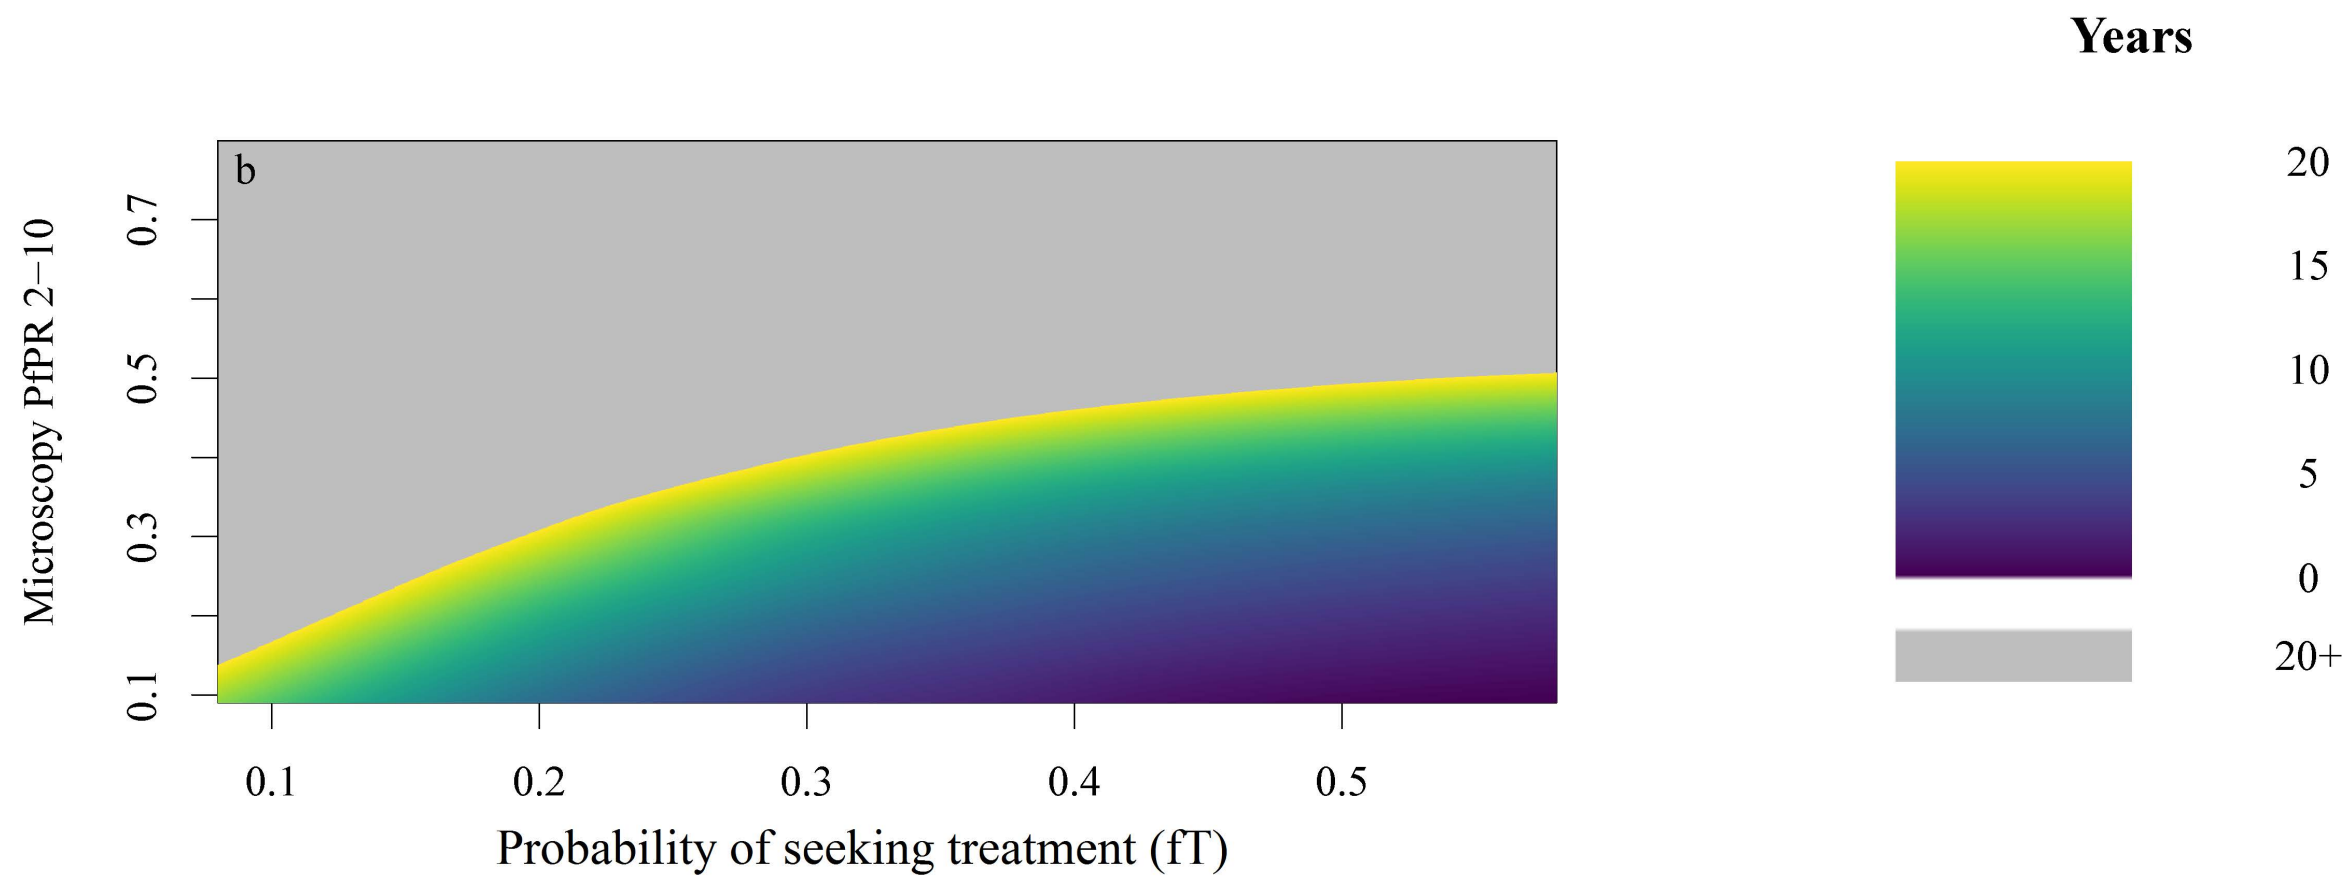

Supplement: supp [file elife-25008-supp-v1.zip]

Proportion of strains that are *pfhrp2*-deleted

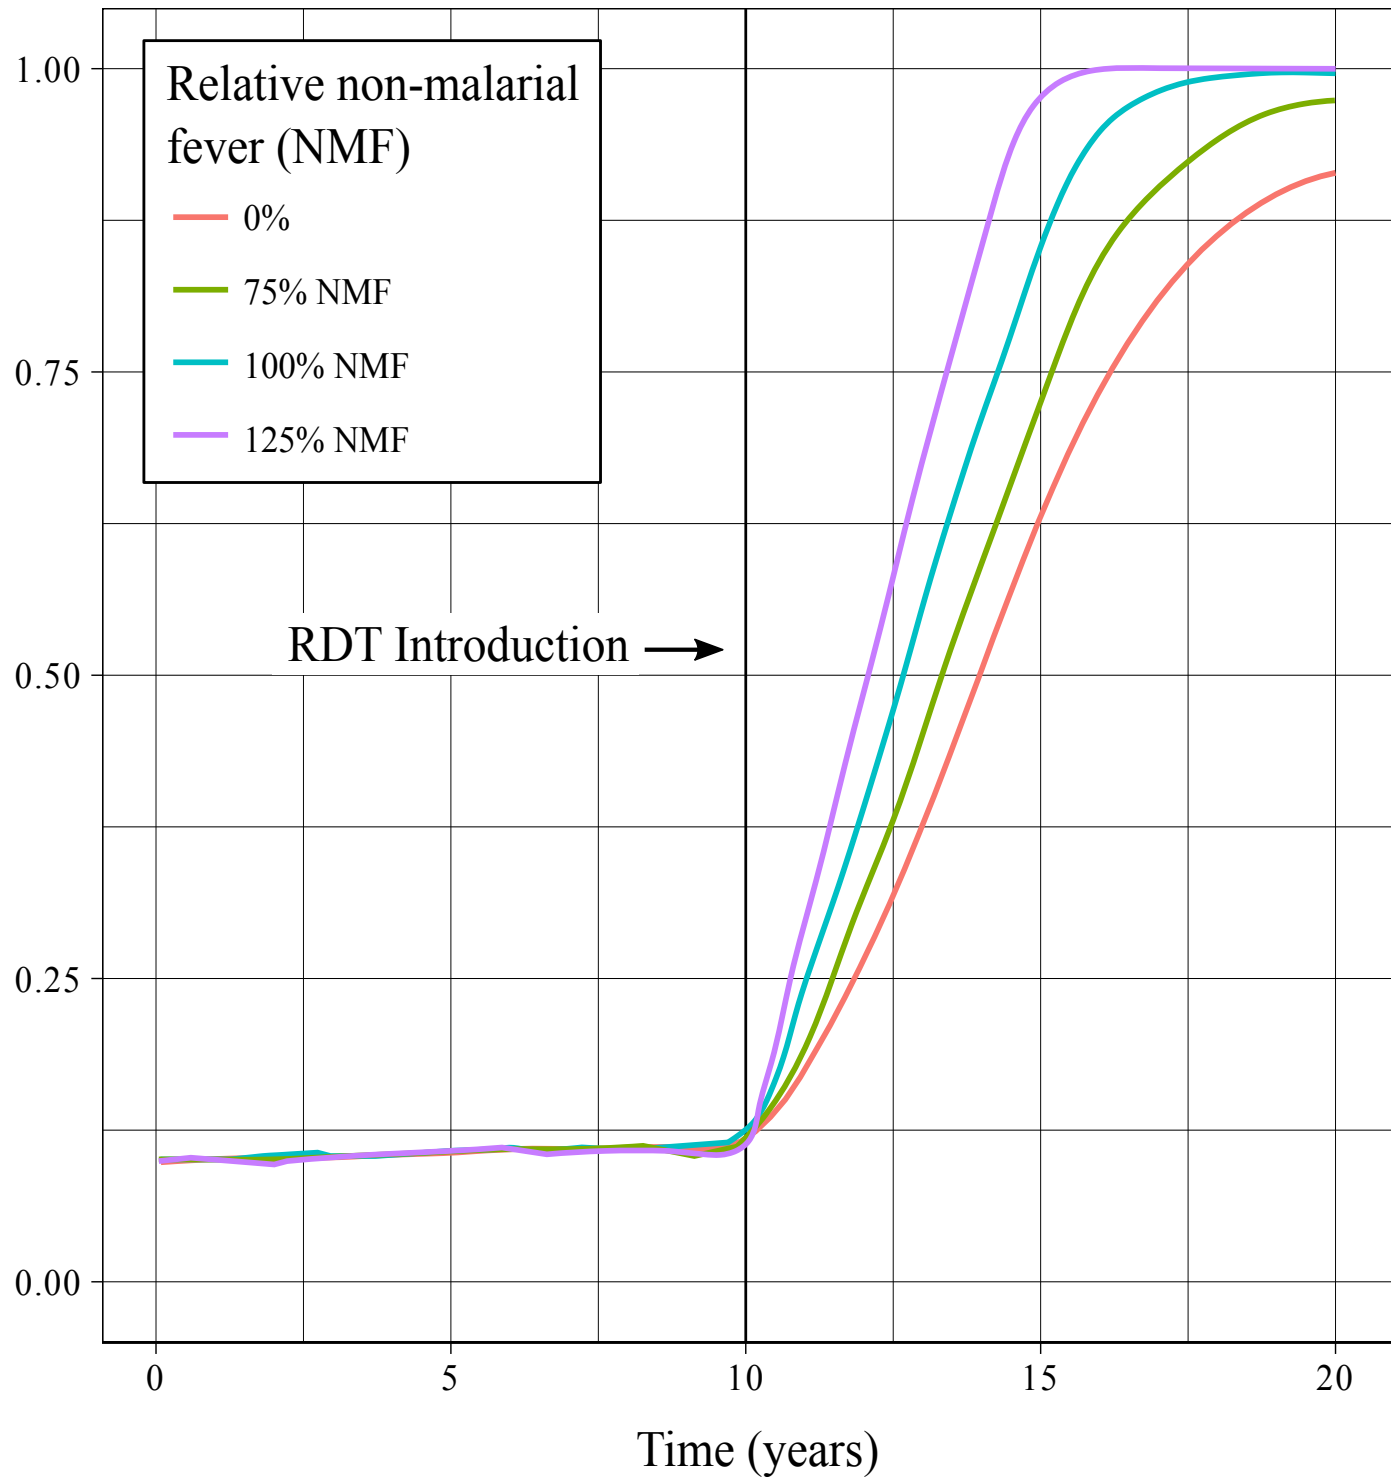

Supplement: supp [file elife-25008-supp-v1.zip]

Proportion of strains that are *pfhrp2*-deleted

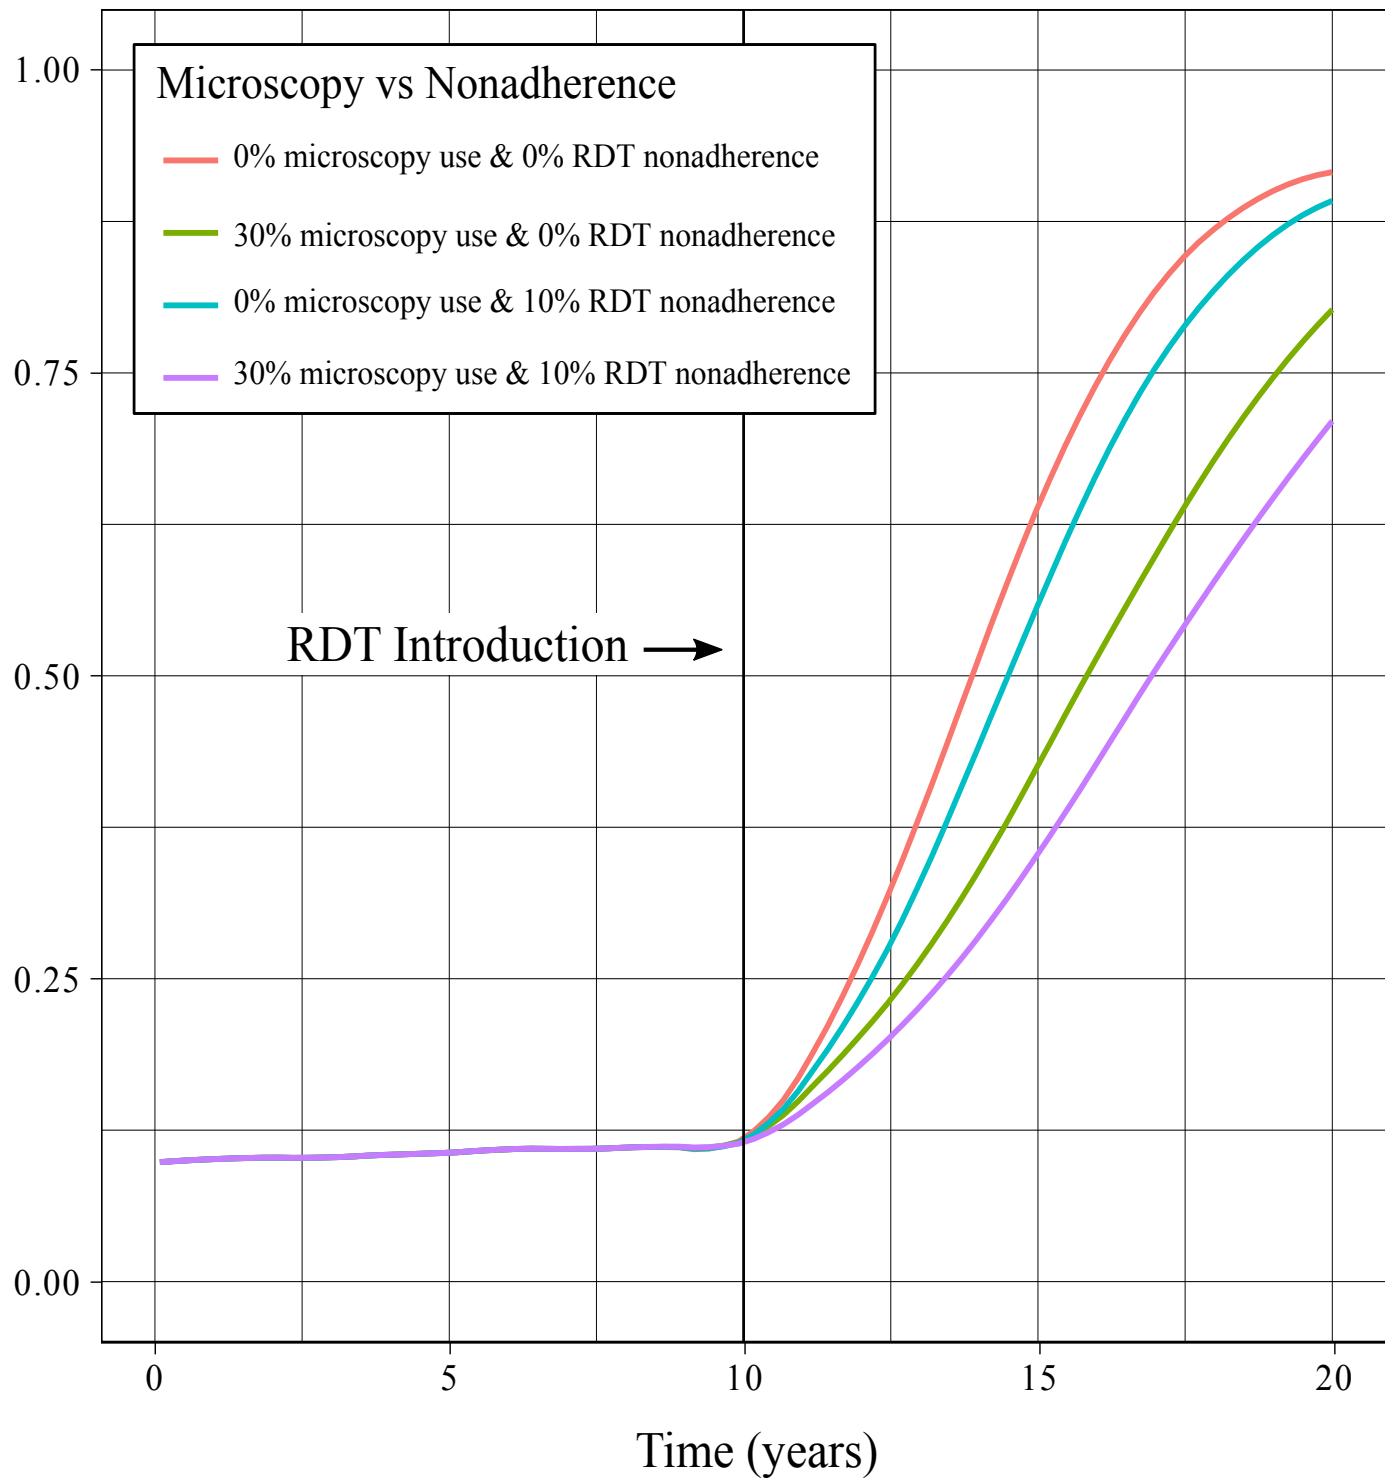

Supplement: supp [file elife-25008-supp-v1.zip]

a

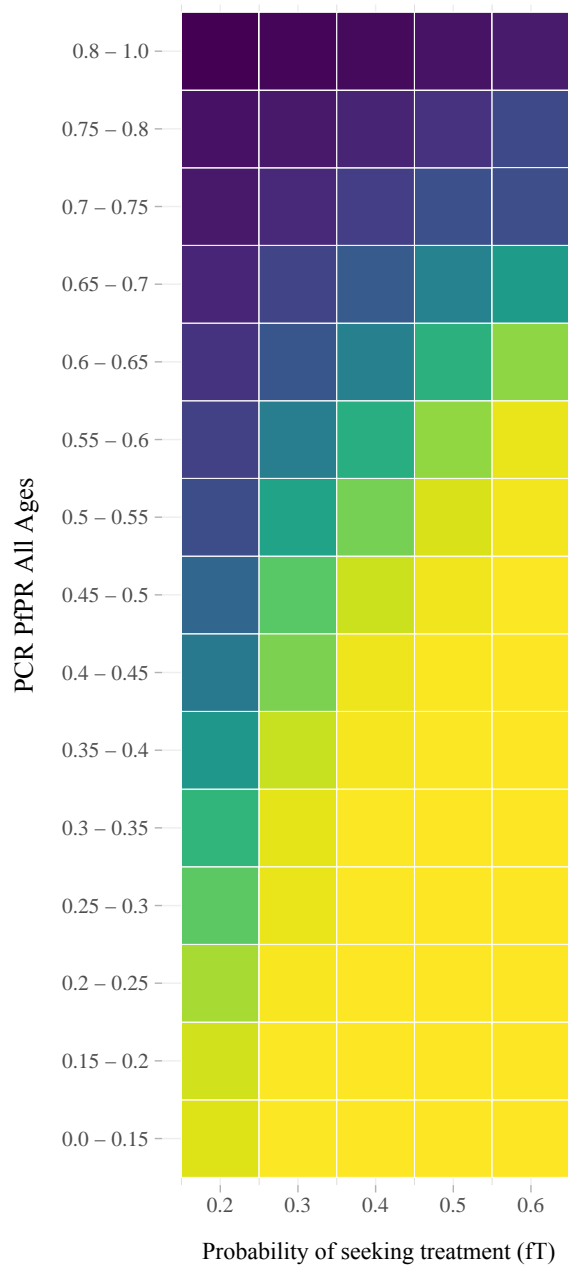

b

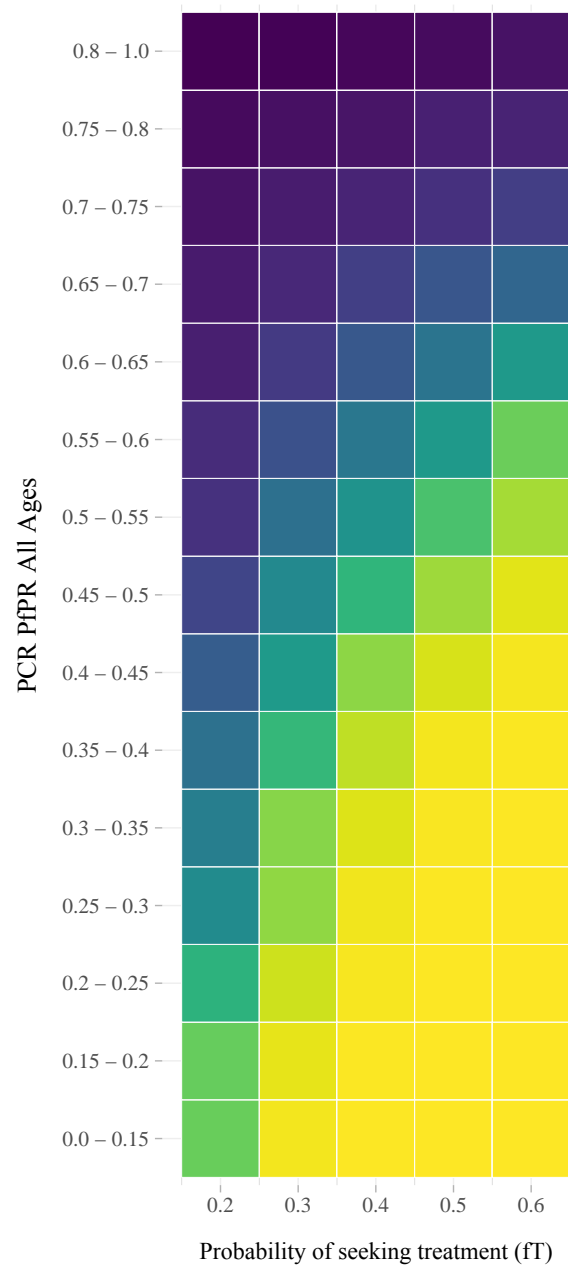

Frequency of  
*pshrp2*-deletion  
after 20 years

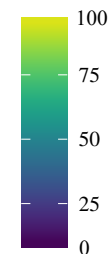

Supplement: supp [file elife-25008-supp-v1.zip]
